# Supplementary material for: Rh(iii)-catalyzed chemoselective C–H functionalizations of tertiary aniline N-oxides with alkynes
Source: Royal Society of Chemistry journal article supplement (doi:10.1039/c6cc02217k), 2016-01-01

*Supporting Information*

**Rh(III)-catalyzed chemoselective C–H functionalizations of  
tertiary aniline *N*-oxides with alkynes**

Xiaolei Huang, Wenbo Liang, Yang Shi and Jingsong You\*

*Key Laboratory of Green Chemistry and Technology of Ministry of Education,  
College of Chemistry, and State Key Laboratory of Biotherapy, West China Medical  
School, Sichuan University, 29 Wangjiang Road, Chengdu 610064, PR China*

*Fax: 86-28-85412203; E-mail: jsyou@scu.edu.cn*

## Table of Contents

|                                                                                                                                                                                       |     |
|---------------------------------------------------------------------------------------------------------------------------------------------------------------------------------------|-----|
| I. General remarks.....                                                                                                                                                               | S3  |
| II. Optimization of the Rh-catalyzed annulation of <i>N,N</i> -dimethylaniline <i>N</i> -oxide <b>1a</b> with diphenylacetylene <b>2a</b> .....                                       | S3  |
| III. General procedure for the Rh-catalyzed functionalization of tertiary aniline <i>N</i> -oxides <b>1</b> with alkynes <b>2</b> .....                                               | S4  |
| IV. Experimental data for the described substances.....                                                                                                                               | S5  |
| V. Rh(III)-catalyzed annulation of <i>N</i> -ethyl- <i>N</i> -methylaniline <i>N</i> -oxide and <i>N</i> -benzyl- <i>N</i> -methylaniline <i>N</i> -oxide with diphenylacetylene..... | S22 |
| VI. Mechanistic study.....                                                                                                                                                            | S24 |
| VII. References.....                                                                                                                                                                  | S28 |
| VIII. Copies of <sup>1</sup> H and <sup>13</sup> C NMR spectra.....                                                                                                                   | S29 |

## I. General remarks

NMR spectra were obtained on an Agilent 400-MR DD2 spectrometer. The  $^1\text{H}$  NMR (400 MHz) chemical shifts were measured relative to  $\text{CDCl}_3$  as the internal reference ( $\text{CDCl}_3$ :  $\delta = 7.26$ ). The  $^{13}\text{C}$  NMR (100 MHz) chemical shifts were given using  $\text{CDCl}_3$  as the internal standard ( $\text{CDCl}_3$ :  $\delta = 77.16$ ). High-resolution mass spectra (HRMS) were obtained with a Shimadzu LCMS-IT-TOF (ESI). GC-MS spectra were recorded by Shimadzu GCMS-QP2010 SE. Melting points were determined with XRC-1 and are uncorrected. Analytical thin layer chromatography was performed on HG/T2354-92  $\text{GF}_{254}$  plates (Qingdao Haiyang Chemical Co., Ltd.).

Unless otherwise noted, all reagents were obtained from commercial suppliers and used without further purification.  $\text{RhCl}_3 \cdot 3\text{H}_2\text{O}$  were purchased from Shanxi Kaida Chemical Engineering (China) CO., Ltd. Various arylamines and diphenylacetylene were purchased from Adamas-beta Ltd.  $[\text{Cp}^*\text{RhCl}_2]_2$  ( $\text{Cp}^*$  = pentamethyl cyclopentadienyl),<sup>1</sup> tertiary anilines,<sup>2</sup> tertiary aniline *N*-oxides,<sup>3</sup> and *N,N*-dimethylaniline-2,3,4,5,6-*d*<sub>5</sub> *N*-oxide (**1a**-[D<sub>5</sub>])<sup>4</sup> were prepared according to the literature procedures. Dichloroethane (DCE) and *N,N*-dimethylformamide (DMF) were dried by refluxing over  $\text{CaH}_2$ . MeOH and 1,4-dioxane were dried by refluxing over Mg and Na, respectively, and freshly distilled prior to use.

## II. Optimization of the Rh-catalyzed annulation of *N,N*-dimethylaniline *N*-oxide **1a** with diphenylacetylene **2a**

A sealable tube with a magnetic stir bar was charged with  $[\text{RhCp}^*\text{Cl}_2]_2$  (7.8 mg, 12.5  $\mu\text{mol}$ , 5 mol%),  $\text{Ag}^+$  salt (20 mol%), additive (2.0 equiv), *N,N*-dimethylaniline *N*-oxide **1a** (68.6 mg, 0.50 mmol, 2.0 equiv), diphenylacetylene **2a** (44.6 mg, 0.25 mmol) and solvent (1.0 mL) under an  $\text{N}_2$  atmosphere. The reaction mixture was stirred at 60  $^\circ\text{C}$  for 24 h. After being cooled to ambient temperature, the resulting solution was diluted with 5 mL of dichloromethane, filtered through a celite pad and washed with 10-20 mL of dichloromethane. The combined organic phases were evaporated, and the resulting residue was purified by column chromatography on silica gel (petroleum ether/EtOAc = 100/1 to 50/1, v/v) to provide the desired product

**3a** and 2-(2-(dimethylamino)phenyl)-1,2-diphenylethanone **3a'** as by-product.

**Table S1** Optimization of reaction conditions.<sup>a</sup>

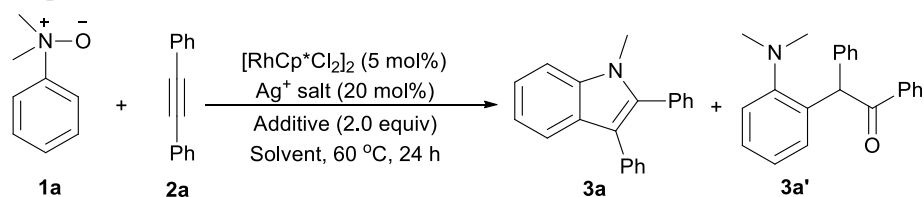

| Entry           | Ag <sup>+</sup> salt     | Additive             | Solvent        | Yield of <b>3a</b> (%) <sup>b</sup> | Yield of <b>3a'</b> (%) <sup>b</sup> |
|-----------------|--------------------------|----------------------|----------------|-------------------------------------|--------------------------------------|
| 1               | AgSbF <sub>6</sub>       | PivOH                | MeOH           | 60                                  | 25                                   |
| 2               | AgSbF <sub>6</sub>       | PivOH                | dioxane        | 0                                   | 0                                    |
| 3               | AgSbF <sub>6</sub>       | PivOH                | DMF            | 0                                   | 0                                    |
| 4               | AgSbF <sub>6</sub>       | PivOH                | DCE            | 18                                  | 35                                   |
| 5               | AgSbF <sub>6</sub>       | PivOH                | <i>t</i> -AmOH | 15                                  | 19                                   |
| 6               | AgSbF <sub>6</sub>       | HOAc                 | MeOH           | 40                                  | 28                                   |
| 7               | AgSbF <sub>6</sub>       | CF <sub>3</sub> COOH | MeOH           | 0                                   | 0                                    |
| 8               | AgSbF <sub>6</sub>       | AdCOOH               | MeOH           | 45                                  | 27                                   |
| <b>9</b>        | <b>AgSbF<sub>6</sub></b> | <b>CyCOOH</b>        | <b>MeOH</b>    | <b>70</b>                           | <b>trace</b>                         |
| 10              | AgSbF <sub>6</sub>       | Cu(OAc) <sub>2</sub> | MeOH           | trace                               | trace                                |
| 11              | AgSbF <sub>6</sub>       | CsOPiv               | MeOH           | 15                                  | 22                                   |
| 12              | AgPF <sub>6</sub>        | CyCOOH               | MeOH           | 45                                  | 18                                   |
| 13              | AgOPiv                   | CyCOOH               | MeOH           | 62                                  | 14                                   |
| 14              | AgOAc                    | CyCOOH               | MeOH           | 0                                   | trace                                |
| 15              | -                        | CyCOOH               | MeOH           | 44                                  | 27                                   |
| 16 <sup>c</sup> | AgSbF <sub>6</sub>       | CyCOOH               | MeOH           | 72                                  | trace                                |
| 17 <sup>d</sup> | AgSbF <sub>6</sub>       | CyCOOH               | MeOH           | 61                                  | 11                                   |
| 18 <sup>e</sup> | AgSbF <sub>6</sub>       | CyCOOH               | MeOH           | 0                                   | 0                                    |

<sup>a</sup> Reaction conditions: **1a** (0.50 mmol, 2.0 equiv), **2a** (0.25 mmol), [RhCp\*Cl<sub>2</sub>]<sub>2</sub> (5.0 mol%), Ag<sup>+</sup> salt (20 mol%) and additive (2.0 equiv) in solvent (1.0 mL) at 60 °C for 24 h under an N<sub>2</sub> atmosphere. <sup>b</sup> Isolated yields. <sup>c</sup> 40 mol% of AgSbF<sub>6</sub> was used. <sup>d</sup> **1a** (0.25 mmol), **2a** (0.25 mmol), and AgSbF<sub>6</sub> (1.2 equiv). <sup>e</sup> *N,N*-Dimethylaniline or *N*-methylaniline instead of **1a** was used as the substrate. DMF = dimethyl formamide, DCE = 1,2-dichloroethane, *t*-AmOH = *tert*-amyl alcohol, AdCOOH = 1-adamantanecarboxylic acid, CyCOOH = cyclohexanecarboxylic acid.

### III. General procedure for the Rh-catalyzed functionalization of tertiary aniline *N*-oxides **1** with alkynes **2**

A sealable tube with a magnetic stir bar was charged with [RhCp\*Cl<sub>2</sub>]<sub>2</sub> (7.8 mg, 12.5

$\mu\text{mol}$ , 5 mol%),  $\text{AgSbF}_6$  (17.2 mg, 50  $\mu\text{mol}$ , 20 mol%), cyclohexanecarboxylic acid (CyCOOH) (64 mg, 0.5 mmol, 2.0 equiv), tertiary aniline *N*-oxide **1** (0.50 mmol, 2.0 equiv), alkyne **2** (0.25 mmol), and MeOH (1.0 mL) under an  $\text{N}_2$  atmosphere. The reaction mixture was stirred at 60  $^\circ\text{C}$  for 24 h. After being cooled to ambient temperature, the resulting solution was diluted with 5 mL of dichloromethane, filtered through a celite pad and washed with 10-20 mL of dichloromethane. The combined organic phases were evaporated, and the resulting residue was purified by column chromatography on silica gel to provide the desired product.

#### IV. Experimental data for the described substances

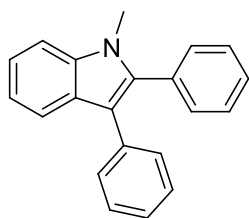

##### 1-Methyl-2,3-diphenyl-1*H*-indole (**3a**)<sup>5</sup>

Following the general procedure. *N,N*-Dimethylaniline oxide **1a** (68.6 mg, 0.50 mmol) and 1,2-diphenylethyne **2a** (44.6 mg, 0.25 mmol) were used. Purification via column chromatography on silica gel (petroleum ether/EtOAc = 100/1, v/v) afforded **3a** as a white solid (50 mg, 70% yield). M.p.: 137-138  $^\circ\text{C}$ .  $^1\text{H}$  NMR (400 MHz,  $\text{CDCl}_3$ ):  $\delta$  = 7.80 (d,  $J$  = 8.0 Hz, 1H), 7.43-7.37 (m, 4H), 7.35-7.29 (m, 5H), 7.27-7.25 (m, 2H), 7.22-7.16 (m, 2H), 3.69 (s, 3H) ppm.  $^{13}\text{C}$  NMR (100 MHz,  $\text{CDCl}_3$ ):  $\delta$  = 137.9, 137.5, 135.4, 132.1, 131.3, 130.0, 128.5, 128.3, 128.2, 127.1, 125.6, 122.3, 120.3, 119.8, 115.3, 109.7, 31.1 ppm. HRMS (ESI): calcd for  $\text{C}_{21}\text{H}_{18}\text{N}$   $[\text{M}+\text{H}]^+$  284.1439, found 284.1433.

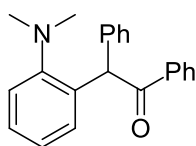

##### 2-(2-(Dimethylamino)phenyl)-1,2-diphenylethanone (**3a'**)

M.p.: 54-56  $^\circ\text{C}$ .  $^1\text{H}$  NMR (400 MHz,  $\text{CDCl}_3$ ):  $\delta$  = 8.05 (d,  $J$  = 7.6 Hz, 2H), 7.48 (t,  $J$  =

7.2 Hz, 1H), 7.41-7.33 (m, 6H), 7.29-7.25 (m, 3H), 7.07-7.02 (m, 2H), 6.48 (s, 1H), 2.51 (s, 6H) ppm.  $^{13}\text{C}$  NMR (100 MHz,  $\text{CDCl}_3$ ):  $\delta$  = 198.1, 151.8, 138.3, 137.7, 137.3, 132.5, 130.03, 129.95, 128.8, 128.5, 128.4, 128.2, 127.2, 124.8, 121.7, 53.8, 44.8 ppm. HRMS (ESI): calcd for  $\text{C}_{22}\text{H}_{21}\text{NNaO}$   $[\text{M}+\text{Na}]^+$  338.1521, found 338.1523.

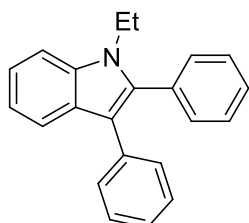

### 1-Ethyl-2,3-diphenyl-1H-indole (**3b**)<sup>5</sup>

Following the general procedure. *N,N*-Diethylaniline oxide **1b** (82.6 mg, 0.50 mmol) and 1,2-diphenylethyne **2a** (44.6 mg, 0.25 mmol) were used. Purification via column chromatography on silica gel (petroleum ether/EtOAc = 100/1, v/v) afforded **3b** as a white solid (42 mg, 57% yield). M.p.: 118-120 °C.  $^1\text{H}$  NMR (400 MHz,  $\text{CDCl}_3$ ):  $\delta$  = 7.82 (d,  $J$  = 8.0 Hz, 1H), 7.45 (d,  $J$  = 8.0 Hz, 1H), 7.39-7.24 (m, 10H), 7.21-7.15 (m, 2H), 4.15 (q,  $J$  = 7.2 Hz, 2H), 1.30 (t,  $J$  = 7.2 Hz, 3H) ppm.  $^{13}\text{C}$  NMR (100 MHz,  $\text{CDCl}_3$ ):  $\delta$  = 137.4, 136.1, 135.3, 132.3, 131.2, 129.9, 128.6, 128.23, 128.22, 127.3, 125.5, 122.1, 120.2, 119.9, 115.3, 109.9, 38.8, 15.6 ppm. HRMS (ESI): calcd for  $\text{C}_{22}\text{H}_{19}\text{NNa}$   $[\text{M}+\text{Na}]^+$  320.1415, found 320.1412.

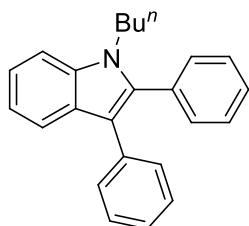

### 1-Butyl-2,3-diphenyl-1H-indole (**3c**)

Following the general procedure. *N,N*-Dibutylaniline oxide **1c** (110.7 mg, 0.50 mmol), 1,2-diphenylethyne **2a** (44.6 mg, 0.25 mmol), and  $\text{AgSbF}_6$  (34.4 mg, 0.10 mmol) were used at 110 °C. Purification via column chromatography on silica gel (petroleum ether/EtOAc = 100/1, v/v) afforded **3c** as a white solid (49 mg, 60% yield). M.p.: 72-74 °C.  $^1\text{H}$  NMR (400 MHz,  $\text{CDCl}_3$ ):  $\delta$  = 7.81 (d,  $J$  = 8.0 Hz, 1H), 7.44 (d,  $J$  = 8.0

Hz, 1H), 7.39-7.24 (m, 10H), 7.20-7.14 (m, 2H), 4.09 (t,  $J = 7.6$  Hz, 2H), 1.71-1.63 (m, 2H), 1.24-1.15 (m, 2H), 0.79 (t,  $J = 7.6$  Hz, 3H) ppm.  $^{13}\text{C}$  NMR (100 MHz,  $\text{CDCl}_3$ ):  $\delta = 137.7, 136.5, 135.4, 132.4, 131.3, 130.0, 128.5, 128.21, 128.17, 127.2, 125.5, 122.1, 120.2, 119.8, 115.3, 110.1, 43.8, 32.2, 20.2, 13.8$  ppm. HRMS (ESI): calcd for  $\text{C}_{24}\text{H}_{24}\text{N}$   $[\text{M}+\text{H}]^+$  326.1909, found 326.1910.

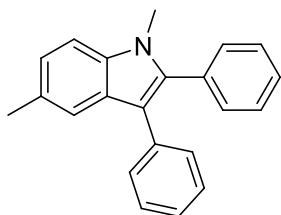

### 1,5-Dimethyl-2,3-diphenyl-1H-indole (**3d**)<sup>5</sup>

Following the general procedure. *N,N*,4-Trimethylaniline oxide **1d** (75.6 mg, 0.50 mmol) and 1,2-diphenylethyne **2a** (44.6 mg, 0.25 mmol) were used. Purification via column chromatography on silica gel (petroleum ether/EtOAc = 100/1, v/v) afforded **3d** as a white solid (54 mg, 72% yield). M.p.: 107-108 °C.  $^1\text{H}$  NMR (400 MHz,  $\text{CDCl}_3$ ):  $\delta = 7.58$  (s, 1H), 7.37 (m, 3H), 7.33-7.26 (m, 7H), 7.19-7.18 (m, 1H), 7.14 (d,  $J = 8.4$  Hz, 1H), 3.67 (s, 3H), 2.48 (s, 3H) ppm.  $^{13}\text{C}$  NMR (100 MHz,  $\text{CDCl}_3$ ):  $\delta = 137.9, 135.8, 135.5, 132.1, 131.2, 130.0, 129.6, 128.5, 128.3, 128.0, 127.2, 125.5, 123.8, 119.2, 114.6, 109.4, 31.1, 21.7$  ppm. HRMS (ESI): calcd for  $\text{C}_{22}\text{H}_{19}\text{NNa}$   $[\text{M}+\text{Na}]^+$  320.1425, found 320.1425.

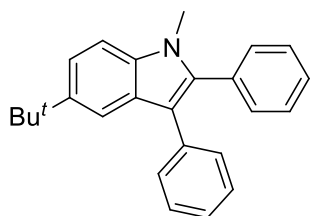

### 5-(*tert*-Butyl)-1-methyl-2,3-diphenyl-1H-indole (**3e**)<sup>6</sup>

Following the general procedure. 4-(*tert*-Butyl)-*N,N*-dimethylaniline oxide **1e** (96.7 mg, 0.50 mmol) and 1,2-diphenylethyne **2a** (44.6 mg, 0.25 mmol) were used. Purification via column chromatography on silica gel (petroleum ether/EtOAc = 100/1, v/v) afforded **3e** as a white solid (44 mg, 52% yield). M.p.: 168-169 °C.  $^1\text{H}$

NMR (400 MHz, CDCl<sub>3</sub>):  $\delta$  = 7.78 (s, 1H), 7.42-7.39 (m, 1H), 7.37-7.35 (m, 4H), 7.32-7.28 (m, 6H), 7.20-7.16 (m, 1H), 3.66 (s, 3H), 1.40 (s, 9H) ppm. <sup>13</sup>C NMR (100 MHz, CDCl<sub>3</sub>):  $\delta$  = 143.4, 138.1, 135.7, 135.6, 132.2, 131.3, 130.0, 128.5, 128.3, 128.1, 126.7, 125.5, 120.6, 115.4, 115.2, 109.3, 34.9, 32.1, 31.1 ppm. HRMS (ESI): calcd for C<sub>25</sub>H<sub>25</sub>NNa [M+Na]<sup>+</sup> 362.1885, found 362.1880.

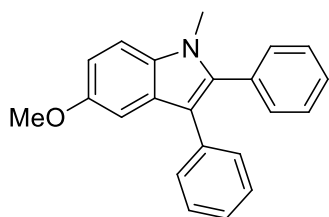

### 5-Methoxy-1-methyl-2,3-diphenyl-1H-indole (**3f**)<sup>5</sup>

Following the general procedure. 4-Methoxy-*N,N*-dimethylaniline oxide **1f** (83.6 mg, 0.50 mmol), 1,2-diphenylethyne **2a** (44.6 mg, 0.25 mmol), and AgSbF<sub>6</sub> (34.4 mg, 0.10 mmol) were used at 110 °C. Purification via column chromatography on silica gel (petroleum ether/EtOAc = 20/1, v/v) afforded **3f** as a white solid (51 mg, 65% yield). M.p.: 132-134 °C. <sup>1</sup>H NMR (400 MHz, CDCl<sub>3</sub>):  $\delta$  = 7.37 (m, 3H), 7.33-7.26 (m, 8H), 7.19 (m, 1H), 6.97 (d, *J* = 8.8 Hz, 1H), 3.86 (s, 3H), 3.67 (s, 3H) ppm. <sup>13</sup>C NMR (100 MHz, CDCl<sub>3</sub>):  $\delta$  = 154.8, 135.5, 132.8, 132.0, 131.2, 129.9, 128.5, 128.4, 128.1, 127.2, 125.5, 114.8, 112.5, 110.5, 110.1, 101.2, 56.2, 31.2 ppm. HRMS (ESI): calcd for C<sub>22</sub>H<sub>19</sub>NNaO [M+Na]<sup>+</sup> 336.1364, found 336.1360.

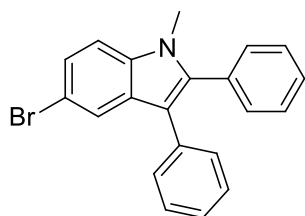

### 5-Bromo-1-methyl-2,3-diphenyl-1H-indole (**3g**)<sup>6</sup>

Following the general procedure. 4-Bromo-*N,N*-dimethylaniline oxide **1g** (108 mg, 0.50 mmol) and 1,2-diphenylethyne **2a** (44.6 mg, 0.25 mmol) were used. Purification via column chromatography on silica gel (petroleum ether/EtOAc = 100/1, v/v) afforded **3g** as a white solid (72 mg, 80% yield). M.p.: 124-126 °C. <sup>1</sup>H NMR (400



MHz, CDCl<sub>3</sub>):  $\delta$  = 7.90 (s, 1H), 7.42-7.37 (m, 4H), 7.33-7.25 (m, 7H), 7.21-7.18 (m, 1H), 3.67 (s, 3H) ppm. <sup>13</sup>C NMR (100 MHz, CDCl<sub>3</sub>):  $\delta$  = 138.9, 136.1, 134.6, 131.5, 131.2, 129.9, 128.8, 128.6, 128.5, 128.4, 126.0, 125.1, 122.2, 114.9, 113.7, 111.2, 31.2 ppm. HRMS (ESI): calcd for C<sub>21</sub>H<sub>16</sub>BrKN [M+K]<sup>+</sup> 400.0103, found 400.0107.

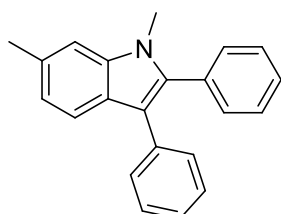

### 1,6-Dimethyl-2,3-diphenyl-1H-indole (**3h**)<sup>7</sup>

Following the general procedure. *N,N*,3-Trimethylaniline oxide **1h** (75.6 mg, 0.50 mmol) and 1,2-diphenylethyne **2a** (44.6 mg, 0.25 mmol) were used. Purification via column chromatography on silica gel (petroleum ether/EtOAc = 100/1, v/v) afforded **3h** as a white solid (45 mg, 60% yield). M.p.: 105-106 °C. <sup>1</sup>H NMR (400 MHz, CDCl<sub>3</sub>):  $\delta$  = 7.68 (d, *J* = 8.0 Hz, 1H), 7.38-7.37 (m, 3H), 7.33-7.24 (m, 6H), 7.21 (s, 1H), 7.16 (t, *J* = 6.8 Hz, 1H), 7.03 (d, *J* = 8.0 Hz, 1H), 3.65 (s, 3H), 2.55 (s, 3H) ppm. <sup>13</sup>C NMR (100 MHz, CDCl<sub>3</sub>):  $\delta$  = 137.9, 137.2, 135.5, 132.2, 131.3, 129.9, 128.5, 128.3, 128.0, 125.5, 124.9, 122.0, 119.4, 115.0, 109.7, 31.0, 22.1 ppm. HRMS (ESI): calcd for C<sub>22</sub>H<sub>19</sub>NNa [M+Na]<sup>+</sup> 340.1415, found 340.1416

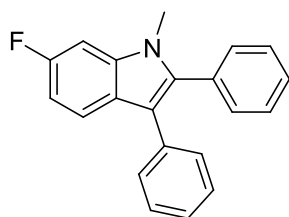

### 6-Fluoro-1-methyl-2,3-diphenyl-1H-indole (**3i**)

Following the general procedure. 3-Fluoro-*N,N*-dimethylaniline oxide **1i** (77.6 mg, 0.50 mmol) and 1,2-diphenylethyne **2a** (44.6 mg, 0.25 mmol) were used. Purification via column chromatography on silica gel (petroleum ether/EtOAc = 100/1, v/v) afforded **3i** as a white solid (40 mg, 53% yield). M.p.: 138-140 °C. <sup>1</sup>H NMR (400 MHz, CDCl<sub>3</sub>):  $\delta$  = 7.36 (m, 3H), 7.28-7.16 (m, 9H), 6.86-6.82 (m, 1H), 3.68 (s, 3H)

ppm.  $^{13}\text{C}$  NMR (100 MHz,  $\text{CDCl}_3$ ):  $\delta = 158.3, 155.8, 140.0, 139.9, 138.33, 138.32, 134.91, 134.90, 131.4, 131.3, 131.2, 130.99, 130.96, 129.9, 128.6, 128.5, 128.4, 128.3, 127.6, 125.9, 122.4, 122.3, 115.7, 115.5, 113.7, 113.6, 105.8, 105.7, 105.5, 31.61$  ppm. HRMS (ESI): calcd for  $\text{C}_{21}\text{H}_{16}\text{FNNa}$   $[\text{M}+\text{Na}]^+$  324.1164, found 324.1158.

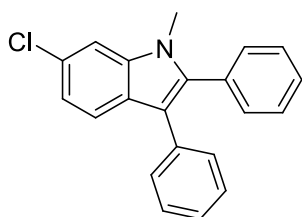

### 6-Chloro-1-methyl-2,3-diphenyl-1H-indole (**3j**)<sup>6</sup>

Following the general procedure. 3-Chloro-*N,N*-dimethylaniline oxide **1j** (85.8 mg, 0.50 mmol) and 1,2-diphenylethyne **2a** (44.6 mg, 0.25 mmol) were used. Purification via column chromatography on silica gel (petroleum ether/EtOAc = 100/1, v/v) afforded **3j** as a white solid (52 mg, 66% yield). M.p.: 140 °C.  $^1\text{H}$  NMR (400 MHz,  $\text{CDCl}_3$ ):  $\delta = 7.68$  (d,  $J = 8.4$  Hz, 1H), 7.40-7.38 (m, 4H), 7.33-7.26 (m, 6H), 7.22-7.17 (m, 1H), 7.14 (d,  $J = 8.4$  Hz, 1H), 3.64 (s, 3H) ppm.  $^{13}\text{C}$  NMR (100 MHz,  $\text{CDCl}_3$ ):  $\delta = 138.4, 137.9, 134.8, 131.6, 131.2, 129.9, 128.6, 128.41, 128.39, 128.1, 125.9, 125.7, 120.9, 120.7, 115.4, 109.7, 31.2$  ppm. HRMS (ESI): calcd for  $\text{C}_{21}\text{H}_{16}\text{ClNNa}$   $[\text{M}+\text{Na}]^+$  340.0869, found 340.0873.

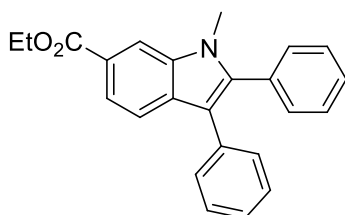

### Ethyl 1-methyl-2,3-diphenyl-1H-indole-6-carboxylate (**3k**)

Following the general procedure. 3-(Ethoxycarbonyl)-*N,N*-dimethylaniline oxide **1k** (104.6 mg, 0.50 mmol), 1,2-diphenylethyne **2a** (44.6 mg, 0.25 mmol), and  $\text{AgSbF}_6$  (34.4 mg, 0.10 mmol) were used at 110 °C. Purification via column chromatography on silica gel (petroleum ether/EtOAc = 20/1, v/v) afforded **3k** as a white solid (55 mg, 62% yield). M.p.: 138-140 °C.  $^1\text{H}$  NMR (400 MHz,  $\text{CDCl}_3$ ):  $\delta = 8.19$  (s, 1H), 7.88 (d,

$J = 8.4$  Hz, 1H), 7.79 (d,  $J = 8.4$  Hz, 1H), 7.40 (m, 3H), 7.35-7.32 (m, 2H), 7.29-7.28 (m, 4H), 7.23-7.19 (m, 1H), 4.45 (q,  $J = 7.2$  Hz, 2H), 3.76 (s, 3H), 1.46 (t,  $J = 7.2$  Hz, 3H) ppm.  $^{13}\text{C}$  NMR (100 MHz,  $\text{CDCl}_3$ ):  $\delta = 167.9, 141.0, 136.8, 134.7, 131.4, 131.1, 130.5, 129.9, 128.64, 128.60, 128.4, 126.0, 124.0, 121.3, 119.2, 115.7, 112.1, 110.1, 60.9, 31.3, 14.6$  ppm. HRMS (ESI): calcd for  $\text{C}_{24}\text{H}_{21}\text{NNaO}_2$   $[\text{M}+\text{Na}]^+$  378.1470, found 378.1464.

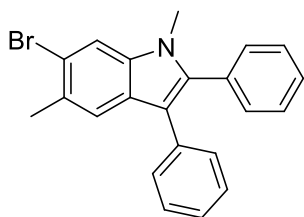

### 6-Bromo-1,5-dimethyl-2,3-diphenyl-1H-indole (3l)

Following the general procedure. 3-Bromo-*N,N*,4-trimethylaniline oxide **1l** (115 mg, 0.50 mmol) and 1,2-diphenylethyne **2a** (44.6 mg, 0.25 mmol) were used. Purification via column chromatography on silica gel (petroleum ether/EtOAc = 100/1, v/v) afforded **3l** as a white solid (58 mg, 62% yield). M.p.: 176-178 °C.  $^1\text{H}$  NMR (400 MHz,  $\text{CDCl}_3$ ):  $\delta = 7.61$  (s, 2H), 7.38-7.37 (m, 3H), 7.32-7.25 (m, 6H), 7.20-7.17 (m, 1H), 3.63 (s, 3H), 2.50 (s, 3H) ppm.  $^{13}\text{C}$  NMR (100 MHz,  $\text{CDCl}_3$ ):  $\delta = 138.4, 136.9, 135.0, 131.6, 131.2, 129.9, 129.0, 128.6, 128.4, 128.3, 126.7, 125.8, 120.6, 118.8, 114.8, 113.3, 31.2, 23.3$  ppm. HRMS (ESI): calcd for  $\text{C}_{22}\text{H}_{19}\text{BrN}$   $[\text{M}+\text{H}]^+$  376.0701, found 376.0695.

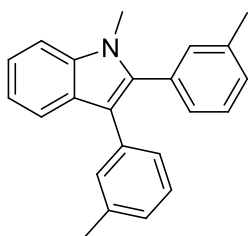

### 1-Methyl-2,3-di-*m*-tolyl-1H-indole (4a)

Following the general procedure. *N,N*-Dimethylaniline oxide **1a** (68.6 mg, 0.50 mmol) and 1,2-di-*m*-tolylethyne **2b** (51.6 mg, 0.25 mmol) were used. Purification via column chromatography on silica gel (petroleum ether/EtOAc = 100/1, v/v) afforded **4a** as a

white solid (53 mg, 68% yield). M.p.: 94 °C. <sup>1</sup>H NMR (400 MHz, CDCl<sub>3</sub>): δ = 7.81 (d, *J* = 8.0 Hz, 1H), 7.41 (d, *J* = 8.4 Hz, 1H), 7.30 (t, *J* = 7.2 Hz, 1H), 7.26-7.25 (m, 1H), 7.21-7.11 (m, 6H), 7.06 (d, *J* = 7.6 Hz, 1H), 6.99 (d, *J* = 7.2 Hz, 1H), 3.67 (s, 3H), 2.36 (s, 3H), 2.30 (s, 3H) ppm. <sup>13</sup>C NMR (100 MHz, CDCl<sub>3</sub>): δ = 138.02, 138.00, 137.61, 137.4, 135.3, 132.0, 131.8, 130.6, 128.9, 128.5, 128.3, 128.1, 127.2, 127.1, 126.4, 122.1, 120.2, 119.8, 115.1, 109.6, 31.1, 21.7, 21.6 ppm. HRMS (ESI): calcd for C<sub>23</sub>H<sub>21</sub>NNa [M+Na]<sup>+</sup> 334.1572, found 334.1570.

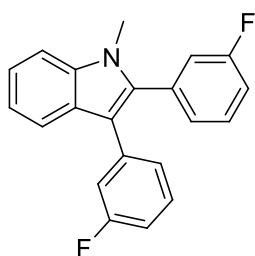

#### 2,3-Bis(3-fluorophenyl)-1-methyl-1H-indole (4b)

Following the general procedure. *N,N*-Dimethylaniline oxide **1a** (68.6 mg, 0.50 mmol) and 1,2-bis(3-fluorophenyl)ethyne **2c** (53.6 mg, 0.25 mmol) were used. Purification via column chromatography on silica gel (petroleum ether/EtOAc = 100/1, v/v) afforded **4b** as a white solid (57 mg, 72% yield). M.p.: 106-108 °C. <sup>1</sup>H NMR (400 MHz, CDCl<sub>3</sub>): δ = 7.78 (d, *J* = 8.0 Hz, 1H), 7.43 (d, *J* = 8.4 Hz, 1H), 7.41-7.33 (m, 2H), 7.27-7.21 (m, 2H), 7.13-6.99 (m, 5H), 6.90 (t, *J* = 8.0 Hz, 1H), 3.69 (s, 3H) ppm. <sup>13</sup>C NMR (100 MHz, CDCl<sub>3</sub>): δ = 164.2, 164.0, 161.8, 161.5, 137.5, 137.33, 137.25, 136.64, 136.62, 133.9, 133.8, 130.3, 130.2, 129.83, 129.75, 127.08, 127.05, 126.7, 125.63, 125.60, 122.9, 120.8, 119.7, 118.2, 118.0, 116.6, 116.4, 115.6, 115.4, 114.7, 114.6, 112.9, 112.7, 109.9, 31.1 ppm. HRMS (ESI): calcd for C<sub>21</sub>H<sub>16</sub>F<sub>2</sub>N [M+H]<sup>+</sup> 320.1251, found 320.1247.

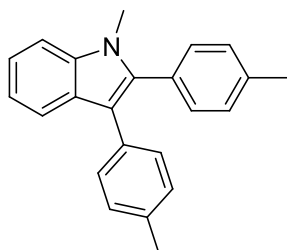

### 1-Methyl-2,3-di-*p*-tolyl-1*H*-indole (**4c**)<sup>5</sup>

Following the general procedure. *N,N*-Dimethylaniline oxide **1a** (68.6 mg, 0.50 mmol) and 1,2-di-*p*-tolylethyne **2d** (51.6 mg, 0.25 mmol) were used. Purification via column chromatography on silica gel (petroleum ether/EtOAc = 100/1, v/v) afforded **4a** as a white solid (40 mg, 52% yield). M.p.: 108-110 °C. <sup>1</sup>H NMR (400 MHz, CDCl<sub>3</sub>): δ = 7.78 (d, *J* = 8.0 Hz, 1H), 7.40 (d, *J* = 8.4 Hz, 1H), 7.31-7.16 (m, 8H), 7.10 (d, *J* = 8.0 Hz, 2H), 3.67 (s, 3H), 2.40 (s, 3H), 2.34 (s, 3H) ppm. <sup>13</sup>C NMR (100 MHz, CDCl<sub>3</sub>): δ = 137.9, 137.8, 137.4, 135.0, 132.5, 131.1, 129.8, 129.2, 129.13, 129.05, 127.2, 122.1, 120.1, 119.7, 114.9, 109.6, 31.0, 21.5, 21.3 ppm. HRMS (ESI): calcd for C<sub>23</sub>H<sub>21</sub>NNa [M+Na]<sup>+</sup> 334.1572, found 334.1570.

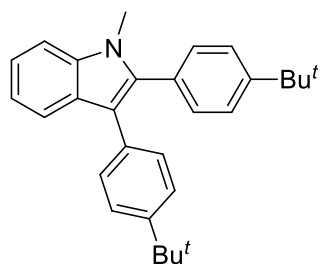

### 2,3-Bis(4-(*tert*-butyl)phenyl)-1-methyl-1*H*-indole (**4d**)<sup>5</sup>

Following the general procedure. *N,N*-Dimethylaniline oxide **1a** (68.6 mg, 0.50 mmol) and 1,2-bis(4-(*tert*-butyl)phenyl)ethyne **2e** (72.6 mg, 0.25 mmol) were used. Purification via column chromatography on silica gel (petroleum ether/EtOAc = 100/1, v/v) afforded **4d** as a white solid (47 mg, 48% yield). M.p.: 180-182 °C. <sup>1</sup>H NMR (400 MHz, CDCl<sub>3</sub>): δ = 7.82 (d, *J* = 7.6 Hz, 1H), 7.40 (d, *J* = 8.4 Hz, 3H), 7.30-7.24 (m, 7H), 7.17 (t, *J* = 7.6 Hz, 1H), 3.66 (s, 3H), 1.36 (s, 9H), 1.32 (s, 9H) ppm. <sup>13</sup>C NMR (100 MHz, CDCl<sub>3</sub>): δ = 151.0, 148.1, 137.8, 137.4, 132.4, 130.9, 129.5, 129.1, 127.3, 125.3, 125.1, 122.0, 120.0, 119.9, 114.8, 109.6, 34.8, 34.6, 31.6, 31.5, 31.1 ppm. HRMS (ESI): calcd for C<sub>29</sub>H<sub>34</sub>N [M+H]<sup>+</sup> 396.2691, found 396.2696.

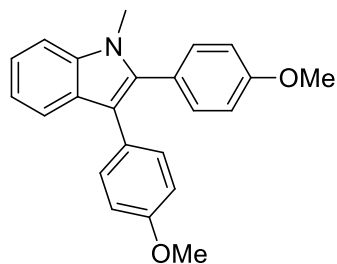

### 2,3-Bis(4-methoxyphenyl)-1-methyl-1H-indole (**4e**)<sup>5</sup>

Following the general procedure. *N,N*-Dimethylaniline oxide **1a** (68.6 mg, 0.50 mmol) and 1,2-bis(4-methoxyphenyl)ethyne **2f** (59.6 mg, 0.25 mmol) were used. Purification via column chromatography on silica gel (petroleum ether/EtOAc = 20/1, v/v) afforded **4e** as a white solid (34 mg, 40% yield). M.p.: 116-118 °C. <sup>1</sup>H NMR (400 MHz, CDCl<sub>3</sub>): δ = 7.75 (d, *J* = 7.6 Hz, 1H), 7.39 (d, *J* = 8.0 Hz, 1H), 7.30-7.22 (m, 5H), 7.17 (t, *J* = 7.6 Hz, 1H), 6.92 (d, *J* = 8.4 Hz, 2H), 6.84 (d, *J* = 8.4 Hz, 2H), 3.85 (s, 3H), 3.80 (s, 3H), 3.67 (s, 3H) ppm. <sup>13</sup>C NMR (100 MHz, CDCl<sub>3</sub>): δ = 159.4, 157.6, 137.4, 137.3, 132.5, 131.0, 127.9, 127.3, 124.4, 122.0, 120.1, 119.6, 114.5, 114.0, 113.8, 109.6, 55.4, 55.3, 31.0 ppm. HRMS (ESI): calcd for C<sub>23</sub>H<sub>22</sub>NO<sub>2</sub> [M+H]<sup>+</sup> 344.1651, found 344.1652.

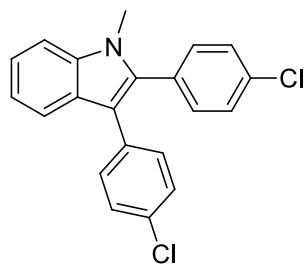

### 2,3-Bis(4-chlorophenyl)-1-methyl-1H-indole (**4f**)<sup>7</sup>

Following the general procedure. *N,N*-Dimethylaniline oxide **1a** (68.6 mg, 0.50 mmol) and 1,2-bis(4-chlorophenyl)ethyne **2g** (61.8 mg, 0.25 mmol) were used. Purification via column chromatography on silica gel (petroleum ether/EtOAc = 100/1, v/v) afforded **4f** as a white solid (58 mg, 66% yield). M.p.: 142-144 °C. <sup>1</sup>H NMR (400 MHz, CDCl<sub>3</sub>): δ = 7.72 (d, *J* = 8.0 Hz, 1H), 7.41 (d, *J* = 8.4 Hz, 1H), 7.39-7.37 (m, 2H), 7.32 (t, *J* = 7.6 Hz, 1H), 7.27-7.19 (m, 7H), 3.67 (s, 3H) ppm. <sup>13</sup>C NMR (100 MHz, CDCl<sub>3</sub>): δ = 137.6, 136.6, 134.6, 133.6, 132.5, 131.6, 131.2, 130.2, 129.0,

128.7, 126.8, 122.8, 120.7, 119.5, 114.5, 109.9, 31.1 ppm. HRMS (ESI): calcd for  $C_{21}H_{15}Cl_2KN$   $[M+K]^+$  390.0219, found 390.0252.

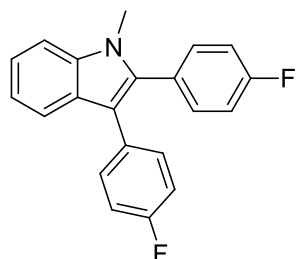

### 2,3-Bis(4-fluorophenyl)-1-methyl-1H-indole (**4g**)

Following the general procedure. *N,N*-Dimethylaniline oxide **1a** (68.6 mg, 0.50 mmol) and 1,2-bis(4-fluorophenyl)ethyne **2h** (53.6 mg, 0.25 mmol) were used. Purification via column chromatography on silica gel (petroleum ether/EtOAc = 100/1, v/v) afforded **4g** as a white solid (46 mg, 58% yield). M.p.: 133-134 °C.  $^1H$  NMR (400 MHz,  $CDCl_3$ ):  $\delta$  = 7.72 (d,  $J$  = 8.0 Hz, 1H), 7.42 (d,  $J$  = 8.0 Hz, 1H), 7.34-7.19 (m, 6H), 7.10 (t,  $J$  = 8.8 Hz, 2H), 6.98 (t,  $J$  = 8.8 Hz, 2H), 3.67 (s, 3H) ppm.  $^{13}C$  NMR (100 MHz,  $CDCl_3$ ):  $\delta$  = 164.0, 162.5, 161.5, 160.34, 160.33, 160.1, 151.5, 137.4, 136.7, 133.0, 132.9, 131.4, 131.3, 131.09, 131.06, 127.9, 127.8, 127.0, 122.6, 120.5, 119.5, 115.9, 115.7, 115.5, 115.2, 114.5, 109.8, 31.0 ppm. HRMS (ESI): calcd for  $C_{21}H_{16}F_2N$   $[M+H]^+$  320.1251, found 320.1254.

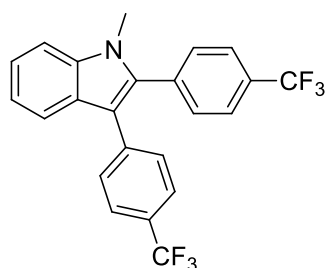

### 1-Methyl-2,3-bis(4-(trifluoromethyl)phenyl)-1H-indole (**4h**)<sup>7</sup>

Following the general procedure. *N,N*-Dimethylaniline oxide **1a** (68.6 mg, 0.50 mmol), 1,2-bis(4-(trifluoromethyl)phenyl)ethyne **2i** (78.6 mg, 0.25 mmol), and  $AgSbF_6$  (34.4 mg, 0.10 mmol) were used at 110 °C. Purification via column chromatography on silica gel (petroleum ether/EtOAc = 100/1, v/v) afforded **4h** as a

white solid (64 mg, 61% yield). M.p.: 136-138 °C. <sup>1</sup>H NMR (400 MHz, CDCl<sub>3</sub>): δ = 7.77 (d, *J* = 8.0 Hz, 1H), 7.68 (d, *J* = 7.6 Hz, 2H), 7.55 (d, *J* = 8.0 Hz, 2H), 7.46 (d, *J* = 7.6 Hz, 3H), 7.39-7.35 (m, 3H), 7.25 (t, *J* = 7.6 Hz, 1H), 3.71 (s, 3H) ppm. <sup>13</sup>C NMR (100 MHz, CDCl<sub>3</sub>): δ = 138.8, 137.8, 136.7, 135.8, 135.3, 131.5, 130.7, 130.4, 130.0, 128.1, 127.8, 126.7, 125.8, 125.7, 125.6, 125.52, 125.48, 125.4, 123.2, 122.8, 121.1, 119.6, 114.9, 110.1, 31.3 ppm. HRMS (ESI): calcd for C<sub>23</sub>H<sub>16</sub>F<sub>6</sub>N [M+H]<sup>+</sup> 420.1187, found 420.1192.

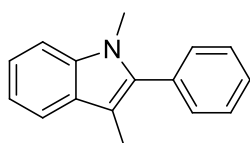

### 1,3-Dimethyl-2-phenyl-1*H*-indole (**4i**)<sup>7</sup>

Following the general procedure. *N,N*-Dimethylaniline oxide **1a** (68.6 mg, 0.50 mmol), prop-1-yn-1-ylbenzene **2j** (31.3 μL, 0.25 mmol), and AgSbF<sub>6</sub> (34.4 mg, 0.10 mmol) were used at 110 °C. Purification via column chromatography on silica gel (petroleum ether/EtOAc = 100/1, v/v) afforded **4i** as a white solid (29 mg, 52% yield). M.p.: 62-64 °C. <sup>1</sup>H NMR (400 MHz, CDCl<sub>3</sub>): δ = 7.64 (d, *J* = 7.6 Hz, 1H), 7.53-7.50 (m, 2H), 7.45-7.42 (m, 3H), 7.36 (d, *J* = 8.0 Hz, 1H), 7.29 (t, *J* = 7.6 Hz, 1H), 7.19 (t, *J* = 7.6 Hz, 1H), 3.64 (s, 3H), 2.32 (s, 3H) ppm. <sup>13</sup>C NMR (100 MHz, CDCl<sub>3</sub>): δ = 137.8, 137.3, 132.2, 130.8, 128.51, 128.45, 127.9, 121.8, 119.2, 118.9, 109.4, 108.6, 31.1, 9.5 ppm. HRMS (ESI): calcd for C<sub>16</sub>H<sub>16</sub>N [M+H]<sup>+</sup> 222.1283, found 222.1276.

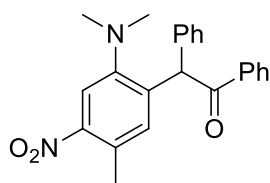

### 2-(2-(Dimethylamino)-5-methyl-4-nitrophenyl)-1,2-diphenylethanone (**5a**)

Following the general procedure. *N,N,N*,4-Trimethyl-3-nitroaniline oxide **1o** (98.1 mg, 0.50 mmol) and 1,2-diphenylethyne **2a** (44.6 mg, 0.25 mmol) were used. Purification via column chromatography on silica gel (petroleum ether/EtOAc = 30/1, v/v) afforded **5a** as a yellow solid (60 mg, 64% yield). M.p.: 128-130 °C. <sup>1</sup>H NMR (400



MHz, CDCl<sub>3</sub>):  $\delta$  = 8.02 (d,  $J$  = 8.0 Hz, 2H), 7.87 (s, 1H), 7.52 (t,  $J$  = 7.2 Hz, 1H), 7.44-7.36 (m, 4H), 7.33-7.29 (m, 3H), 6.97 (s, 1H), 6.49 (s, 1H), 2.54 (s, 6H), 2.47 (s, 3H) ppm. <sup>13</sup>C NMR (100 MHz, CDCl<sub>3</sub>):  $\delta$  = 197.5, 150.8, 148.3, 143.0, 137.2, 137.1, 134.5, 133.0, 130.0, 129.7, 129.2, 128.7, 128.5, 127.8, 118.2, 53.7, 44.8, 20.7 ppm. HRMS (ESI): calcd for C<sub>23</sub>H<sub>22</sub>N<sub>2</sub>NaO<sub>3</sub> [M+Na]<sup>+</sup> 397.1528, found 397.1527.

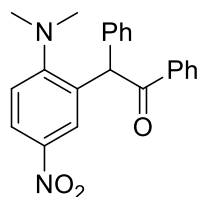

### 2-(2-(Dimethylamino)-5-nitrophenyl)-1,2-diphenylethanone (**5b**)

Following the general procedure. *N,N*-Dimethyl-4-nitroaniline oxide **1p** (91.1 mg, 0.50 mmol) and 1,2-diphenylethyne **2a** (44.6 mg, 0.25 mmol) were used. Purification via column chromatography on silica gel (petroleum ether/EtOAc = 30/1, v/v) afforded **5b** as a yellow solid (56 mg, 62% yield). M.p.: 162-164 °C. <sup>1</sup>H NMR (400 MHz, CDCl<sub>3</sub>):  $\delta$  = 8.08 (s, 1H), 8.02 (d,  $J$  = 7.6 Hz, 2H), 7.90 (d,  $J$  = 8.4 Hz, 1H), 7.52 (t,  $J$  = 7.2 Hz, 1H), 7.44-7.29 (m, 7H), 7.17 (d,  $J$  = 8.4 Hz, 1H), 6.50 (s, 1H), 2.57 (s, 6H) ppm. <sup>13</sup>C NMR (100 MHz, CDCl<sub>3</sub>):  $\delta$  = 197.4, 153.1, 147.9, 144.9, 137.10, 137.08, 133.1, 131.3, 129.7, 129.3, 128.8, 128.4, 127.9, 119.6, 116.9, 54.1, 44.7 ppm. HRMS (ESI): calcd for C<sub>22</sub>H<sub>20</sub>N<sub>2</sub>NaO<sub>3</sub> [M+Na]<sup>+</sup> 383.1372, found 383.1366.

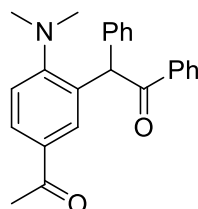

### 2-(5-Acetyl-2-(dimethylamino)phenyl)-1,2-diphenylethanone (**5c**)

Following the general procedure. 4-Acetyl-*N,N*-dimethylaniline oxide **1q** (89.6 mg, 0.50 mmol) and 1,2-diphenylethyne **2a** (44.6 mg, 0.25 mmol) were used. Purification via column chromatography on silica gel (petroleum ether/EtOAc = 5/1, v/v) afforded

**5c** as greenish yellow oil (64 mg, 72% yield).  $^1\text{H}$  NMR (400 MHz,  $\text{CDCl}_3$ ):  $\delta$  = 8.03 (d,  $J$  = 7.6 Hz, 2H), 7.86 (d,  $J$  = 8.4 Hz, 1H), 7.67 (s, 1H), 7.49 (t,  $J$  = 7.2 Hz, 1H), 7.41-7.29 (m, 7H), 7.26-7.24 (m, 1H), 6.47 (s, 1H), 2.61 (s, 6H), 2.45 (s, 3H) ppm.  $^{13}\text{C}$  NMR (100 MHz,  $\text{CDCl}_3$ ):  $\delta$  = 198.2, 197.4, 156.7, 138.0, 137.2, 135.7, 133.0, 132.9, 131.2, 129.7, 129.0, 128.6, 128.5, 127.5, 120.9, 53.9, 44.6, 26.6 ppm. HRMS (ESI): calcd for  $\text{C}_{24}\text{H}_{23}\text{NNaO}_2$   $[\text{M}+\text{Na}]^+$  380.1626, found 380.1622.

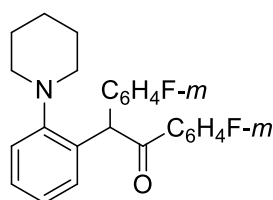

### 1,2-Bis(3-fluorophenyl)-2-(2-(piperidin-1-yl)phenyl)ethanone (**5d**)

Following the general procedure. 1-Phenylpiperidine 1-oxide **1r** (88.6 mg, 0.50 mmol) and 1,2-bis(3-fluorophenyl)ethyne **2c** (53.6 mg, 0.25 mmol) were used. Purification via column chromatography on silica gel (petroleum ether/EtOAc = 50/1, v/v) afforded **5d** as a white solid (73 mg, 75% yield). M.p.: 100-102 °C.  $^1\text{H}$  NMR (400 MHz,  $\text{CDCl}_3$ ):  $\delta$  = 7.86 (d,  $J$  = 8.0 Hz, 1H), 7.81 (d,  $J$  = 10 Hz, 1H), 7.39-7.17 (m, 5H), 7.11-6.95 (m, 5H), 6.56 (s, 1H), 2.84-2.65 (m, 4H), 1.63-1.44 (m, 6H) ppm.  $^{13}\text{C}$  NMR (100 MHz,  $\text{CDCl}_3$ ):  $\delta$  = 196.72, 196.70, 164.3, 164.1, 161.9, 161.7, 152.1, 140.93, 140.86, 138.94, 138.88, 134.6, 130.19, 130.18, 130.12, 130.09, 129.8, 128.7, 125.34, 125.31, 124.7, 124.57, 124.54, 122.2, 120.1, 119.9, 116.8, 116.5, 115.9, 115.7, 114.4, 114.2, 53.28, 53.26, 26.6, 24.2 ppm. HRMS (ESI): calcd for  $\text{C}_{25}\text{H}_{23}\text{F}_2\text{NNaO}$   $[\text{M}+\text{Na}]^+$  414.1645, found 414.1640.

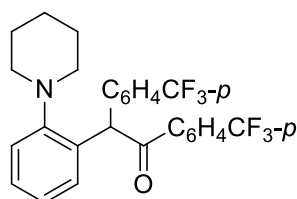

### 2-(2-(Piperidin-1-yl)phenyl)-1,2-bis(4-(trifluoromethyl)phenyl)ethanone (**5e**)

Following the general procedure. 1-Phenylpiperidine 1-oxide **1r** (88.6 mg, 0.50 mmol) and 1,2-bis(4-(trifluoromethyl)phenyl)ethyne **2i** (78.6 mg, 0.25 mmol) were used.

Purification via column chromatography on silica gel (petroleum ether/EtOAc = 40/1, v/v) afforded **5e** as a white solid (91 mg, 74% yield). M.p.: 128-130 °C. <sup>1</sup>H NMR (400 MHz, CDCl<sub>3</sub>): δ = 8.19 (d, *J* = 8.0 Hz, 2H), 7.65 (d, *J* = 8.0 Hz, 2H), 7.60 (d, *J* = 7.6 Hz, 2H), 7.43 (d, *J* = 8.0 Hz, 2H), 7.29-7.25 (m, 2H), 7.08-7.07 (m, 2H), 6.67 (s, 1H), 2.83-2.49 (m, 4H), 1.65-1.42 (m, 6H) ppm. <sup>13</sup>C NMR (100 MHz, CDCl<sub>3</sub>): δ = 196.9, 152.3, 142.4, 139.4, 135.0, 134.6, 134.3, 134.0, 130.10, 130.09, 129.90, 129.89, 129.87, 129.86, 129.6, 129.4, 129.3, 129.1, 125.83, 125.80, 125.77, 125.2, 125.0, 123.0, 122.6, 122.4, 53.7, 26.8, 24.3 ppm. HRMS (ESI): calcd for C<sub>27</sub>H<sub>23</sub>F<sub>6</sub>NNaO [M+Na]<sup>+</sup> 514.1582, found 514.1577.

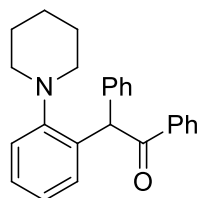

#### 1,2-Diphenyl-2-(2-(piperidin-1-yl)phenyl)ethanone (**5f**)

Following the general procedure. 1-Phenylpiperidine 1-oxide **1r** (88.6 mg, 0.50 mmol) and 1,2-diphenylethyne **2a** (44.6 mg, 0.25 mmol) were used. Purification via column chromatography on silica gel (petroleum ether/EtOAc = 50/1, v/v) afforded **5f** as a white solid (74 mg, 83% yield). M.p.: 102-104 °C. <sup>1</sup>H NMR (400 MHz, CDCl<sub>3</sub>): δ = 8.11 (d, *J* = 7.6 Hz, 2H), 7.48 (t, *J* = 7.6 Hz, 1H), 7.39 (t, *J* = 7.6 Hz, 2H), 7.34-7.33 (m, 4H), 7.29-7.21 (m, 3H), 7.11-7.03 (m, 2H), 6.62 (s, 1H), 2.86-2.68 (m, 4H), 1.57-1.51 (m, 6H) ppm. <sup>13</sup>C NMR (100 MHz, CDCl<sub>3</sub>): δ = 198.5, 152.2, 138.6, 137.2, 136.3, 132.8, 130.1, 129.7, 129.0, 128.8, 128.5, 128.2, 127.1, 124.6, 122.0, 53.6, 26.5, 24.3 ppm. HRMS (ESI): calcd for C<sub>25</sub>H<sub>25</sub>NNaO [M+Na]<sup>+</sup> 378.1834, found 378.1829.

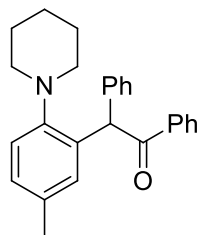

#### 2-(5-Methyl-2-(piperidin-1-yl)phenyl)-1,2-diphenylethanone (**5g**)

Following the general procedure. 1-(*p*-Tolyl)piperidine 1-oxide **1s** (95.7 mg, 0.50 mmol) and 1,2-diphenylethyne **2a** (44.6 mg, 0.25 mmol) were used. Purification via column chromatography on silica gel (petroleum ether/EtOAc = 50/1, v/v) afforded **5g** as a white solid (75 mg, 81% yield). M.p.: 132-134 °C. <sup>1</sup>H NMR (400 MHz, CDCl<sub>3</sub>): δ = 8.11 (d, *J* = 8.0 Hz, 2H), 7.48 (t, *J* = 7.2 Hz, 1H), 7.38 (t, *J* = 7.6 Hz, 2H), 7.33 (m, 4H), 7.26 (m, 1H), 7.12 (d, *J* = 8.0 Hz, 1H), 7.05 (d, *J* = 7.6 Hz, 1H), 6.90 (s, 1H), 6.61 (s, 1H), 2.80-2.61 (m, 4H), 2.22 (s, 3H), 1.56-1.49 (m, 6H) ppm. <sup>13</sup>C NMR (100 MHz, CDCl<sub>3</sub>): δ = 198.6, 149.7, 138.7, 137.2, 136.0, 134.1, 132.8, 130.5, 129.7, 129.0, 128.9, 128.7, 128.5, 127.1, 121.9, 53.5, 26.6, 24.3, 21.2 ppm. HRMS (ESI): calcd for C<sub>26</sub>H<sub>27</sub>NNaO [M+Na]<sup>+</sup> 392.1990, found 392.1986.

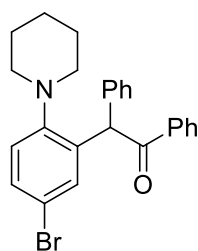

### 2-(5-Bromo-2-(piperidin-1-yl)phenyl)-1,2-diphenylethanone (**5h**)

Following the general procedure. 1-(4-Bromophenyl)piperidine 1-oxide **1t** (128 mg, 0.50 mmol) and 1,2-diphenylethyne **2a** (44.6 mg, 0.25 mmol) were used. Purification via column chromatography on silica gel (petroleum ether/EtOAc = 50/1, v/v) afforded **5h** as a white solid (100 mg, 92% yield). M.p.: 108-110 °C. <sup>1</sup>H NMR (400 MHz, CDCl<sub>3</sub>): δ = 8.08 (d, *J* = 7.6 Hz, 2H), 7.50 (t, *J* = 7.6 Hz, 1H), 7.42-7.28 (m, 8H), 7.14 (s, 1H), 7.09 (d, *J* = 8.4 Hz, 1H), 6.52 (s, 1H), 2.79-2.63 (m, 4H), 1.56-1.43 (m, 6H) ppm. <sup>13</sup>C NMR (100 MHz, CDCl<sub>3</sub>): δ = 197.8, 151.3, 139.1, 137.6, 137.0, 133.00, 132.95, 131.2, 129.6, 129.1, 129.0, 128.6, 127.5, 123.9, 118.1, 53.5, 26.4, 24.1 ppm. HRMS (ESI): calcd for C<sub>25</sub>H<sub>24</sub>BrNNaO [M+Na]<sup>+</sup> 456.0939, found 456.0942

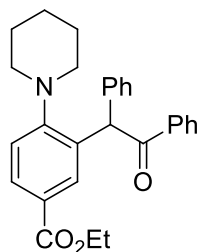

### Ethyl 3-(2-oxo-1,2-diphenylethyl)-4-(piperidin-1-yl)benzoate (**5i**)

Following the general procedure. 1-(4-(Ethoxycarbonyl)phenyl)piperidine 1-oxide **1u** (125 mg, 0.50 mmol) and 1,2-diphenylethyne **2a** (44.6 mg, 0.25 mmol) were used. Purification via column chromatography on silica gel (petroleum ether/EtOAc = 20/1, v/v) afforded **5i** as a white solid (90 mg, 84% yield). M.p.: 132 °C. <sup>1</sup>H NMR (400 MHz, CDCl<sub>3</sub>): δ = 8.07 (d, *J* = 7.6 Hz, 2H), 7.92 (d, *J* = 8.4 Hz, 1H), 7.81 (s, 1H), 7.48 (t, *J* = 7.2 Hz, 1H), 7.40-7.31 (m, 6H), 7.29-7.26 (m, 1H), 7.21 (d, *J* = 8.4 Hz, 1H), 6.54 (s, 1H), 4.28 (q, *J* = 7.2 Hz, 2H), 2.91-2.88 (m, 2H), 2.70 (m, 2H), 1.60-1.51 (m, 6H), 1.31 (t, *J* = 7.2 Hz, 3H) ppm. <sup>13</sup>C NMR (100 MHz, CDCl<sub>3</sub>): δ = 198.0, 166.5, 156.5, 138.2, 137.0, 135.5, 133.0, 131.7, 129.9, 129.5, 129.0, 128.6, 127.4, 126.2, 121.3, 60.9, 54.1, 53.6, 26.5, 24.2, 14.5 ppm. HRMS (ESI): calcd for C<sub>28</sub>H<sub>29</sub>NNaO<sub>3</sub> [M+Na]<sup>+</sup> 450.2045, found 450.2045.

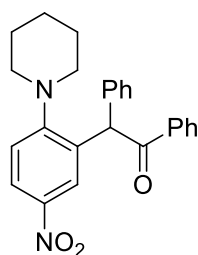

### 2-(5-Nitro-2-(piperidin-1-yl)phenyl)-1,2-diphenylethanone (**5j**)

Following the general procedure. 1-(4-Nitrophenyl)piperidine 1-oxide **1v** (111 mg, 0.50 mmol) and 1,2-diphenylethyne **2a** (44.6 mg, 0.25 mmol) were used. Purification via column chromatography on silica gel (petroleum ether/EtOAc = 30/1, v/v) afforded **5j** as a yellow solid (65 mg, 65% yield). M.p.: 192-194 °C. <sup>1</sup>H NMR (400 MHz, CDCl<sub>3</sub>): δ = 8.11 (d, *J* = 8.8 Hz, 1H), 8.06 (d, *J* = 8.0 Hz, 2H), 7.96 (s, 1H), 7.52 (t, *J* = 7.6 Hz, 1H), 7.43-7.36 (m, 4H), 7.33-7.29 (m, 3H), 7.26-7.23 (m, 1H),

6.50 (s, 1H), 2.94-2.91 (m, 2H), 2.75-2.73 (m, 2H), 1.55-1.50 (m, 6H) ppm.  $^{13}\text{C}$  NMR (100 MHz,  $\text{CDCl}_3$ ):  $\delta$  = 197.5, 158.3, 144.1, 137.4, 137.2, 136.7, 133.3, 129.4, 129.3, 128.9, 128.7, 127.9, 126.3, 123.8, 121.6, 54.0, 53.8, 26.3, 24.0 ppm. HRMS (ESI): calcd for  $\text{C}_{25}\text{H}_{24}\text{N}_2\text{NaO}_3$   $[\text{M}+\text{Na}]^+$  423.1685, found 423.1683.

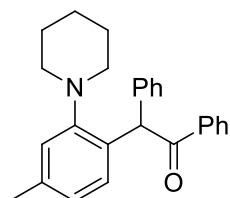

### 2-(4-Methyl-2-(piperidin-1-yl)phenyl)-1,2-diphenylethanone (**5k**)

Following the general procedure. 1-(*m*-Tolyl)piperidine 1-oxide **1w** (95.6 mg, 0.50 mmol) and 1,2-diphenylethyne **2a** (44.6 mg, 0.25 mmol) were used. Purification via column chromatography on silica gel (petroleum ether/EtOAc = 50/1, v/v) afforded **5k** as a white solid (79 mg, 85% yield). M.p.: 112-114 °C.  $^1\text{H}$  NMR (400 MHz,  $\text{CDCl}_3$ ):  $\delta$  = 8.10 (d,  $J$  = 7.6 Hz, 2H), 7.47 (t,  $J$  = 7.2 Hz, 1H), 7.38 (t,  $J$  = 7.6 Hz, 2H), 7.33-7.32 (m, 4H), 7.26-7.25 (m, 1H), 7.02-6.98 (m, 2H), 6.86 (d,  $J$  = 7.6 Hz, 1H), 6.57 (s, 1H), 2.83-2.66 (m, 4H), 2.29 (s, 3H), 1.56-1.51 (m, 6H) ppm.  $^{13}\text{C}$  NMR (100 MHz,  $\text{CDCl}_3$ ):  $\delta$  = 198.7, 152.0, 138.9, 137.9, 137.2, 133.0, 132.7, 129.9, 129.7, 129.0, 128.7, 128.5, 127.0, 125.3, 122.8, 53.3, 26.6, 24.3, 21.4 ppm. HRMS (ESI): calcd for  $\text{C}_{26}\text{H}_{27}\text{NNaO}$   $[\text{M}+\text{Na}]^+$  392.1990, found 392.1986.

## V. Rh(III)-catalyzed annulation of *N*-ethyl-*N*-methylaniline *N*-oxide and *N*-benzyl-*N*-methylaniline *N*-oxide with diphenylacetylene

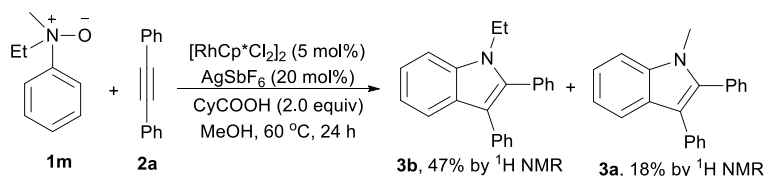

Following the general procedure in **III**. *N*-Ethyl-*N*-methylaniline *N*-oxide **1m** (75.6 mg, 0.50 mmol) and diphenylacetylene **2a** (44.6 mg, 0.25 mmol) were used. The resulting solution was subsequently diluted with 5 mL of dichloromethane, filtered through a celite pad and washed with 10-20 mL of dichloromethane. The combined

organic phases were evaporated, and the resulting residue was analyzed by  $^1\text{H}$  NMR using  $\text{CH}_2\text{Br}_2$  (21  $\mu\text{L}$ , 0.30 mmol) as an internal standard. As a result, *N*-ethyl and *N*-methyl substituted indoles **3b** and **3a** were observed in 47% and 18% yields, respectively.

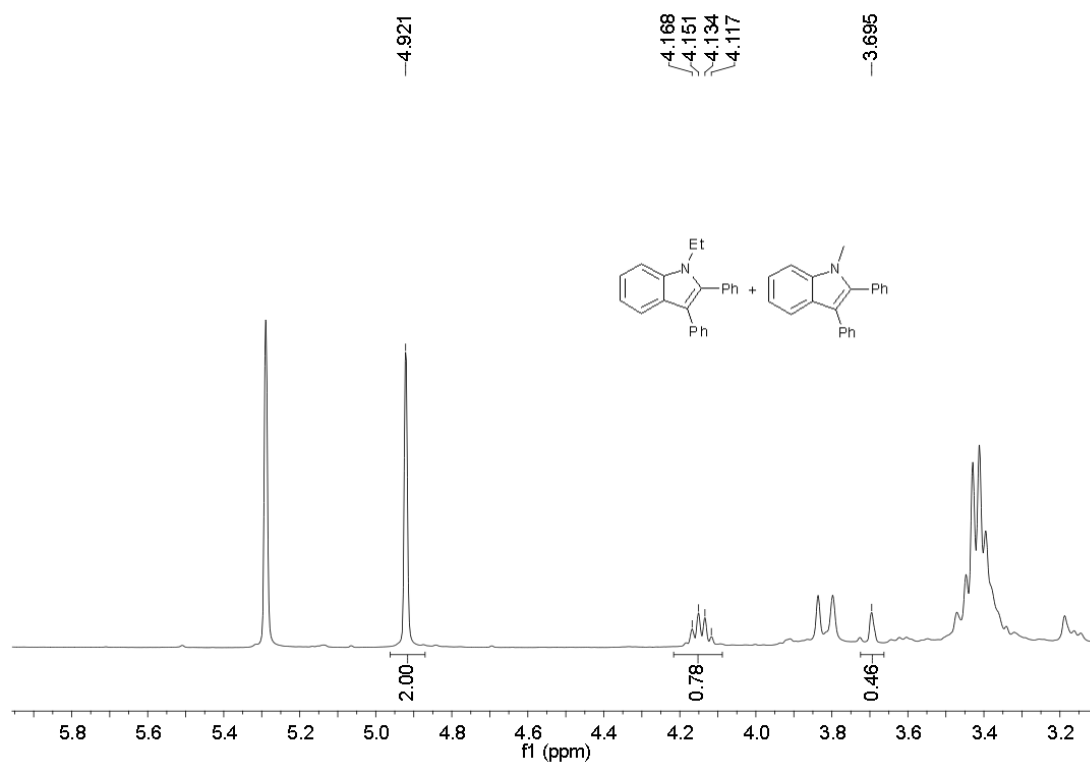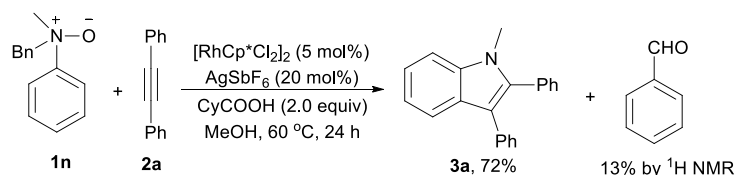

Following the general procedure in **III**, *N*-Benzyl-*N*-methylaniline *N*-oxide **1n** (106.7 mg, 0.50 mmol) and diphenylacetylene **2a** (44.6 mg, 0.25 mmol) were used. The resulting solution was subsequently diluted with 5 mL of dichloromethane, filtered through a celite pad and washed with 10-20 mL of dichloromethane. The combined organic phases were evaporated, and the resulting residue was analyzed by  $^1\text{H}$  NMR using  $\text{CH}_2\text{Br}_2$  (14  $\mu\text{L}$ , 0.20 mmol) as an internal standard. As a result, benzaldehyde was observed in 13% yield. Then, the residue was purified by column chromatography on silica gel (petroleum ether/EtOAc = 100/1, v/v) to afford the product **3a** in 72% yield.

## VI. Mechanism study

### 1. The investigation of transformation of **3a'** to **3a**.

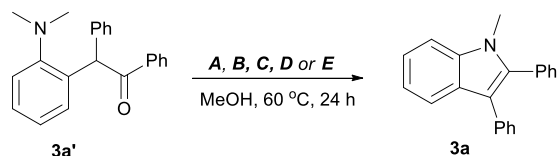

**A:** [RhCp\*Cl<sub>2</sub>]<sub>2</sub> (5 mol%), 0% yield

**B:** CyCOOH (2.0 equiv), 0% yield

**C:** AgSbF<sub>6</sub> (20 mol%), 14% yield

**D:** [RhCp\*Cl<sub>2</sub>]<sub>2</sub> (5 mol%) and CyCOOH (2.0 equiv), 0% yield

**E:** [RhCp\*Cl<sub>2</sub>]<sub>2</sub> (5 mol%), AgSbF<sub>6</sub> (20 mol%) and CyCOOH (2.0 equiv), 10% yield

**A)** A Schlenk tube with a magnetic stir bar was charged with **3a'** (25 mg, 0.08 mmol), [RhCp\*Cl<sub>2</sub>]<sub>2</sub> (2.5 mg, 0.004 mmol), and MeOH (0.5 mL) under an N<sub>2</sub> atmosphere. The resulting mixture was stirred at 60 °C for 24 h. TLC showed that no **3a** was produced.

**B)** A Schlenk tube with a magnetic stir bar was charged with **3a'** (25 mg, 0.08 mmol), CyCOOH (20.5 mg, 0.16 mmol), and MeOH (0.5 mL) under an N<sub>2</sub> atmosphere. The resulting mixture was stirred at 60 °C for 24 h. TLC showed that no **3a** was produced.

**C)** A Schlenk tube with a magnetic stir bar was charged with **3a'** (50 mg, 0.16 mmol), AgSbF<sub>6</sub> (11 mg, 0.032 mmol), and MeOH (1.0 mL) under an N<sub>2</sub> atmosphere. The resulting mixture was stirred at 60 °C for 24 h. After being cooled to ambient temperature, the resulting solution was concentrated under reduced pressure. The resulting residue was purified by column chromatography on silica gel (petroleum ether/EtOAc = 100/1, v/v) to provide **3a** (6.3 mg, 14% yield).

**D)** A Schlenk tube with a magnetic stir bar was charged with **3a'** (25 mg, 0.08 mmol), [RhCp\*Cl<sub>2</sub>]<sub>2</sub> (2.5 mg, 0.004 mmol), CyCOOH (20.5 mg, 0.16 mmol), and MeOH (0.5 mL) under an N<sub>2</sub> atmosphere. The resulting mixture was stirred at 60 °C for 24 h. TLC showed that no **3a** was produced.

**E)** A Schlenk tube with a magnetic stir bar was charged with **3a'** (50 mg, 0.16 mmol), [RhCp\*Cl<sub>2</sub>]<sub>2</sub> (5.0 mg, 0.008 mmol), CyCOOH (41 mg, 0.32 mmol), AgSbF<sub>6</sub> (11 mg, 0.032 mmol), and MeOH (1.0 mL) under an N<sub>2</sub> atmosphere. The resulting mixture was stirred at 60 °C for 24 h. After being cooled to ambient temperature, the resulting



solution was concentrated under reduced pressure. The resulting residue was purified by column chromatography on silica gel (petroleum ether/EtOAc = 100/1, v/v) to provide **3a** (4.5 mg, 10% yield).

## 2. Hydrogen-deuterium exchange experiment

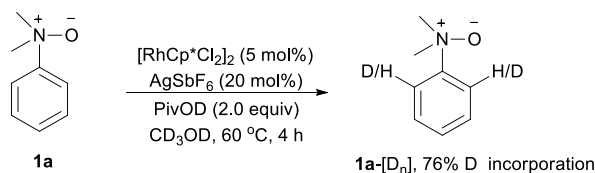

A sealable tube with a magnetic stir bar was charged with  $[\text{RhCp}^*\text{Cl}_2]_2$  (7.8 mg, 12.5  $\mu\text{mol}$ , 5 mol%),  $\text{AgSbF}_6$  (17.2 mg, 50  $\mu\text{mol}$ , 20 mol%), PivOD (51.5 mg, 0.5 mmol, 2.0 equiv), **1a** (34.3 mg, 0.25 mmol), and  $\text{CD}_3\text{OD}$  (1.0 mL) under an  $\text{N}_2$  atmosphere. The reaction mixture was stirred at 60  $^\circ\text{C}$  for 4 h. After being cooled to ambient temperature, the resulting solution was diluted with 5 mL of dichloromethane, filtered through a celite pad and washed with 10-20 mL of dichloromethane. The combined organic phases were evaporated, and the resulting residue was purified by column chromatography on silica gel to provide the desired product **1a-[D<sub>n</sub>]**.  $^1\text{H}$  NMR analysis showed that 76% hydrogen at the *ortho* position of phenyl ring of *N,N*-dimethylaniline *N*-oxide was deuterated

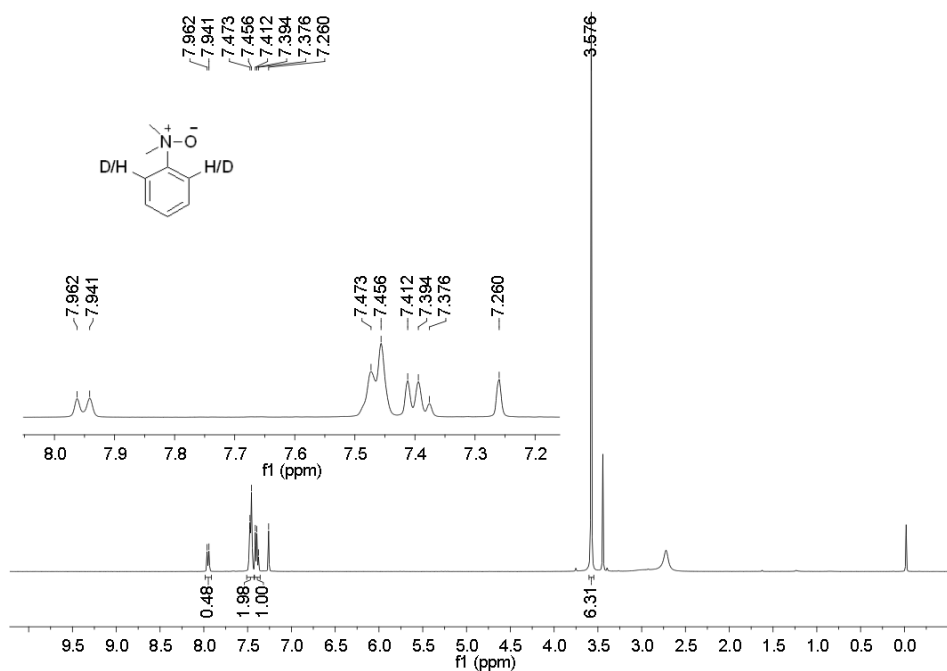

## 3. Kinetic isotope effect

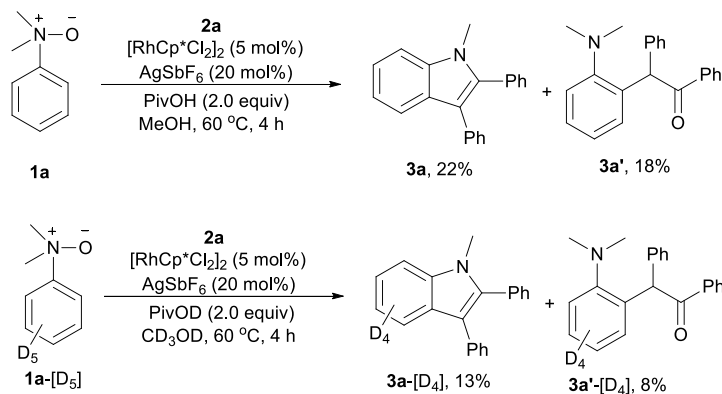

A sealable tube with a magnetic stir bar was charged with  $[\text{RhCp}^*\text{Cl}_2]_2$  (7.8 mg, 12.5  $\mu\text{mol}$ , 5 mol%),  $\text{AgSbF}_6$  (17.2 mg, 50  $\mu\text{mol}$ , 20 mol%), PivOH or PivOD (0.5 mmol, 2.0 equiv), **1a** or **1a-[D<sub>5</sub>]** (0.50 mmol, 2.0 equiv), **2a** (44.6 mg, 0.25 mmol) and MeOH or CD<sub>3</sub>OD (1.0 mL) under an N<sub>2</sub> atmosphere. The reaction mixture was stirred at 60 °C for 4 h. After being cooled to ambient temperature, the resulting solution was diluted with 5 mL of dichloromethane, filtered through a celite pad and washed with 10-20 mL of dichloromethane. The combined organic phases were evaporated, and the resulting residue was purified by column chromatography on silica gel to provide **3a/3a'** or **3a-[D<sub>4</sub>]/3a'-[D<sub>4</sub>]**. A KIE value of 1.9 [(22% + 18%)/(13% + 8%)] was observed.

#### 4. The synthesis and reaction of cyclometalated Rh(III) complex **6**

##### 1). Synthesis of cyclometalated Rh(III) complex **6**<sup>4</sup>

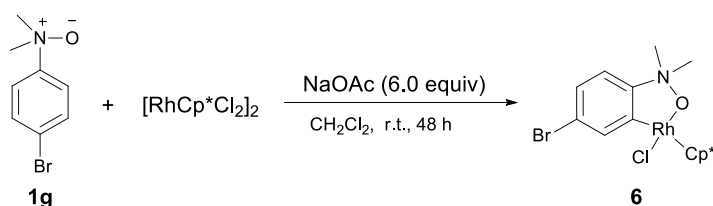

A Schlenk tube with a magnetic stir bar was charged with  $[\text{RhCp}^*\text{Cl}_2]_2$  (100 mg, 0.162 mmol), NaOAc (80 mg, 0.972 mmol), 4-bromo-N,N-dimethylaniline N-oxide **1g** (87.5 mg, 0.405 mmol), and CH<sub>2</sub>Cl<sub>2</sub> (1.0 mL) under an N<sub>2</sub> atmosphere. The resulting mixture was stirred at room temperature for 48 h and then diluted with 3 mL of dichloromethane. The solution was filtered through a celite pad and washed with 10-20 mL of dichloromethane. The filtrate was concentrated and the residue was purified by column chromatography on alumina (CH<sub>2</sub>Cl<sub>2</sub>/acetone = 3/1, v/v) to

provide the complex **6** as a red orange solid (128 mg, 81% yield).  $^1\text{H}$  NMR (400 MHz,  $\text{CDCl}_3$ ):  $\delta$  = 1.62 (s, 15H), 3.28 (s, 3H), 3.45 (s, 3H), 6.59 (d,  $J$  = 8.4 Hz, 1H), 7.06 (d,  $J$  = 8.4 Hz, 1H), 7.82 (s, 1H) ppm.

## 2). Complex **6**-catalyzed annulation of aniline *N*-oxide **1g**

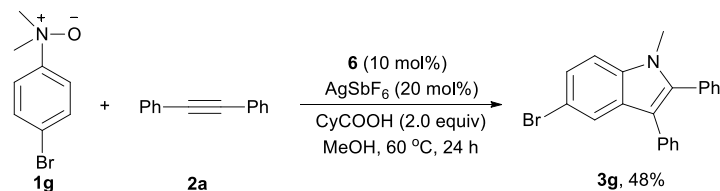

A Schlenk tube with a magnetic stir bar was charged with complex **6** (12.2 mg, 25  $\mu\text{mol}$ ),  $\text{AgSbF}_6$  (17.2 mg, 50  $\mu\text{mol}$ ),  $\text{CyCOOH}$  (64 mg, 0.50 mmol), **1g** (108 mg, 0.50 mmol), **2a** (44.6 mg, 0.25 mmol), and  $\text{MeOH}$  (1.0 mL) under an  $\text{N}_2$  atmosphere. The reaction mixture was stirred at  $60\text{ }^\circ\text{C}$  for 24 h. After being cooled to ambient temperature, the resulting solution was diluted with 5 mL of dichloromethane, filtered through a celite pad and washed with 10-20 mL of dichloromethane. The combined organic phases were evaporated, and the resulting residue was purified by column chromatography on silica gel to provide 43 mg of **3g** in 48% yield.

## 5. $\text{O}^{18}$ labeling experiment

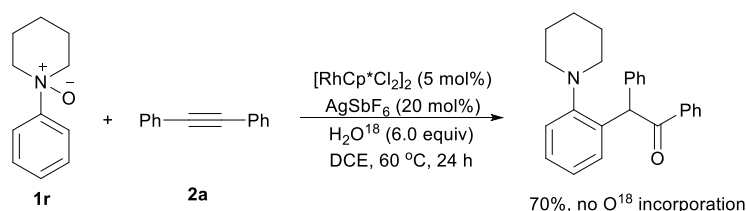

A Schlenk tube with a magnetic stir bar was charged with  $[\text{RhCp}^*\text{Cl}_2]_2$  (7.8 mg, 12.5  $\mu\text{mol}$ , 5 mol%),  $\text{AgSbF}_6$  (17.2 mg, 50  $\mu\text{mol}$ , 20 mol%),  $\text{H}_2\text{O}^{18}$  (27  $\mu\text{L}$ , 1.5 mmol, 6.0 equiv), **1r** (88.6 mg, 0.50 mmol, 2.0 equiv), **2a** (44.6 mg, 0.25 mmol) and  $\text{DCE}$  (1.0 mL) under an  $\text{N}_2$  atmosphere. The reaction mixture was stirred at  $60\text{ }^\circ\text{C}$  for 24 h. After being cooled to ambient temperature, the resulting solution was diluted with 5 mL of dichloromethane, filtered through a celite pad and washed with 10-20 mL of dichloromethane. The combined organic phases were evaporated, and the resulting residue was purified by column chromatography on silica. GC-MS and HRMS

analysis showed no O<sup>18</sup> incorporation in the isolated product.

## VII. References

- 1 J. W. Kang, K. Moseley and P. M. Maitlis, *J. Am. Chem. Soc.*, 1969, **91**, 5970.
- 2 (a) K. Kinashi, K.-P. Lee, S. Matsumoto, K. Ishida and Y. Ueda, *Dyes Pigm.*, 2011, **92**, 783; (b) A. G. Giumanini, G. Chiavari, M. M. Musiani and P. Rossi, *Synthesis*, 1980, 743; (c) L. Zhang, C. Peng, D. Zhao, Y. Wang, H.-J. Fu, Q. Shen and J.-X. Li, *Chem. Commun.*, 2012, **48**, 5928; (d) X.-F. Xia, X.-Z. Shu, K.-G. Ji, A. Shaukat, X.-Y. Liu and Y.-M. Liang, *J. Org. Chem.*, 2011, **76**, 342; (e) T. Kubo, C. Katoh, K. Yamada, K. Okano, H. Tokuyama and T. Fukuyama, *Tetrahedron*, 2008, **64**, 11230.
- 3 J. C. Craig and K. K. Purushothaman, *J. Org. Chem.*, 1970, **35**, 1721.
- 4 X. Huang, J. Huang, C. Du, X. Zhang, F. Song and J. You, *Angew. Chem. Int. Ed.*, 2013, **52**, 12970.
- 5 C. Wang and Y. Huang, *Org. Lett.*, 2013, **15**, 5294.
- 6 Y. Liang and N. Jiao, *Angew. Chem. Int. Ed.*, 2016, DOI: 10.1002/anie.201511002.
- 7 M. Takanori and T. YuKi, *Tetrahedron Lett.*, 2014, **55**, 3302.

# VIII. Copies of $^1\text{H}$ and $^{13}\text{C}$ NMR spectra

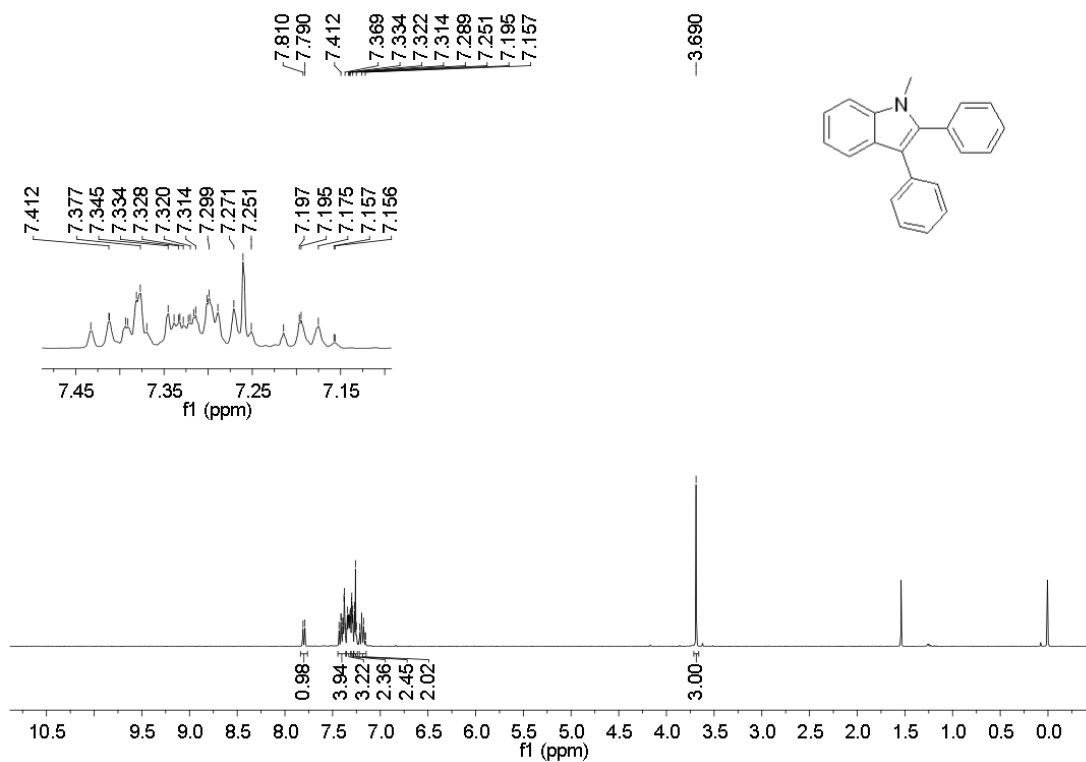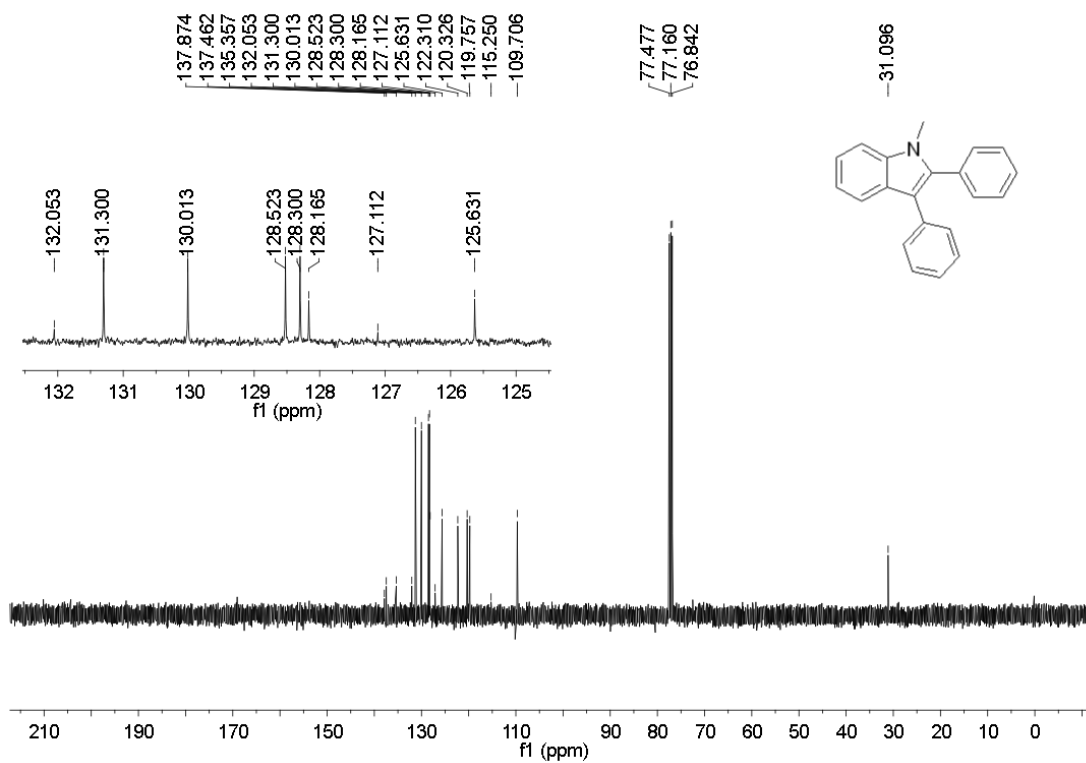

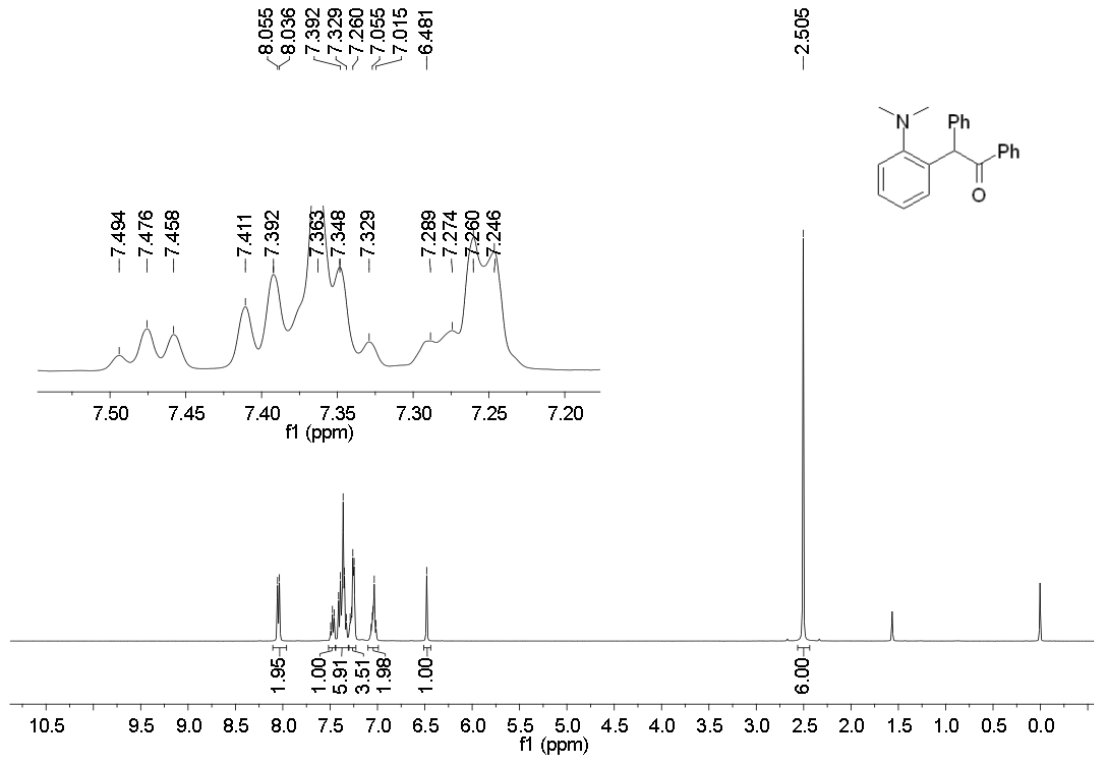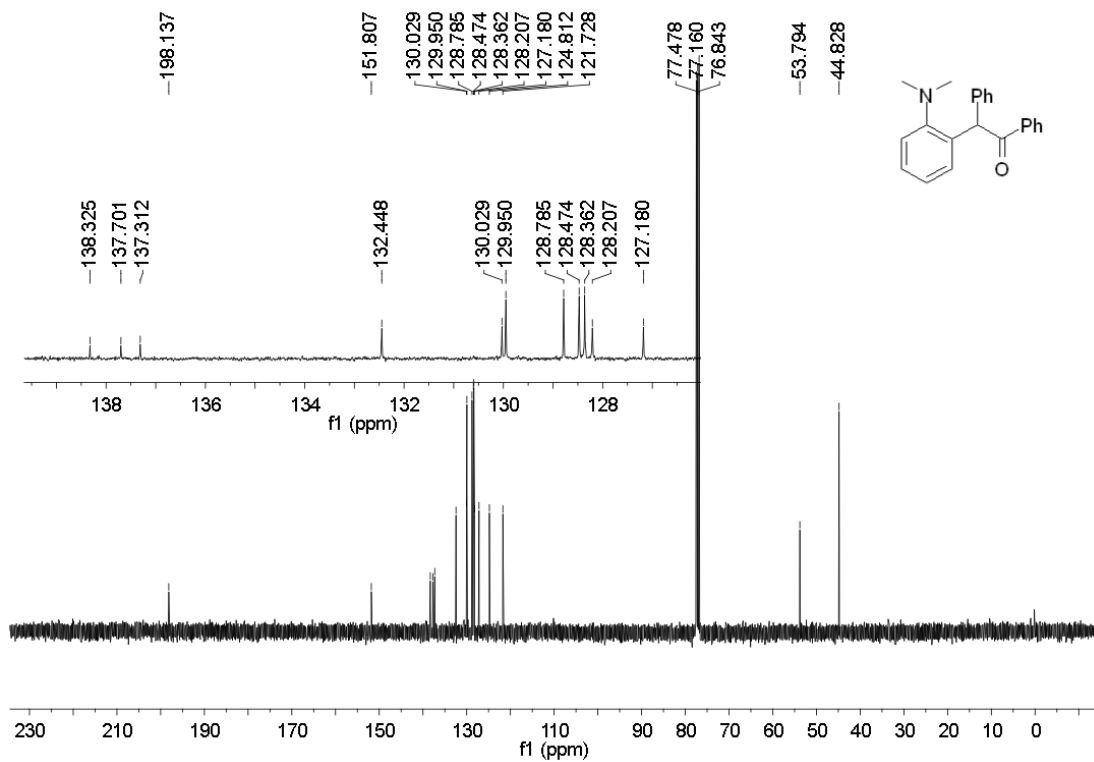

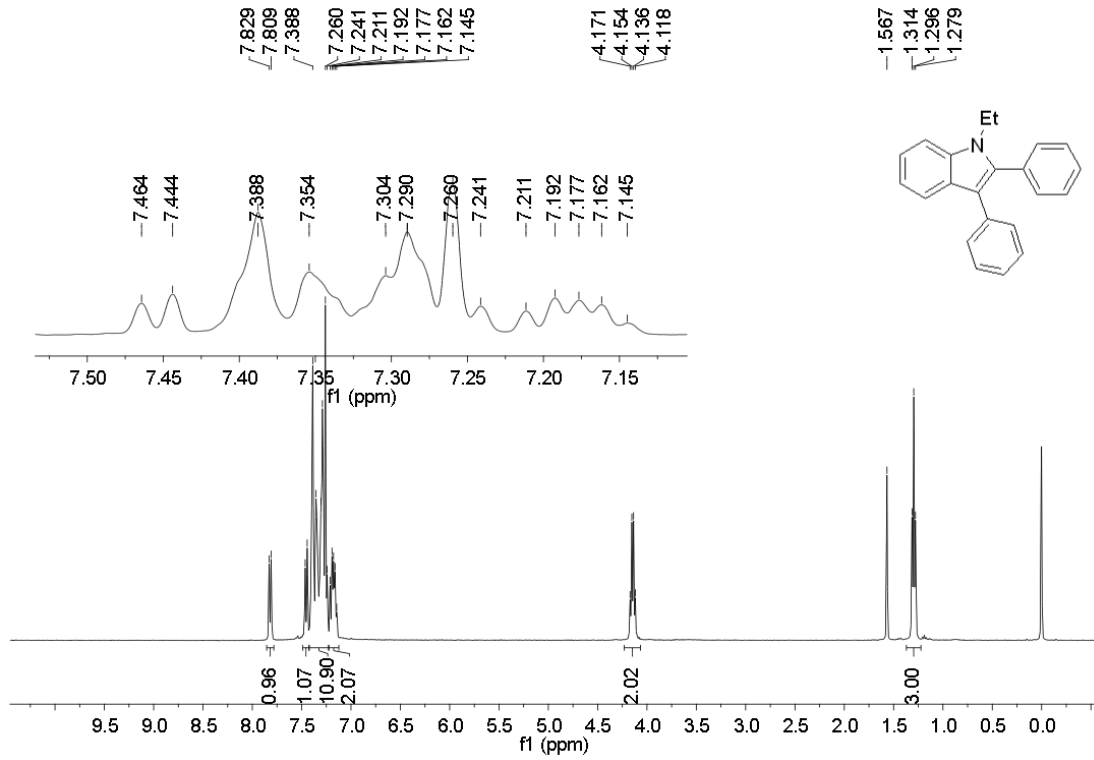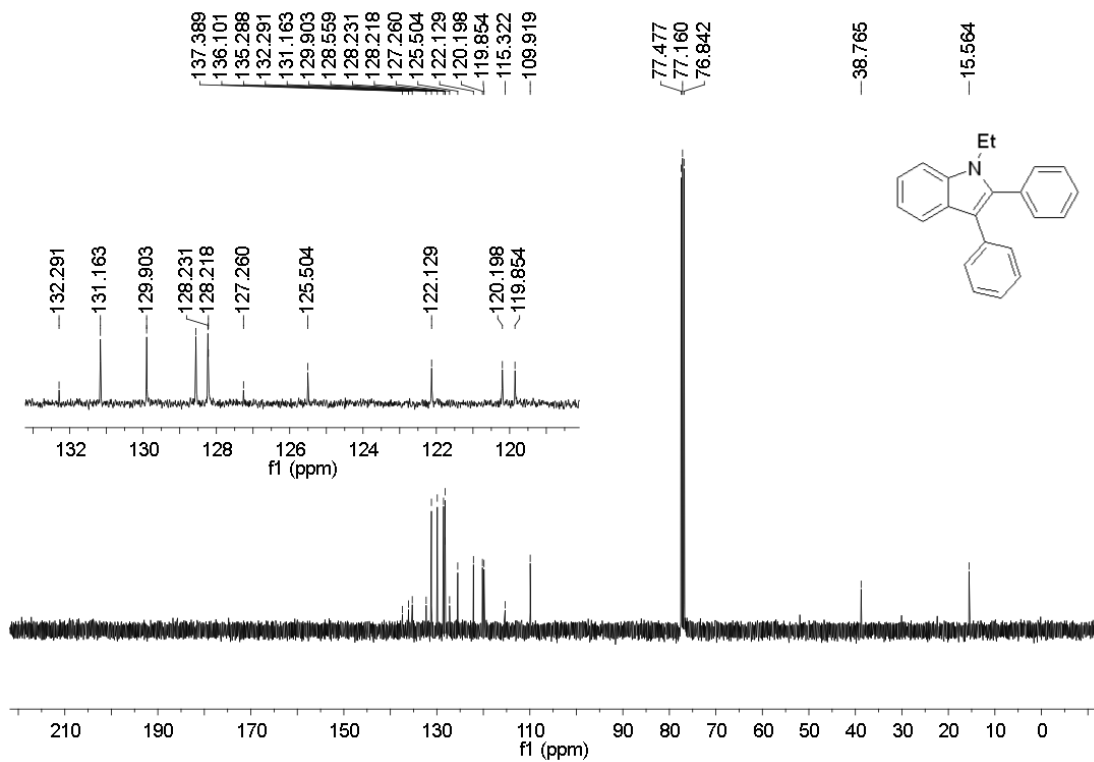

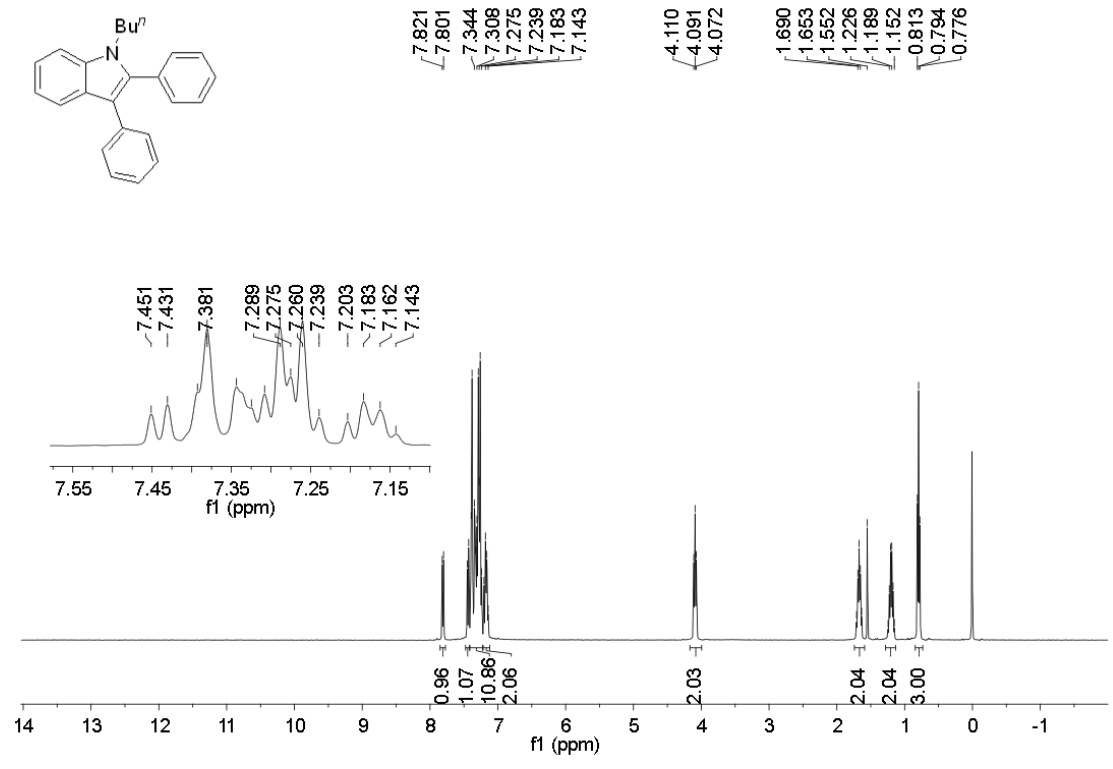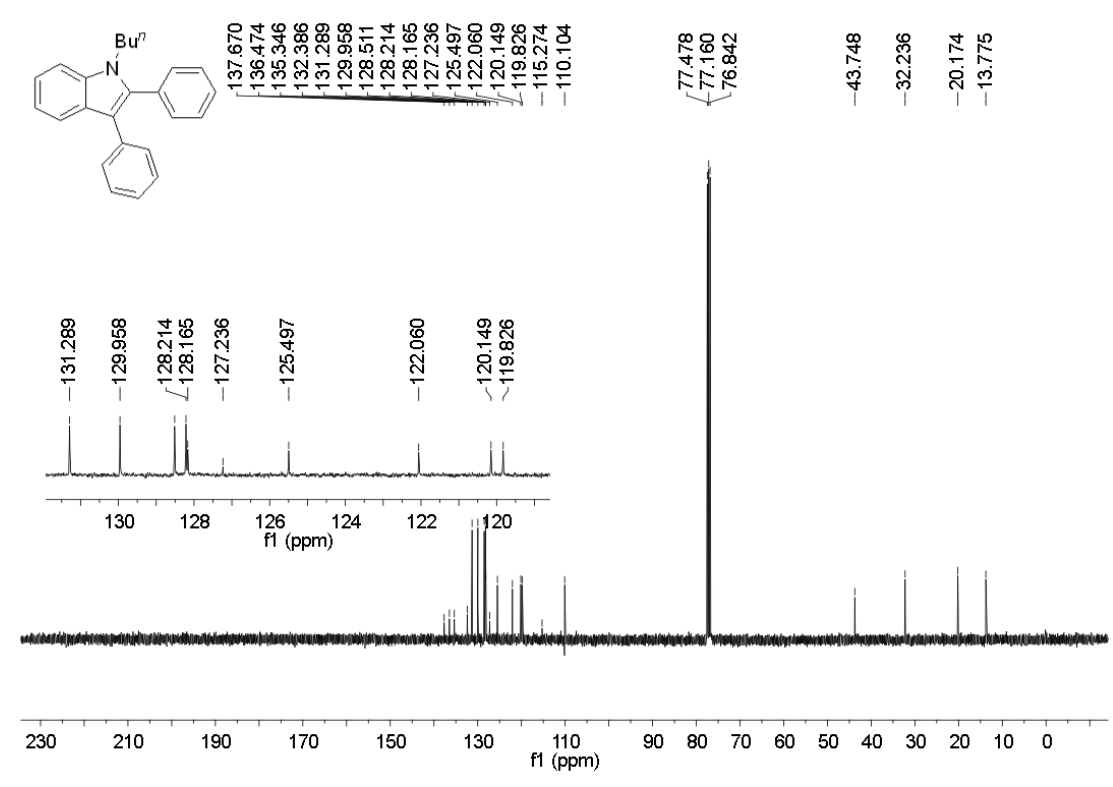



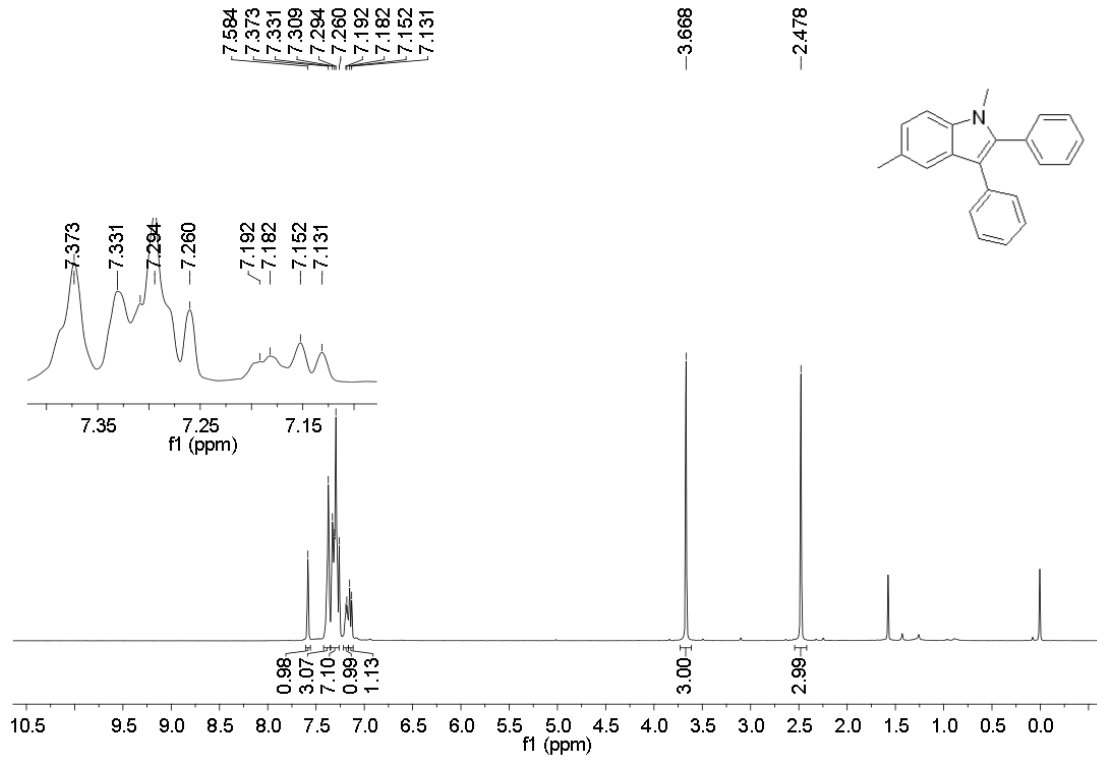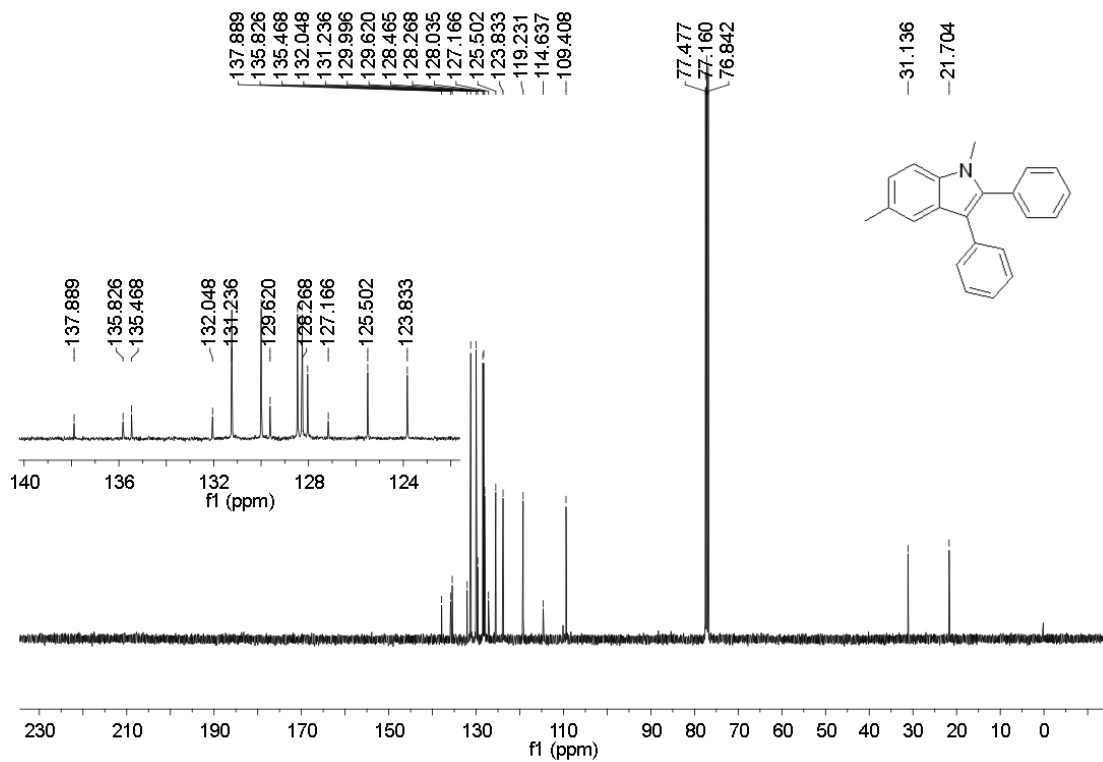

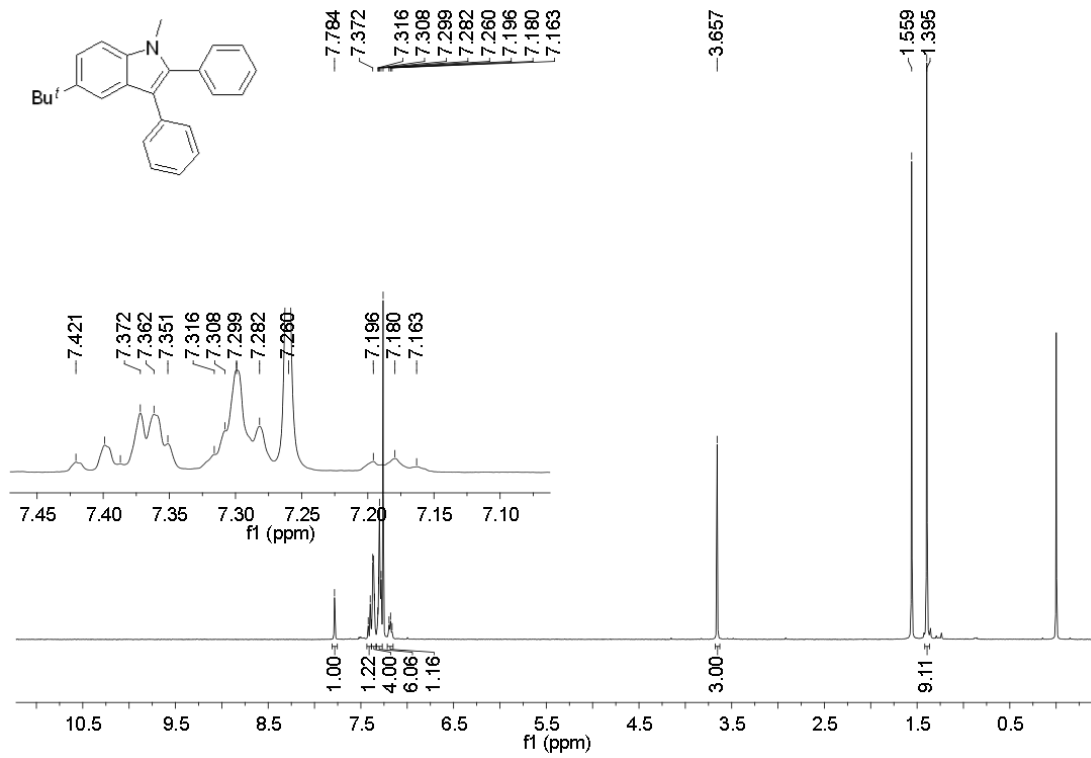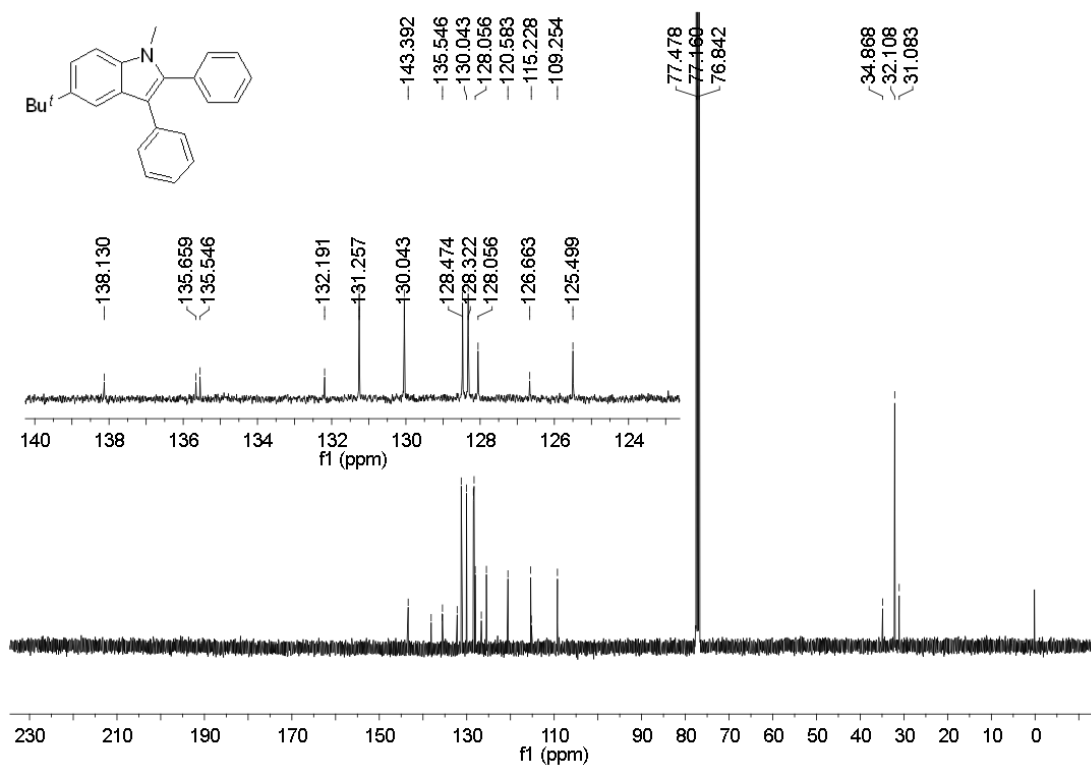

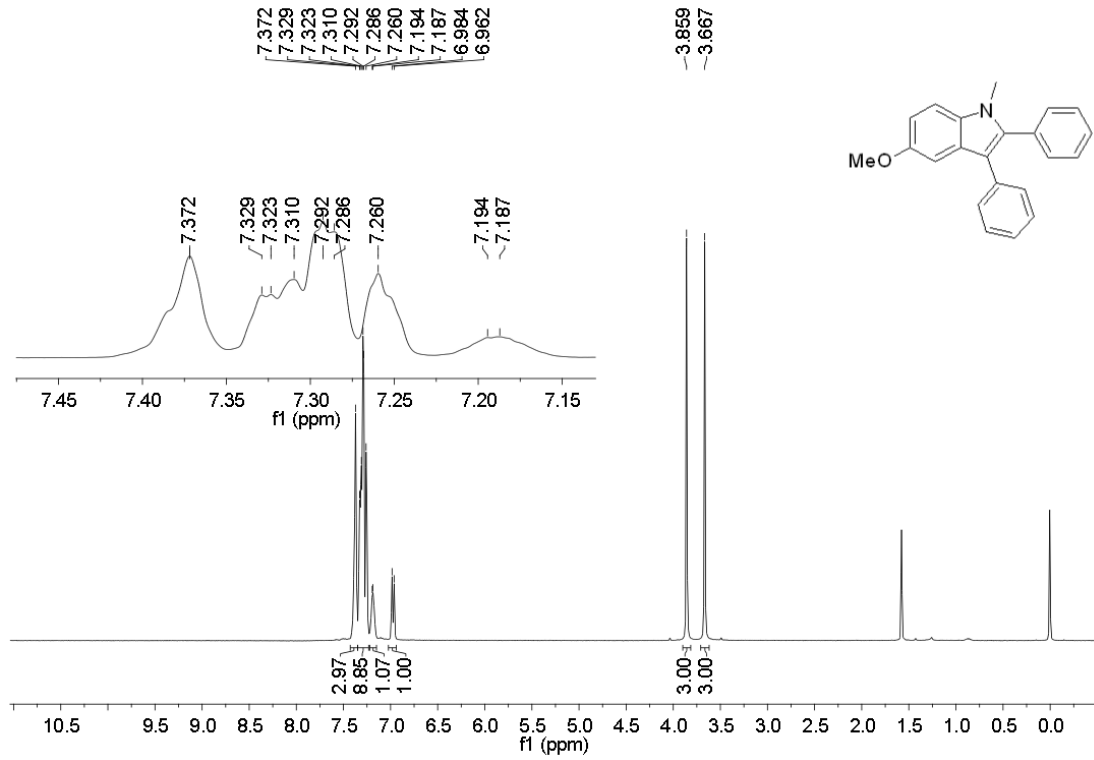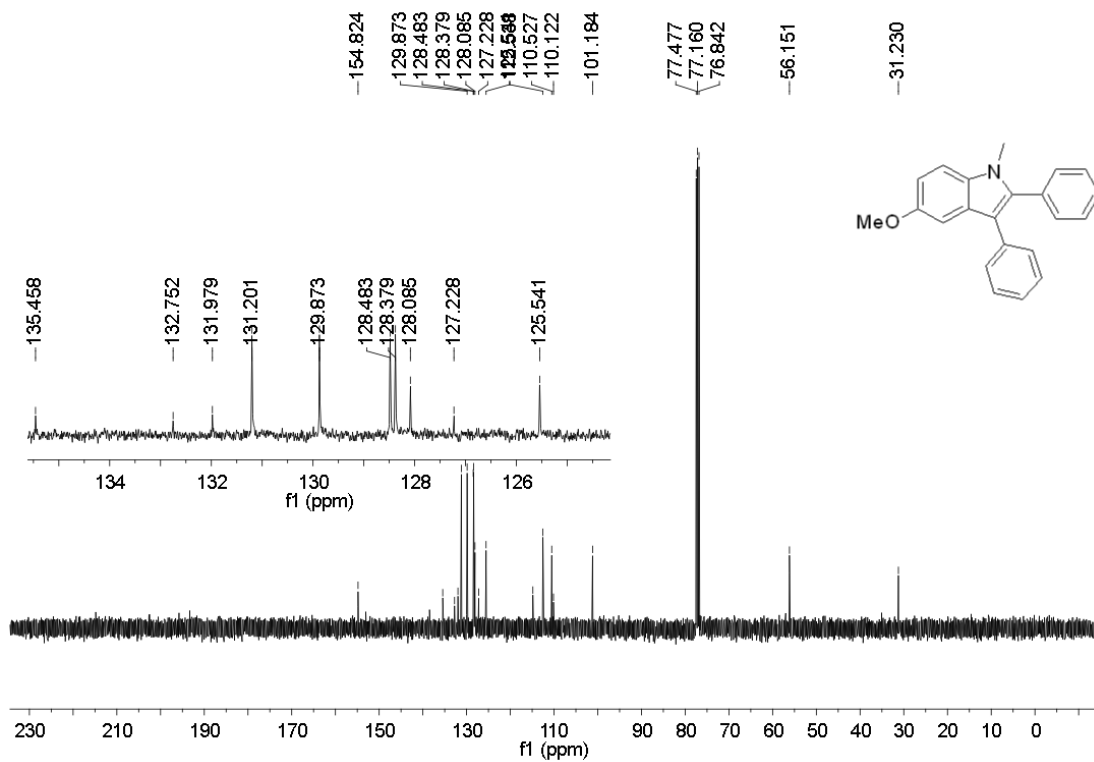

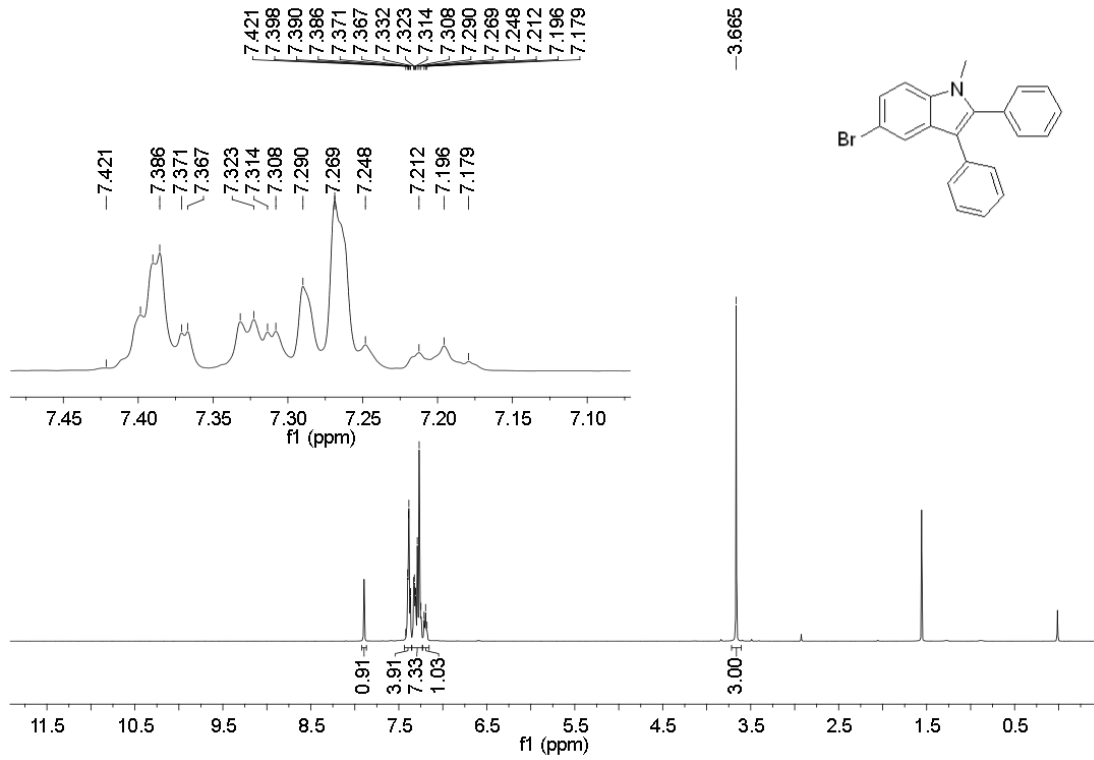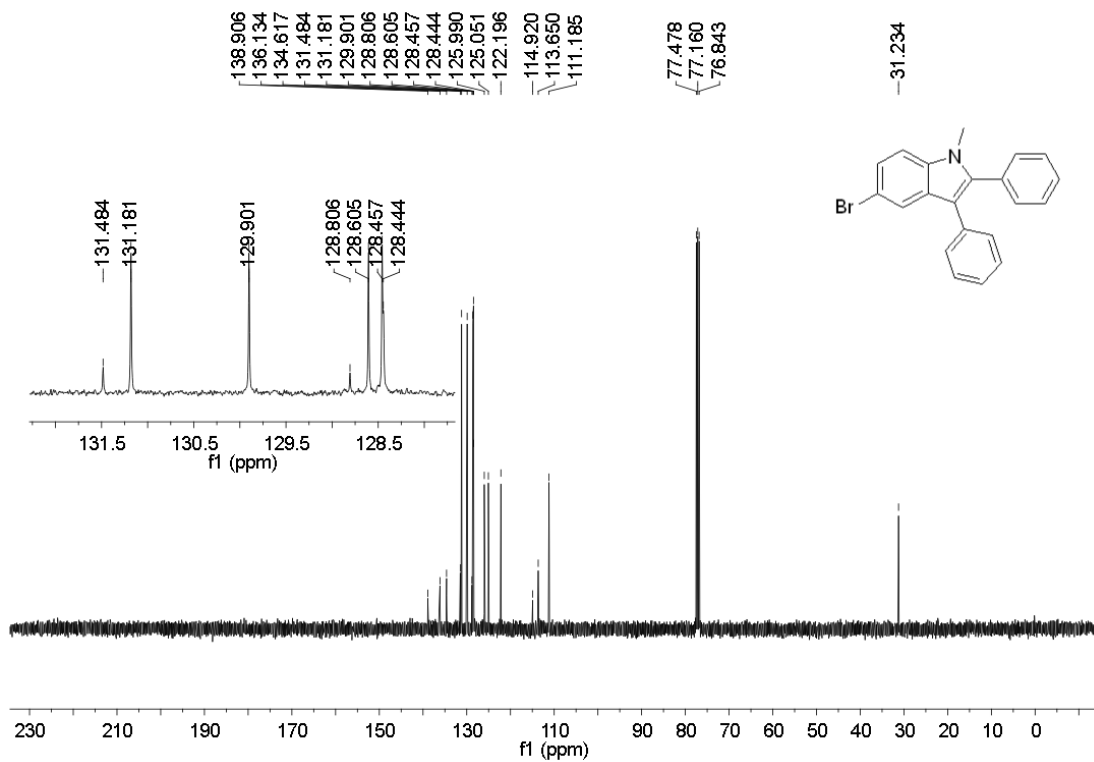

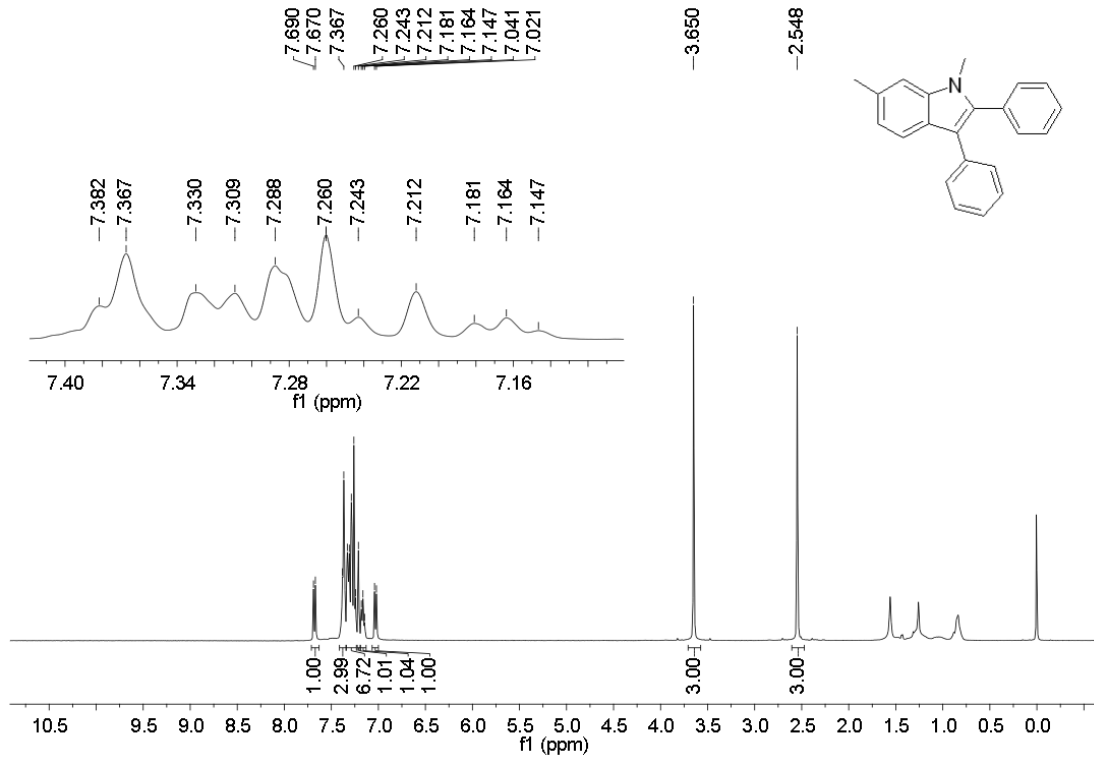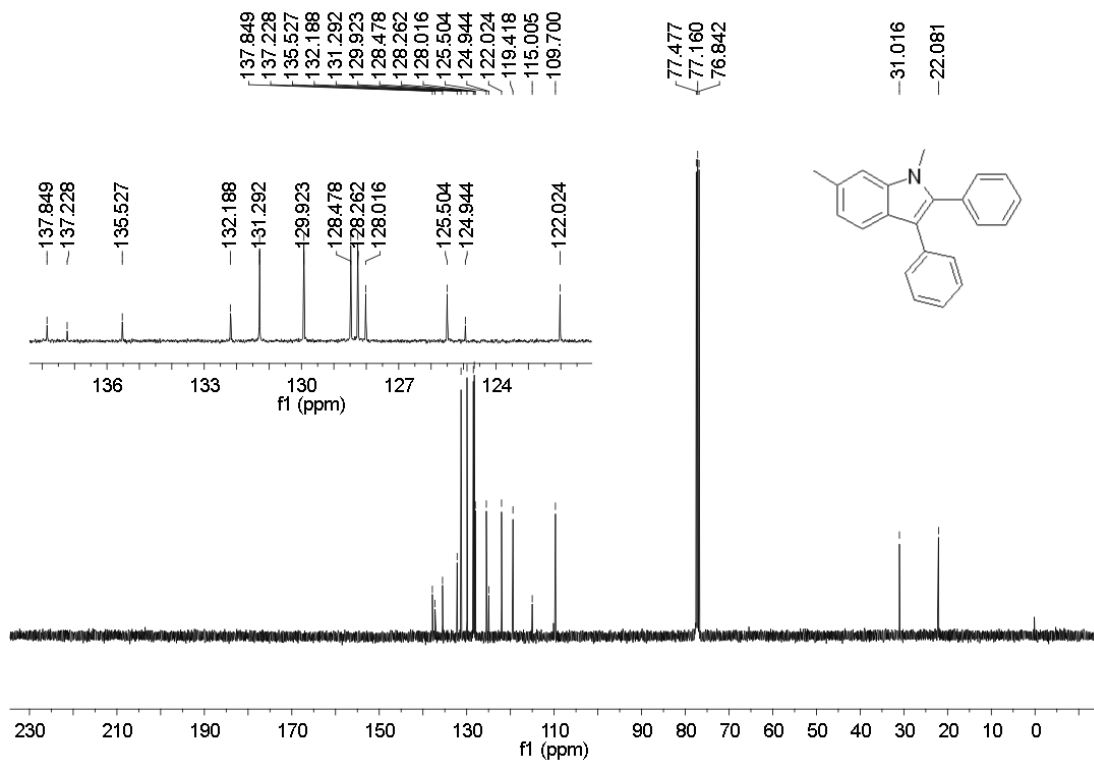

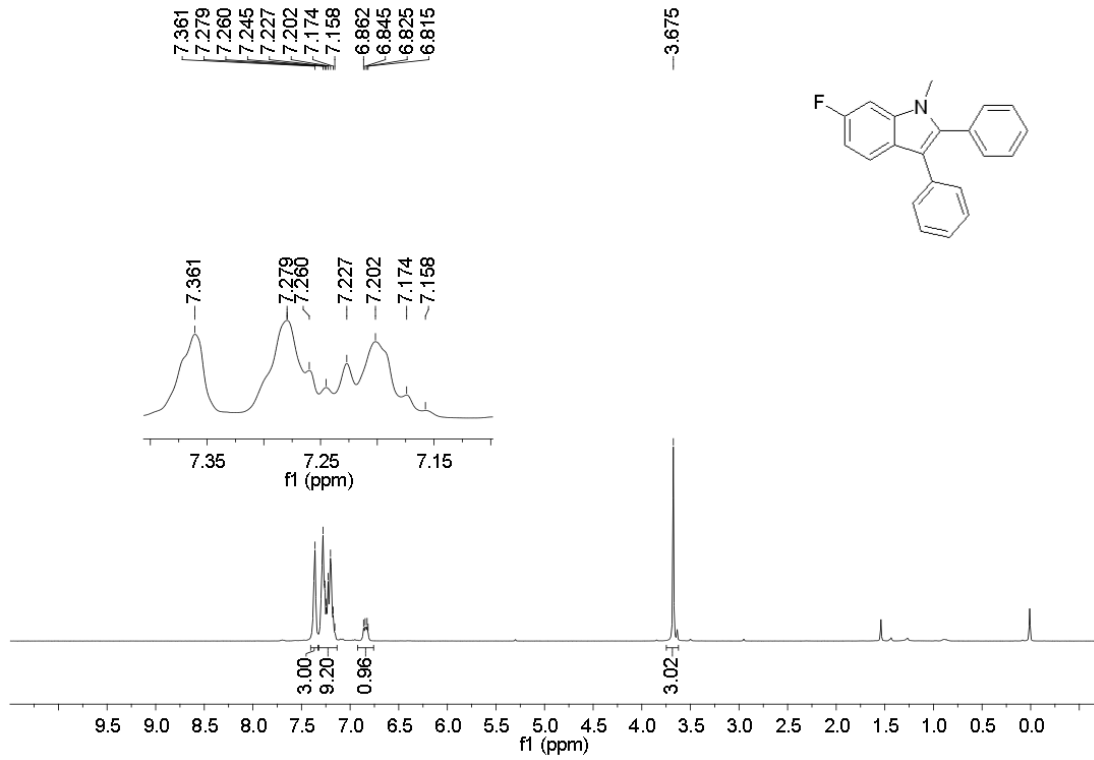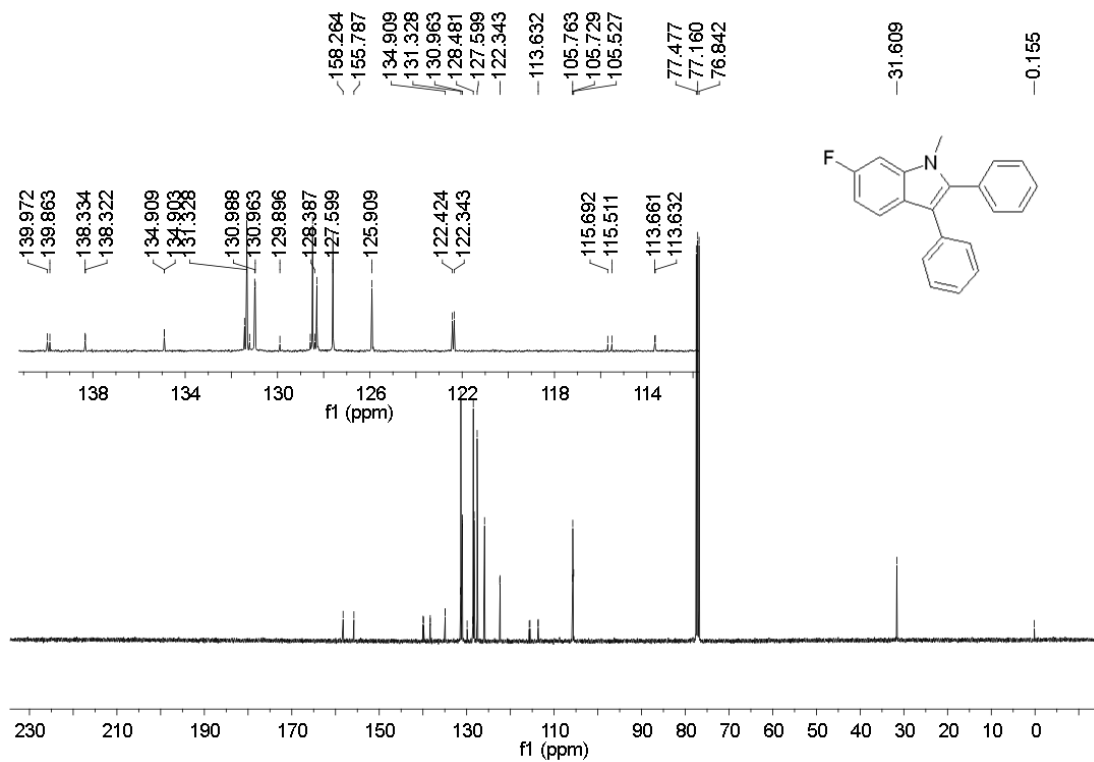

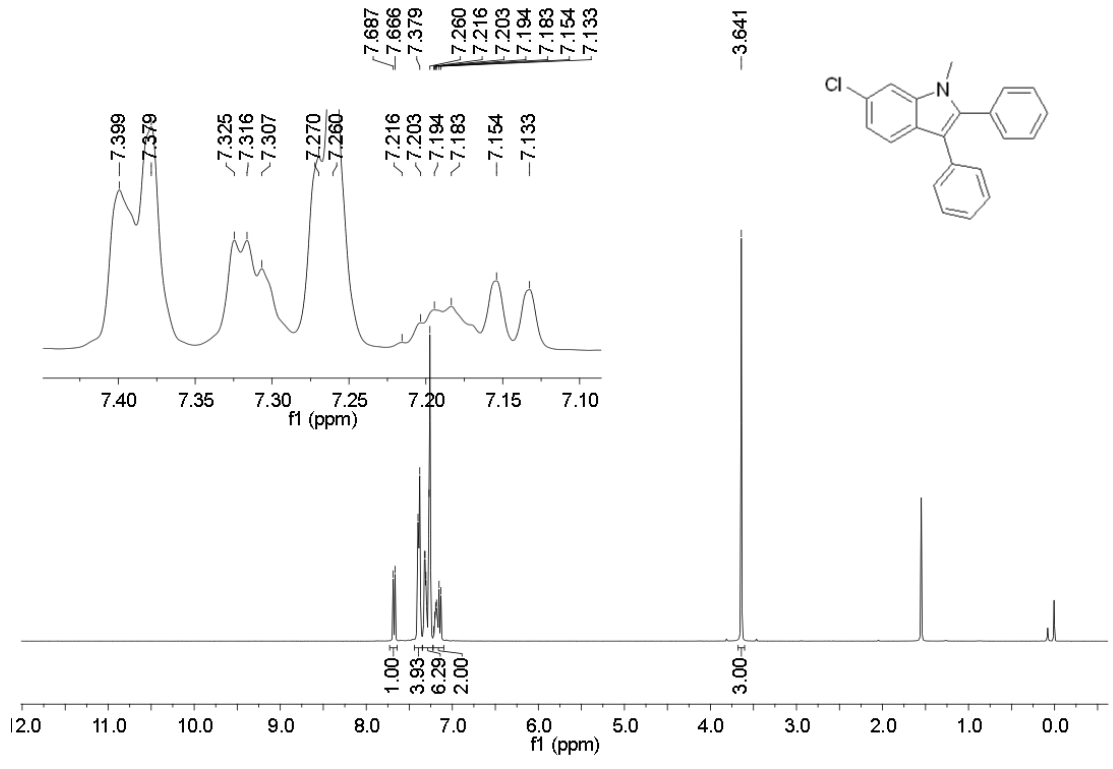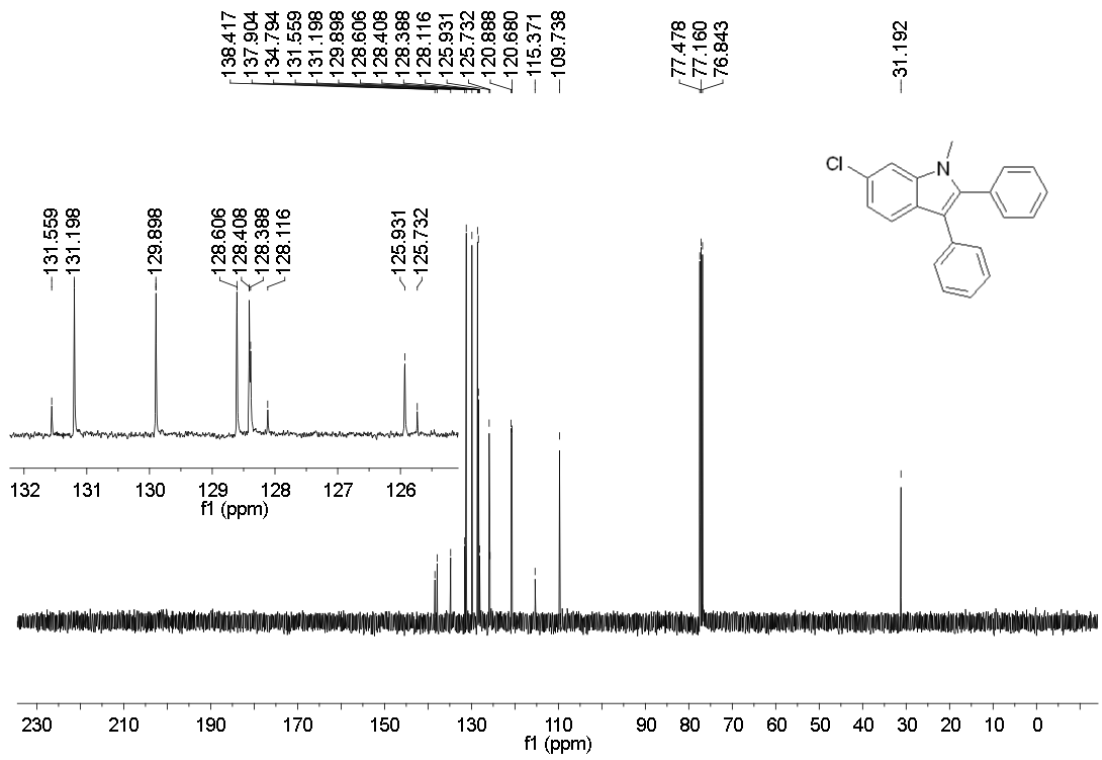

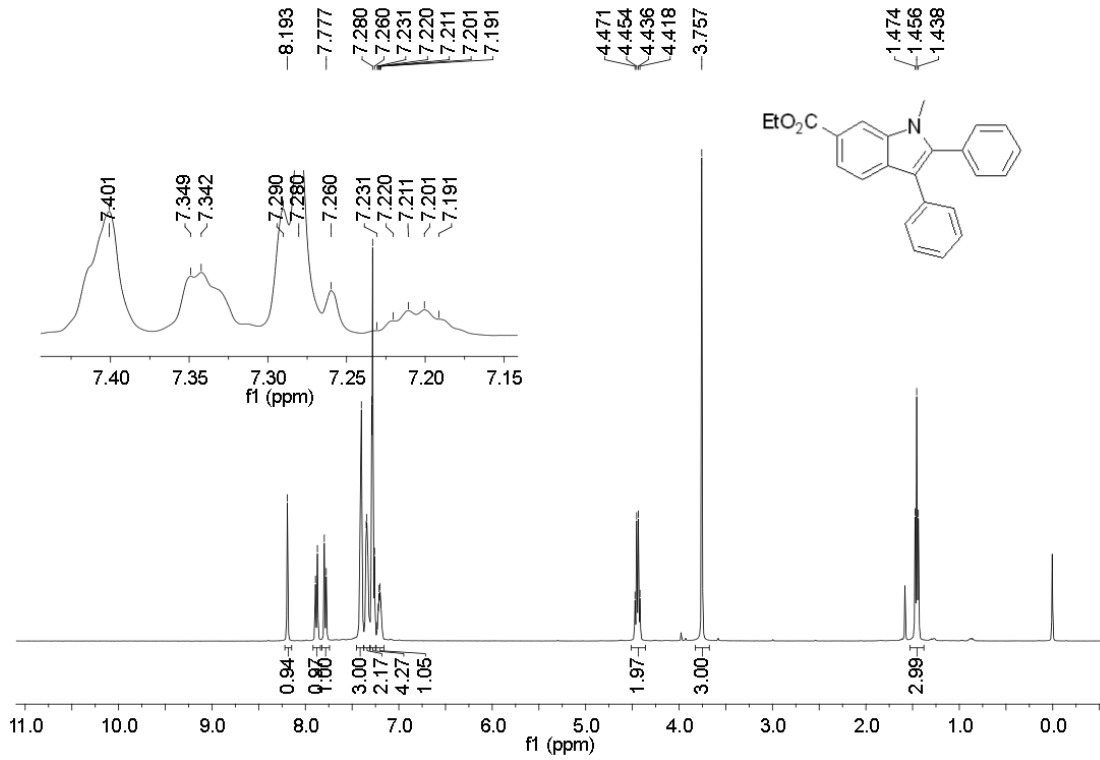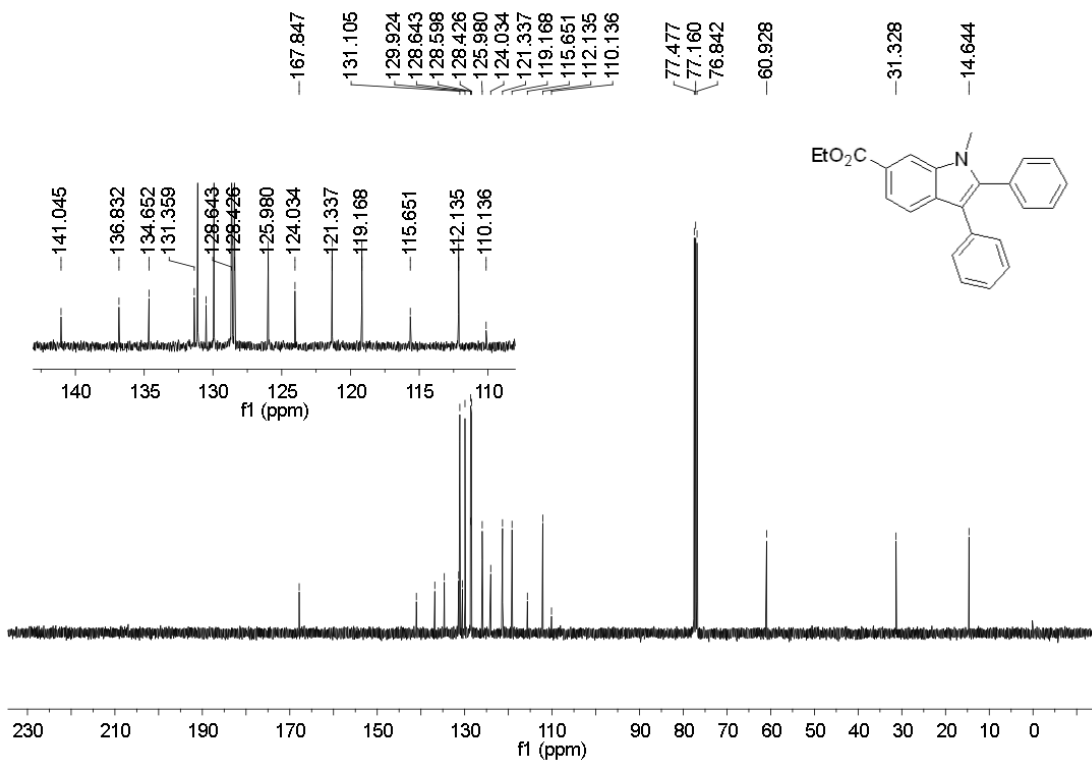



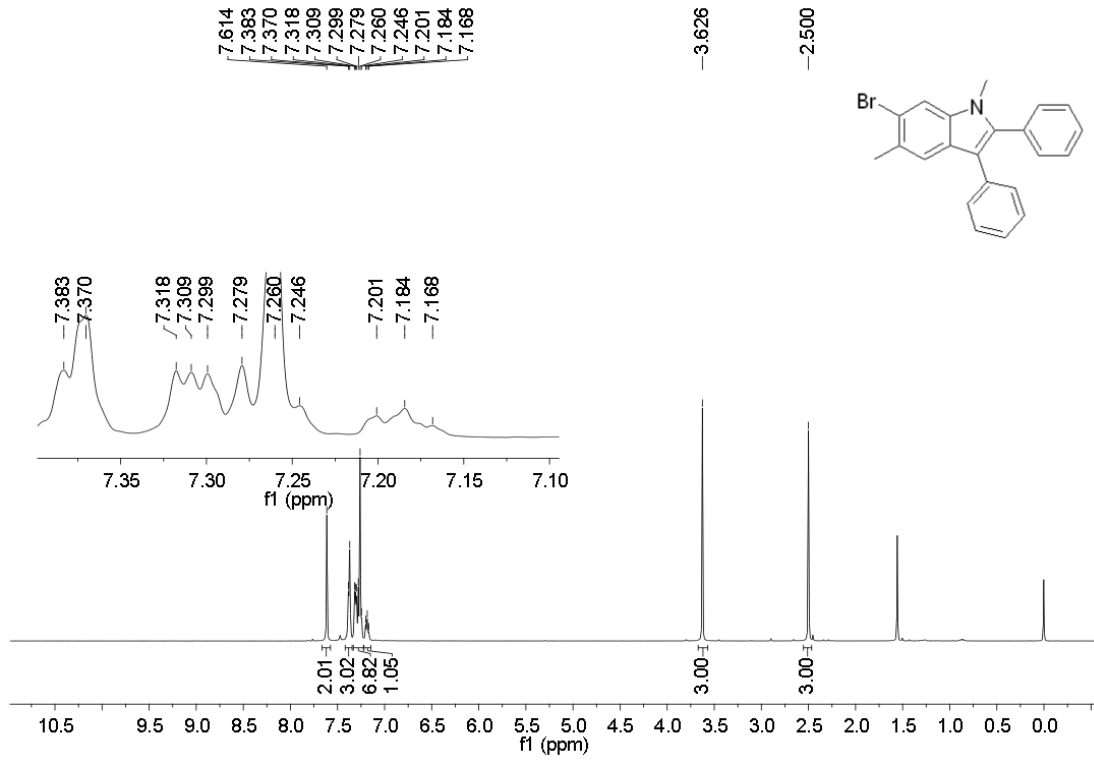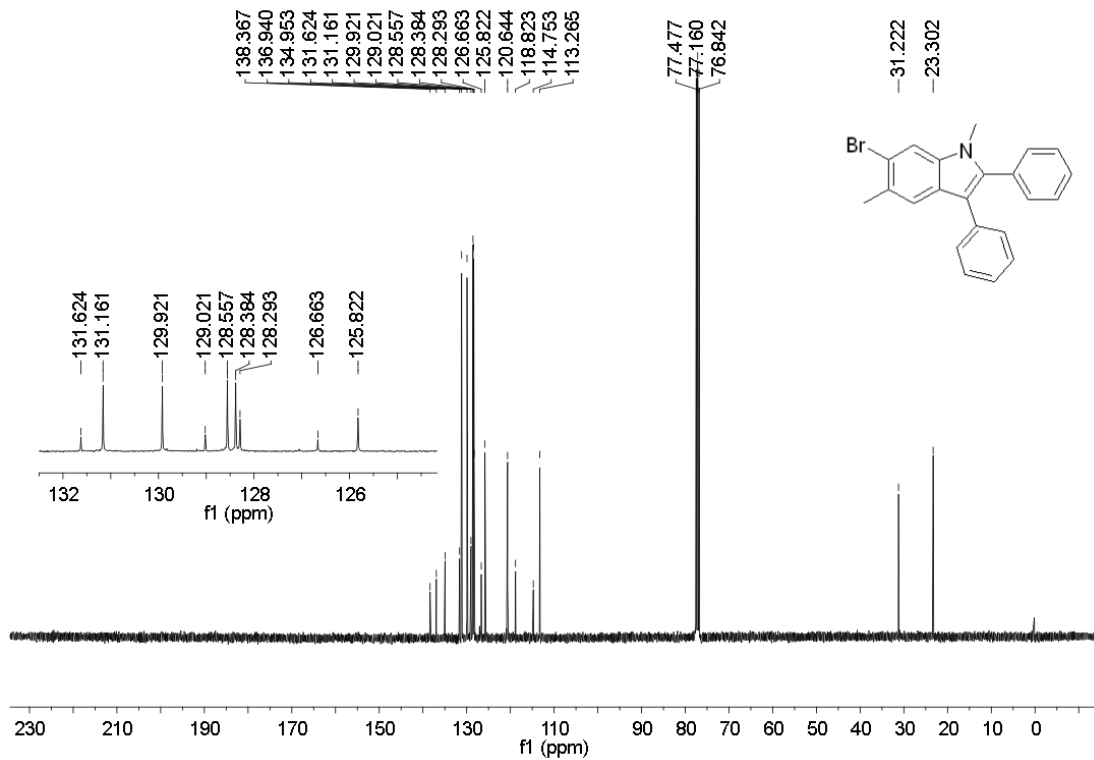

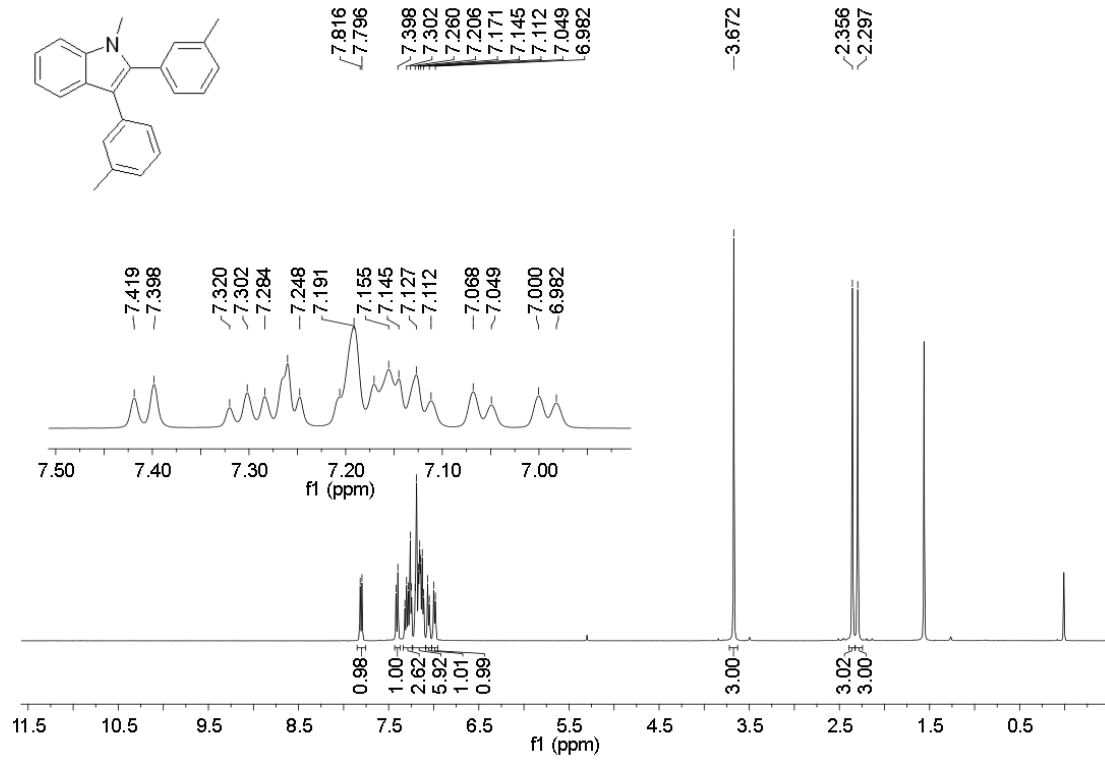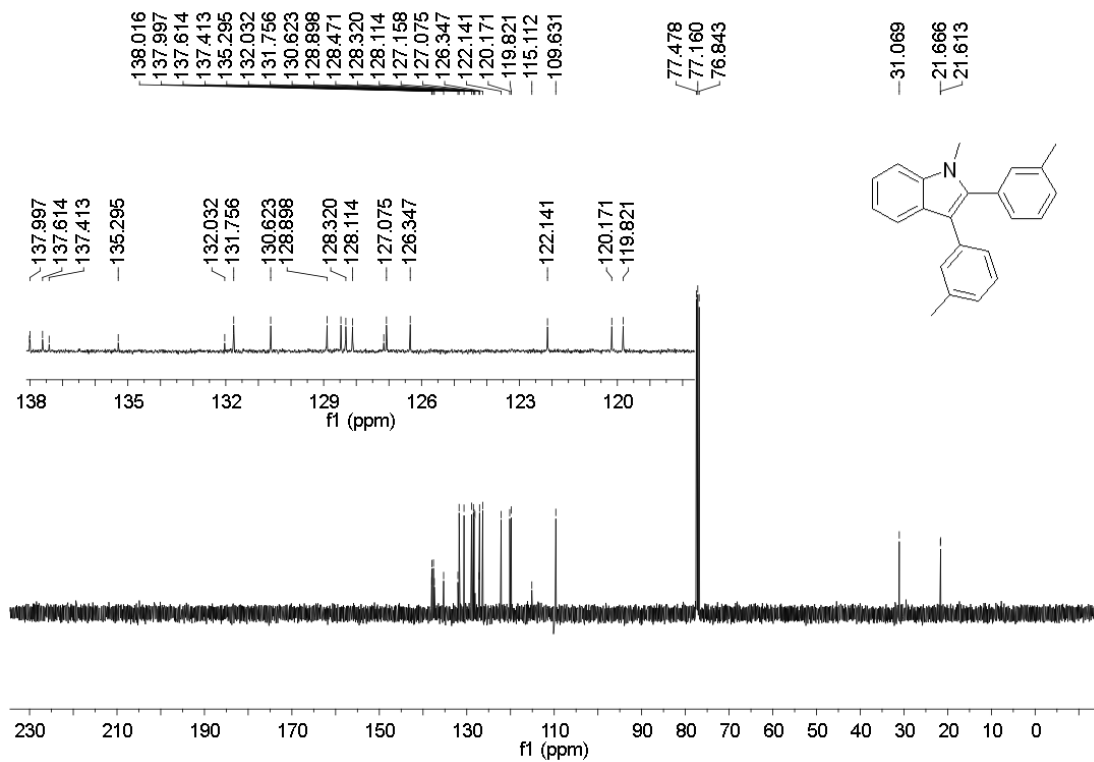

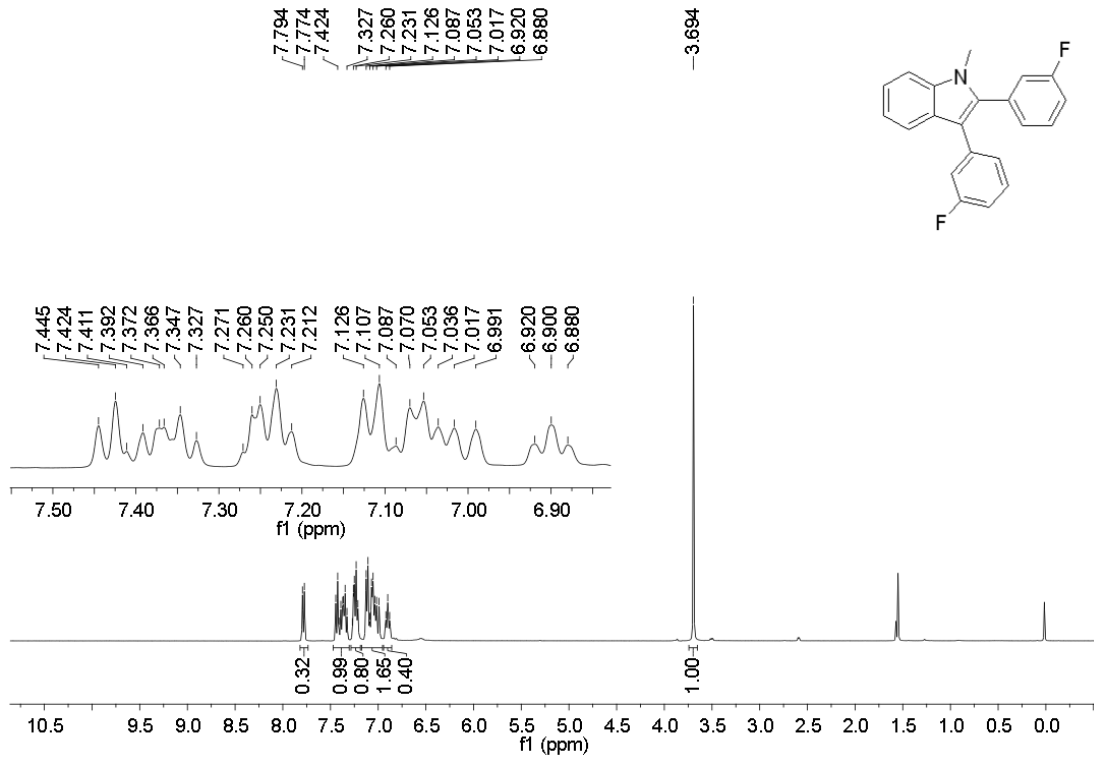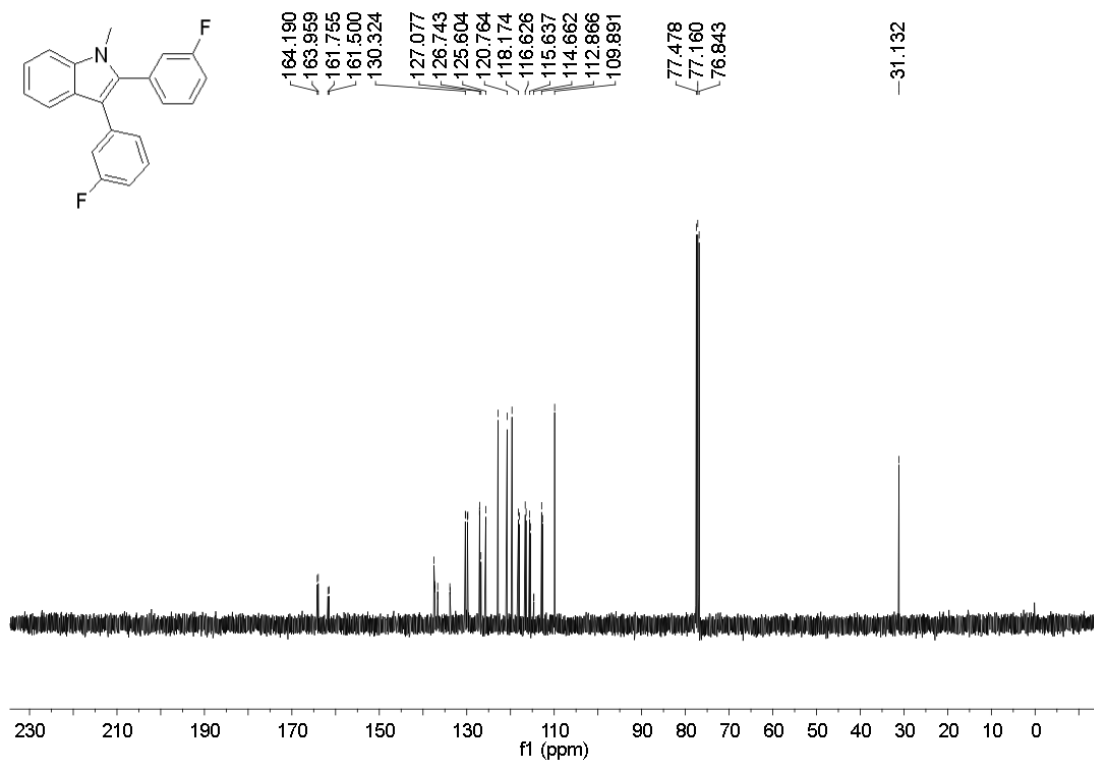

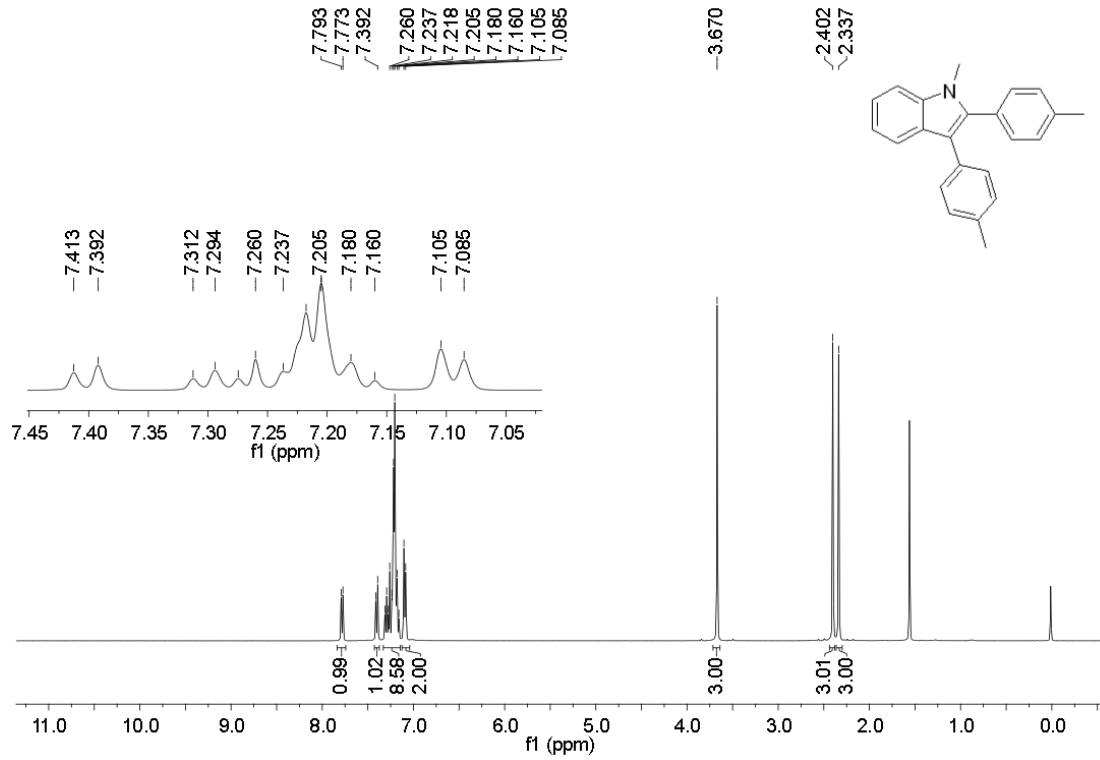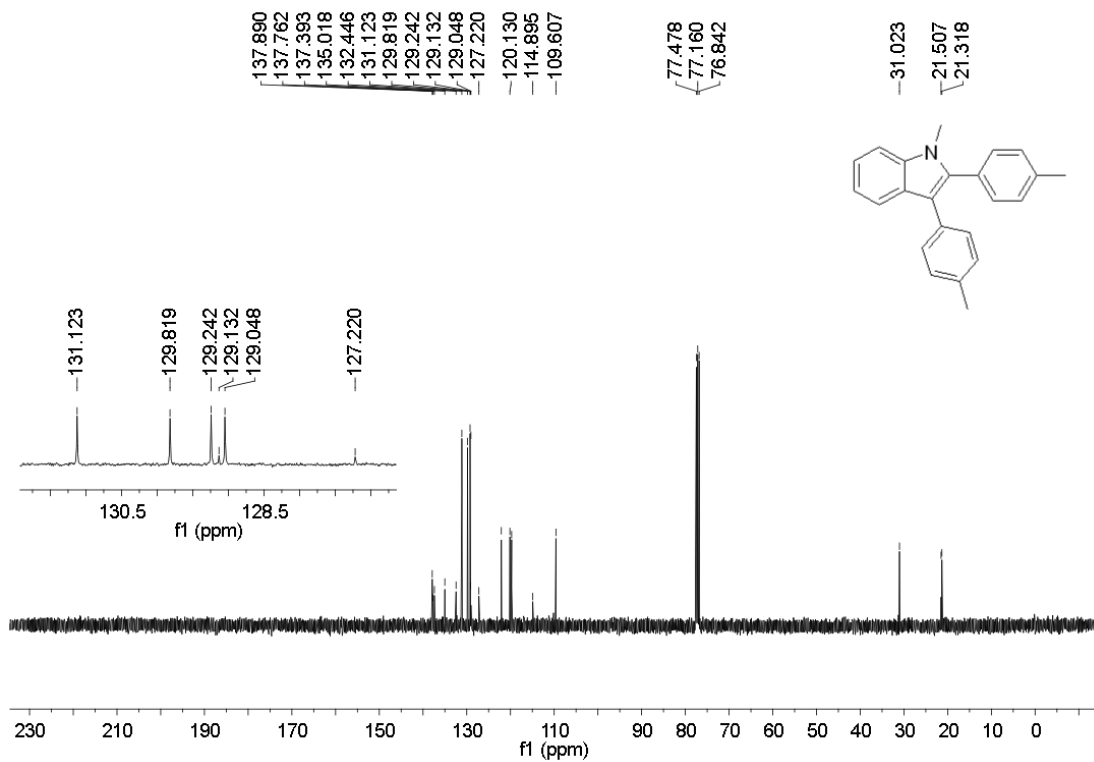

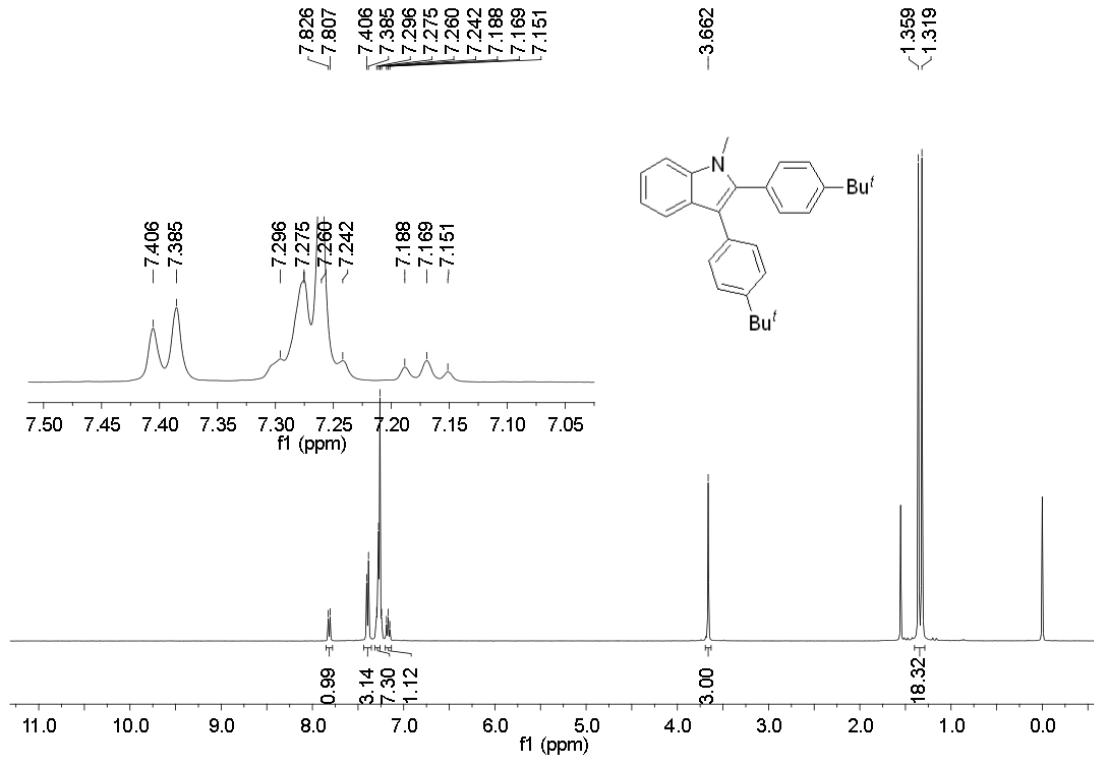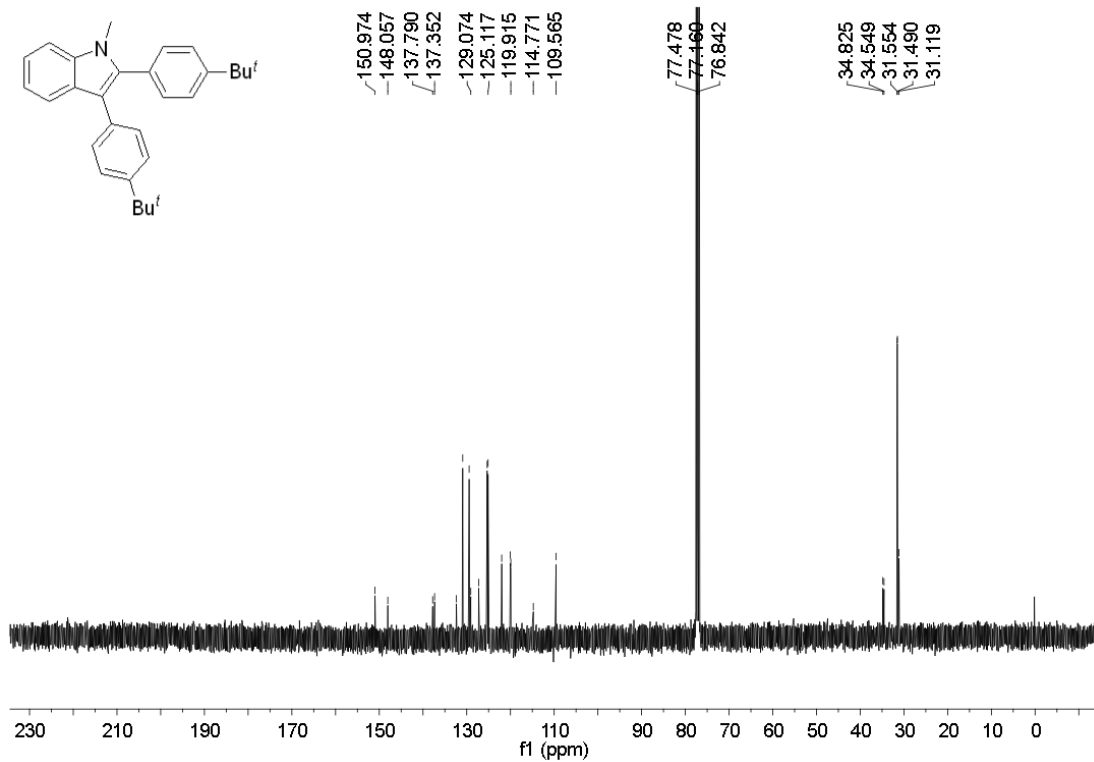

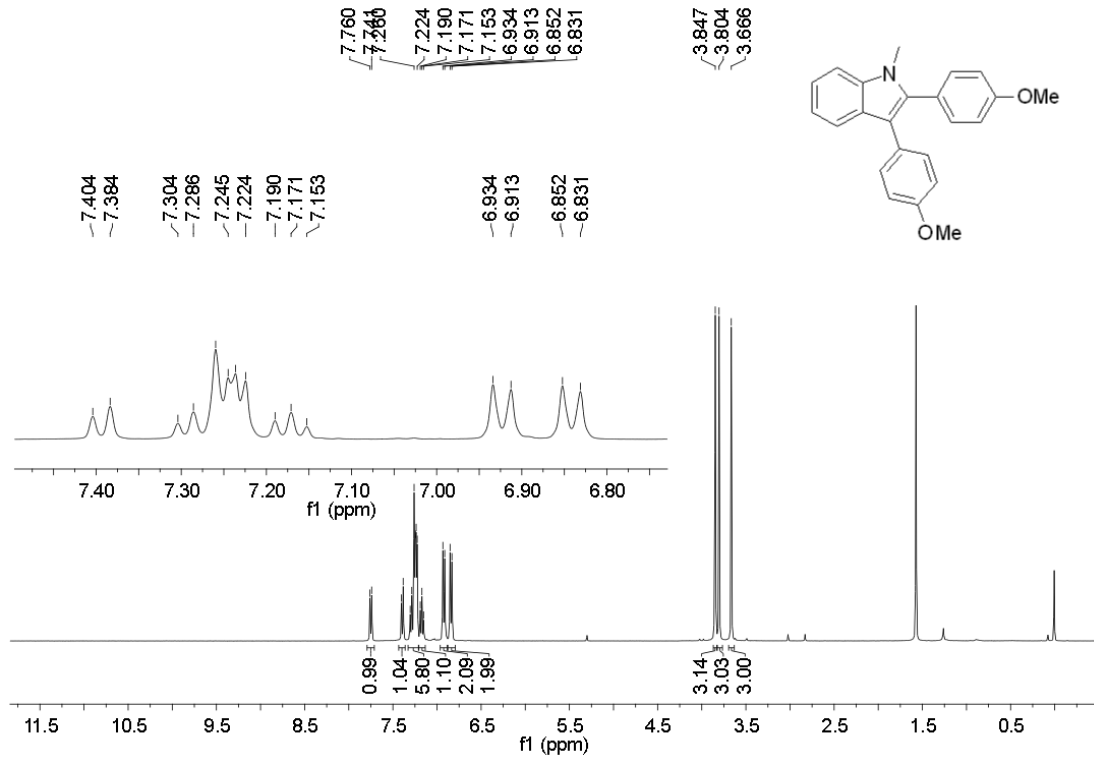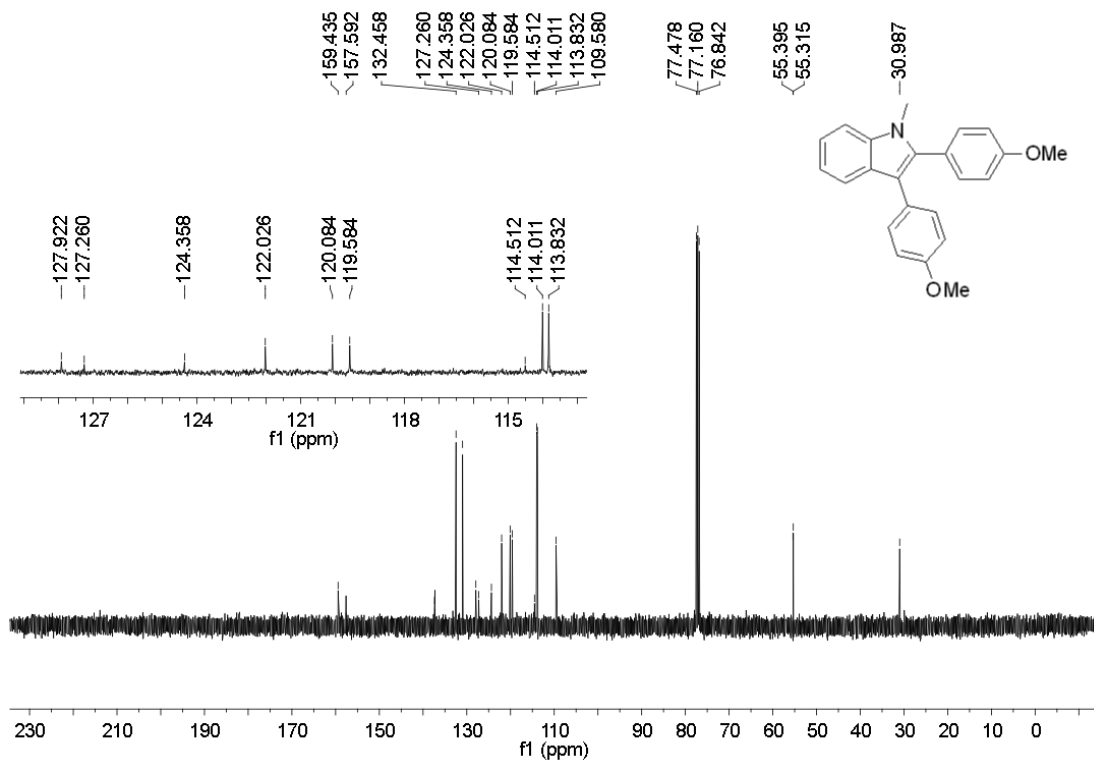

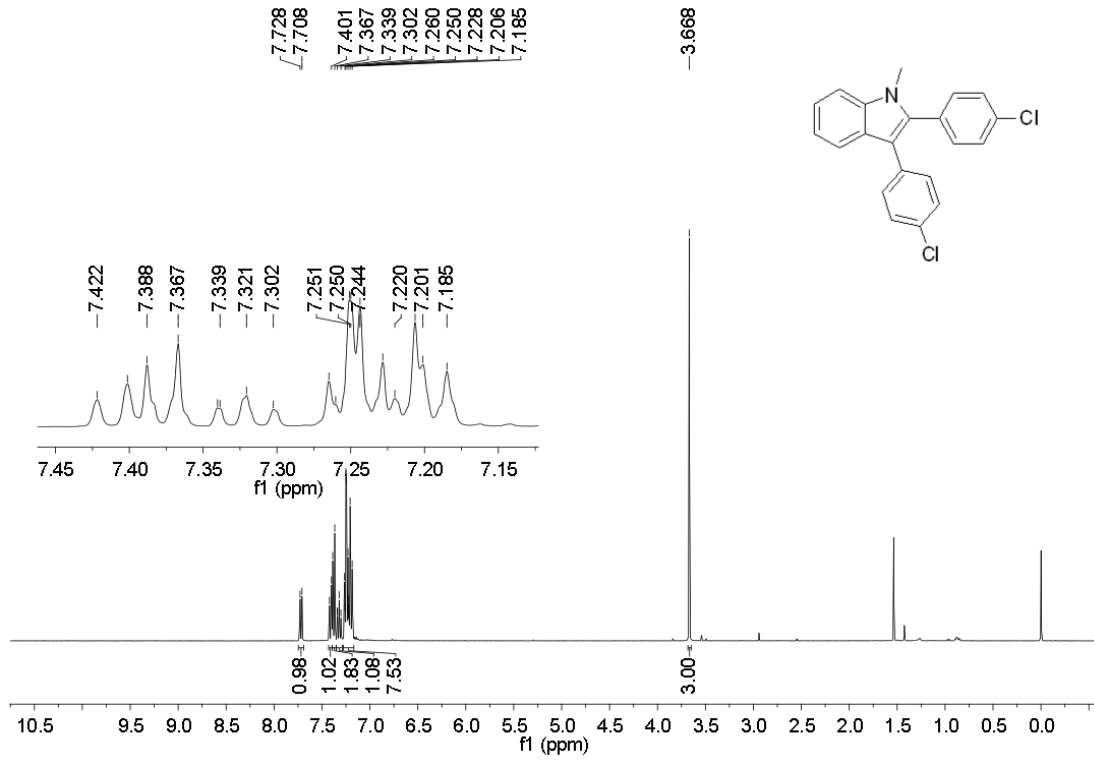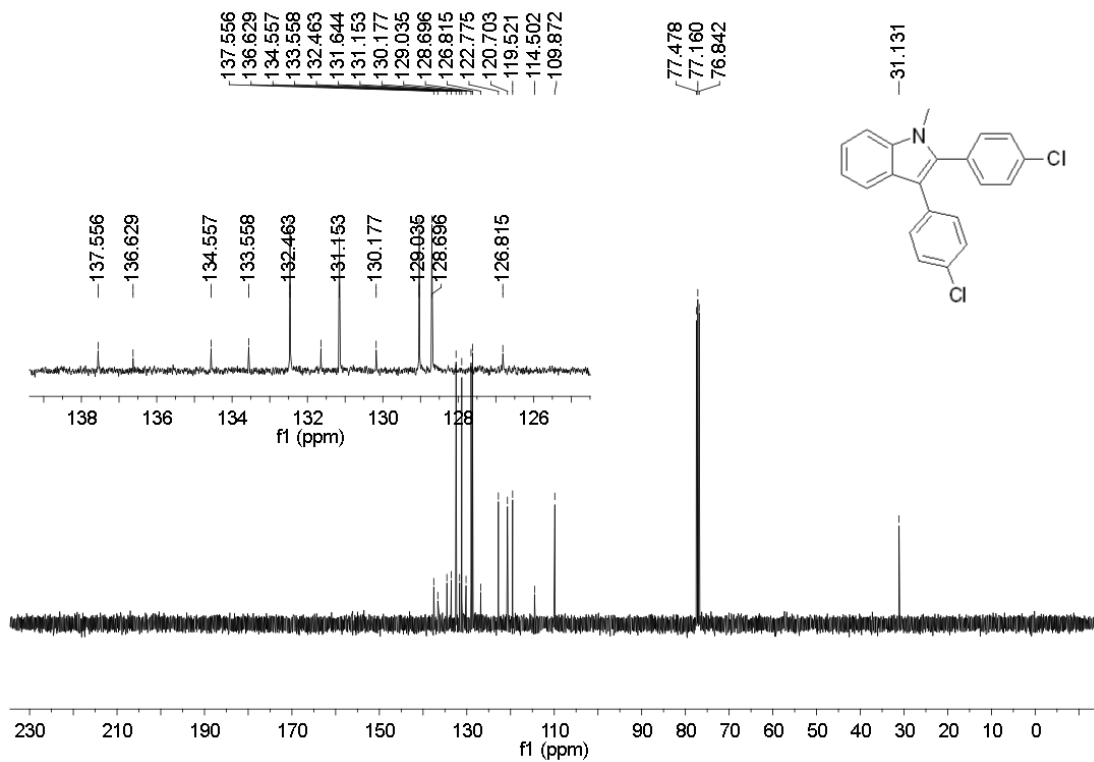

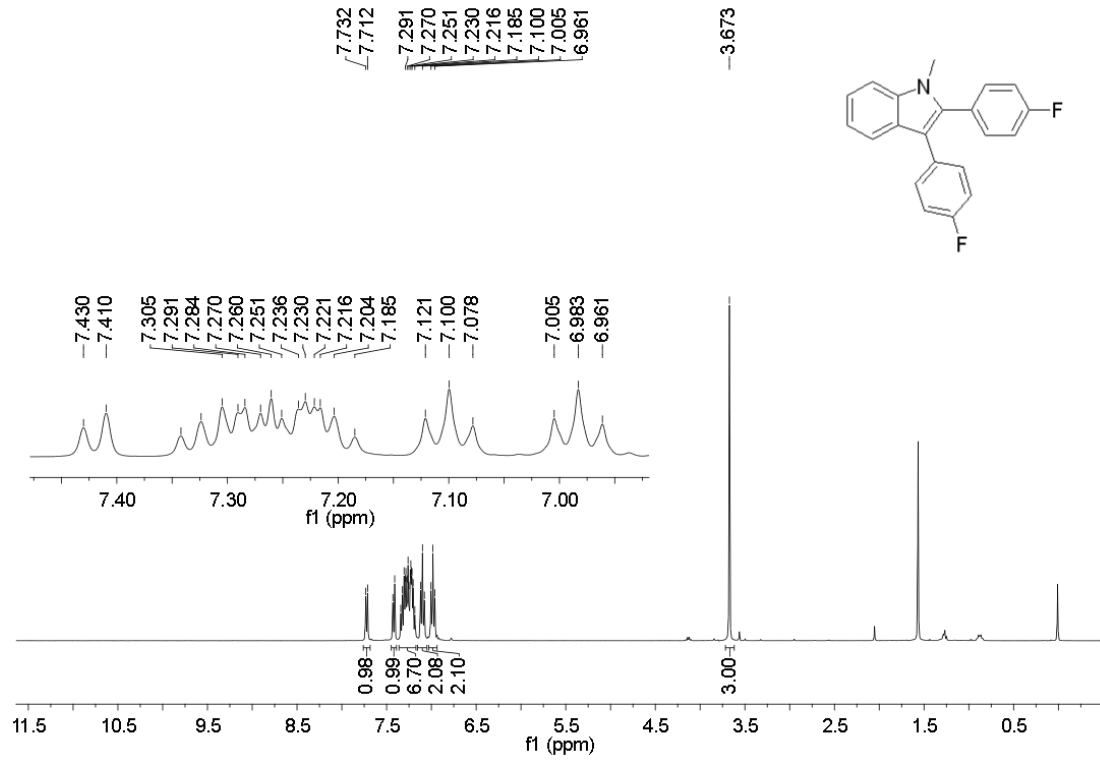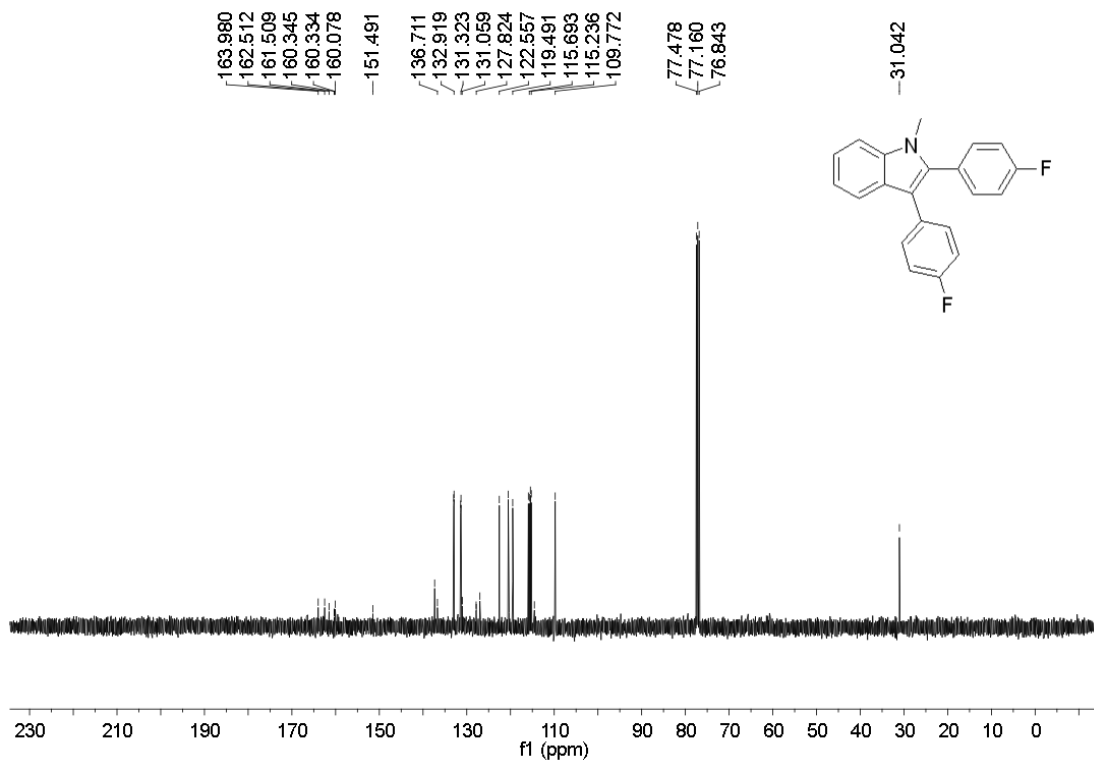



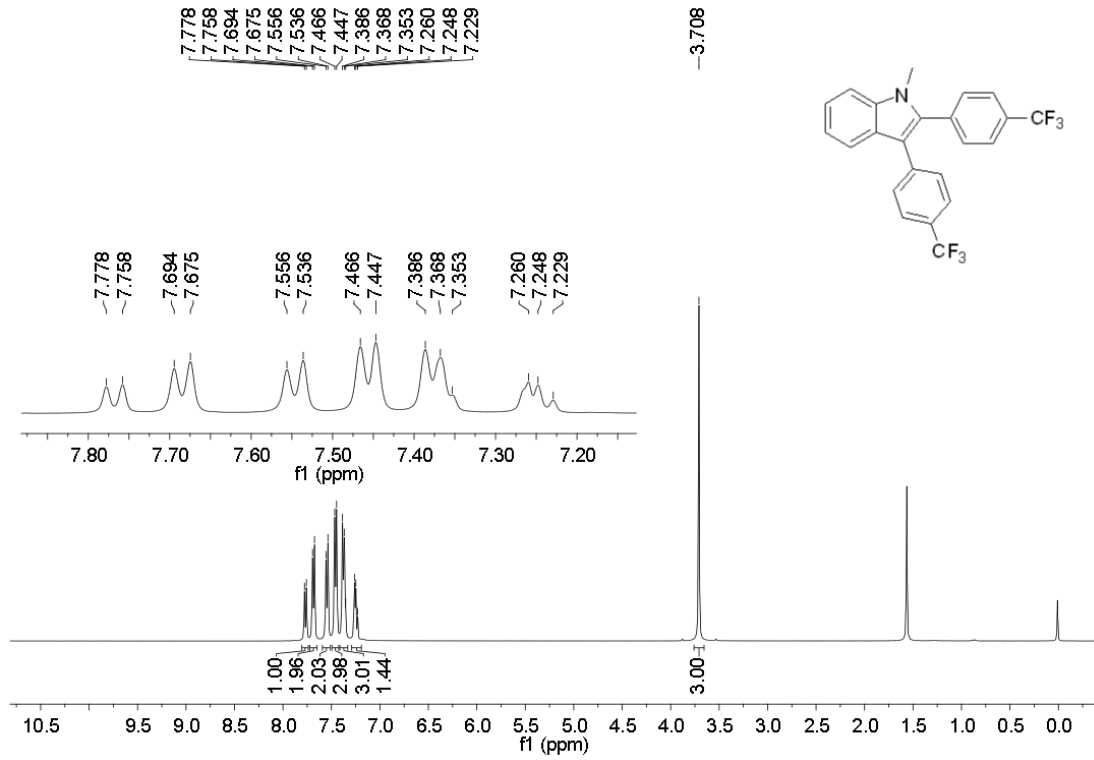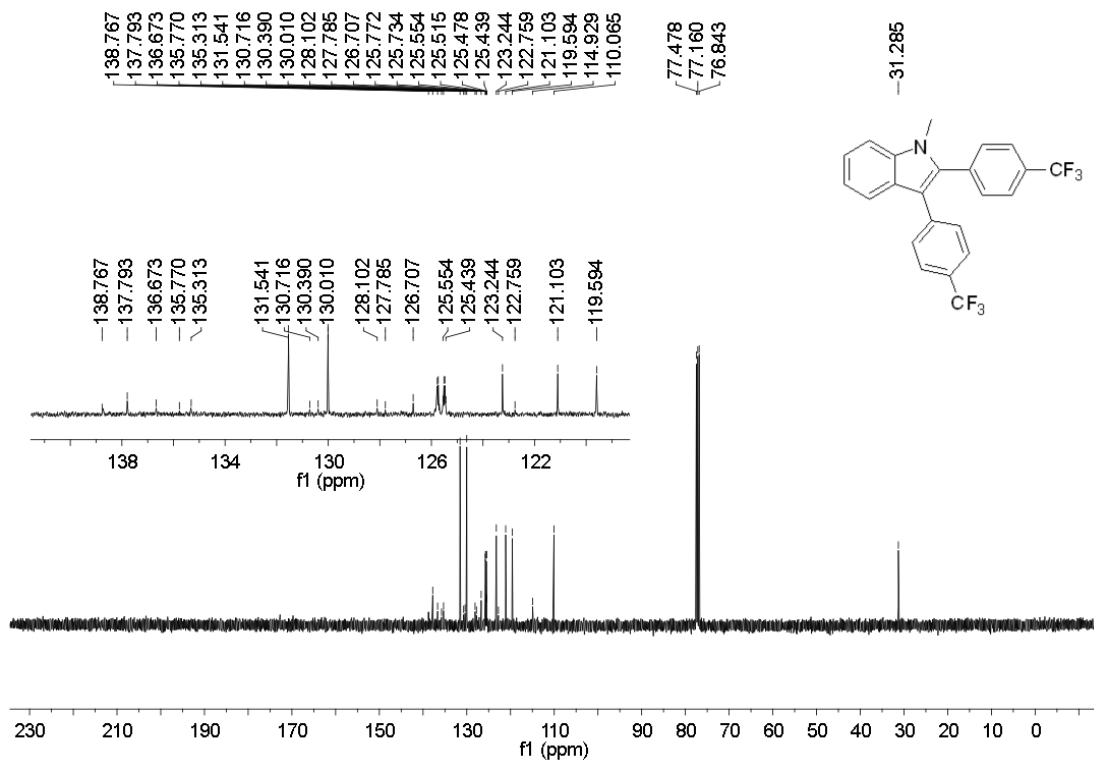

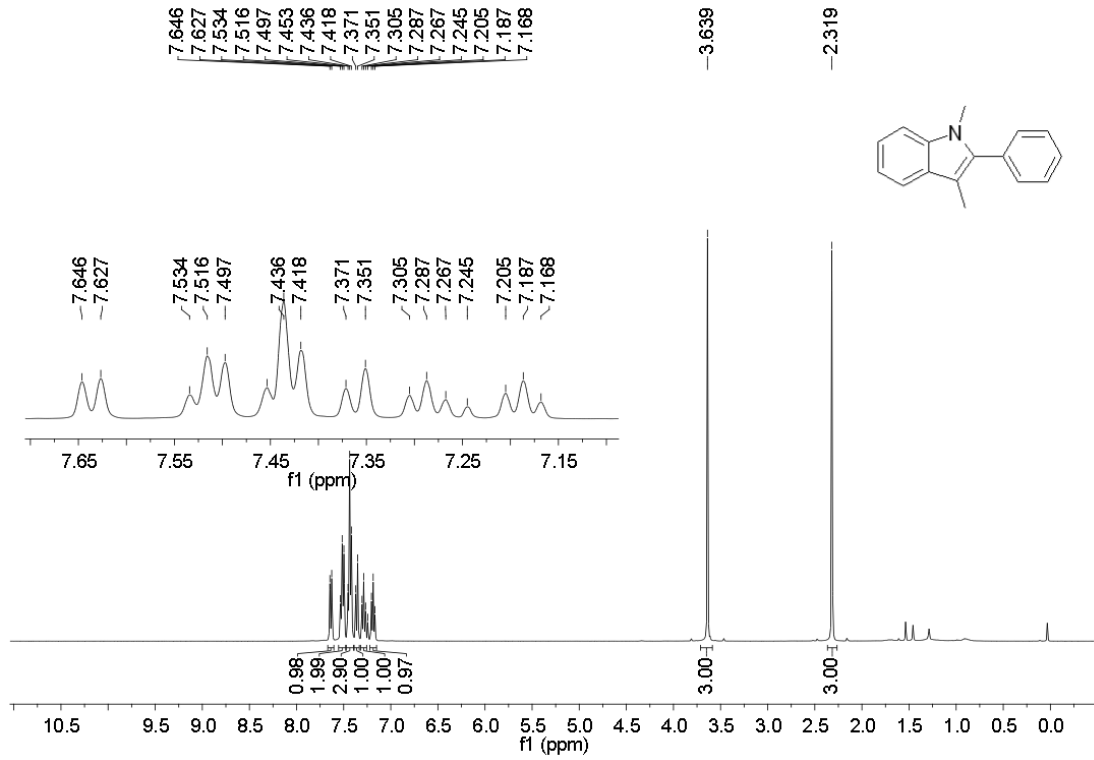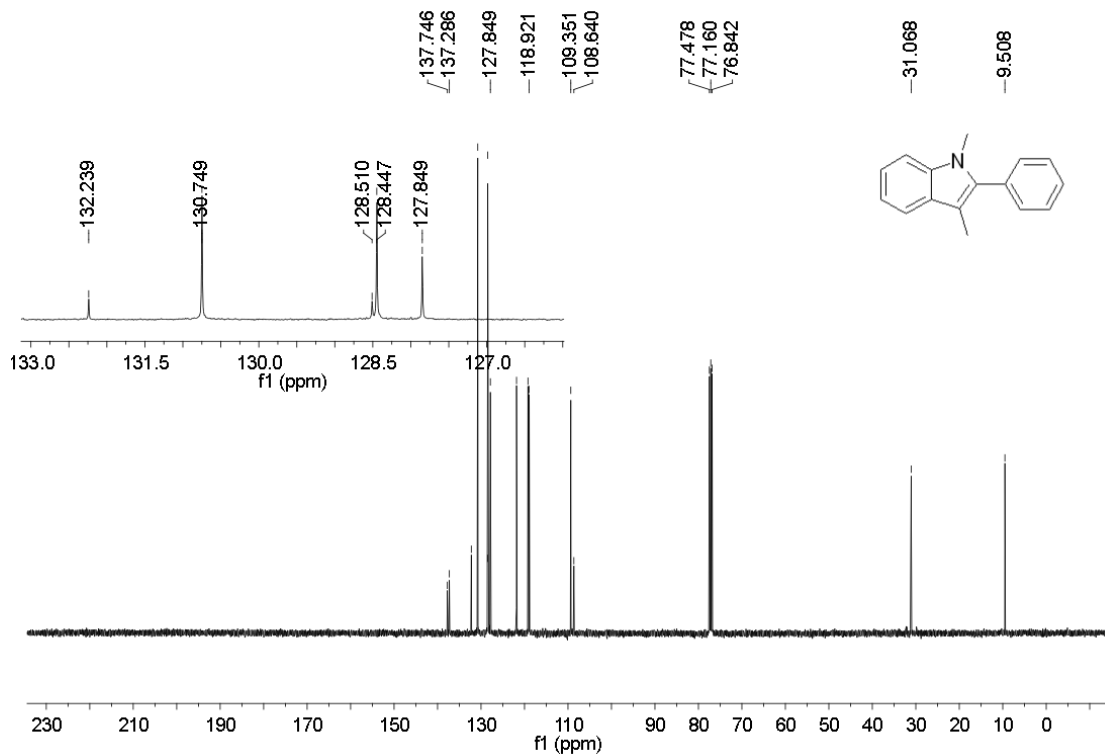

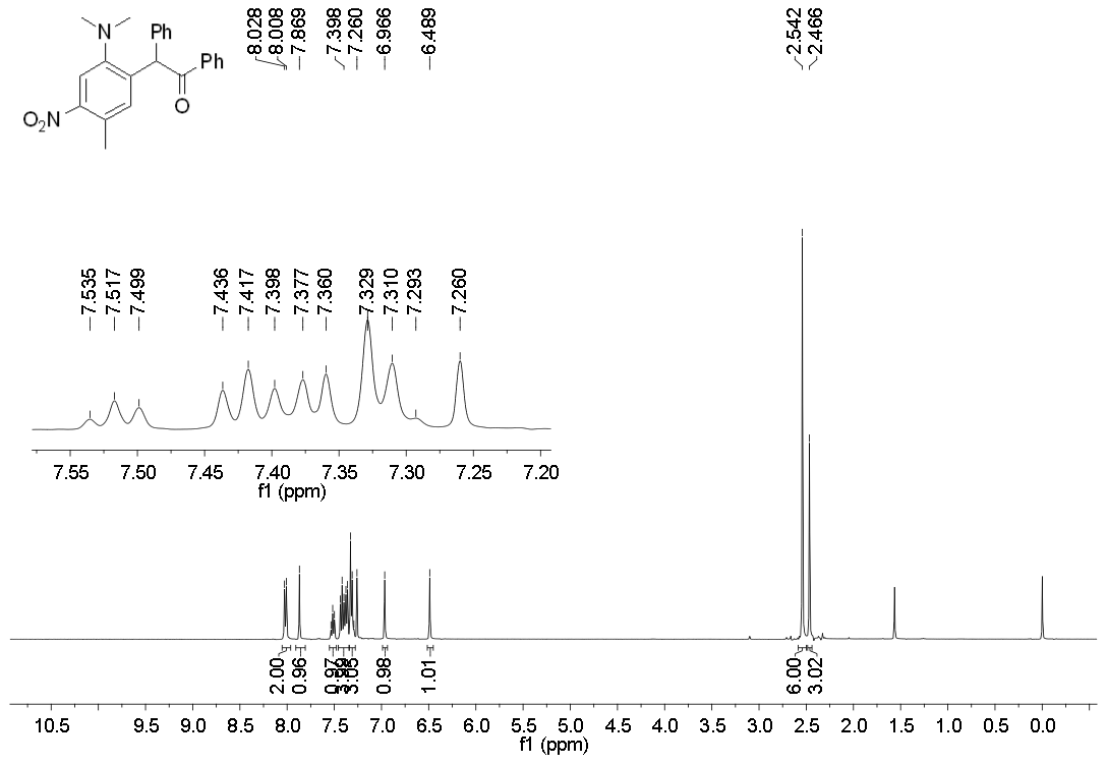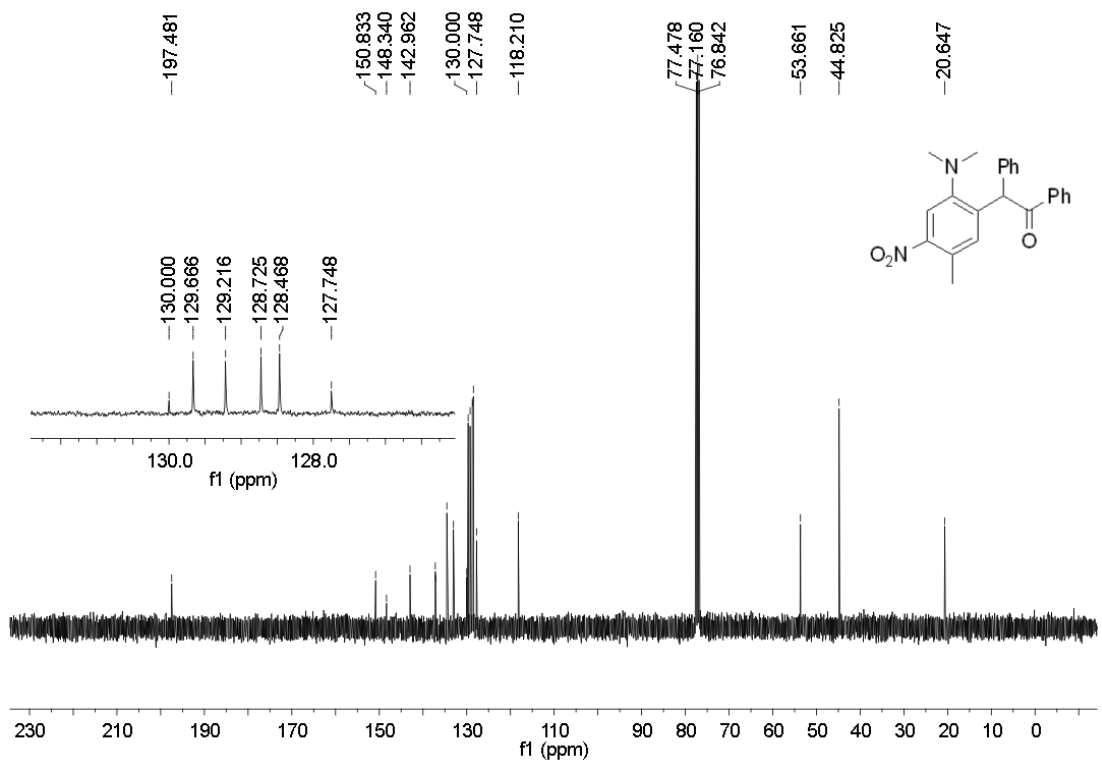

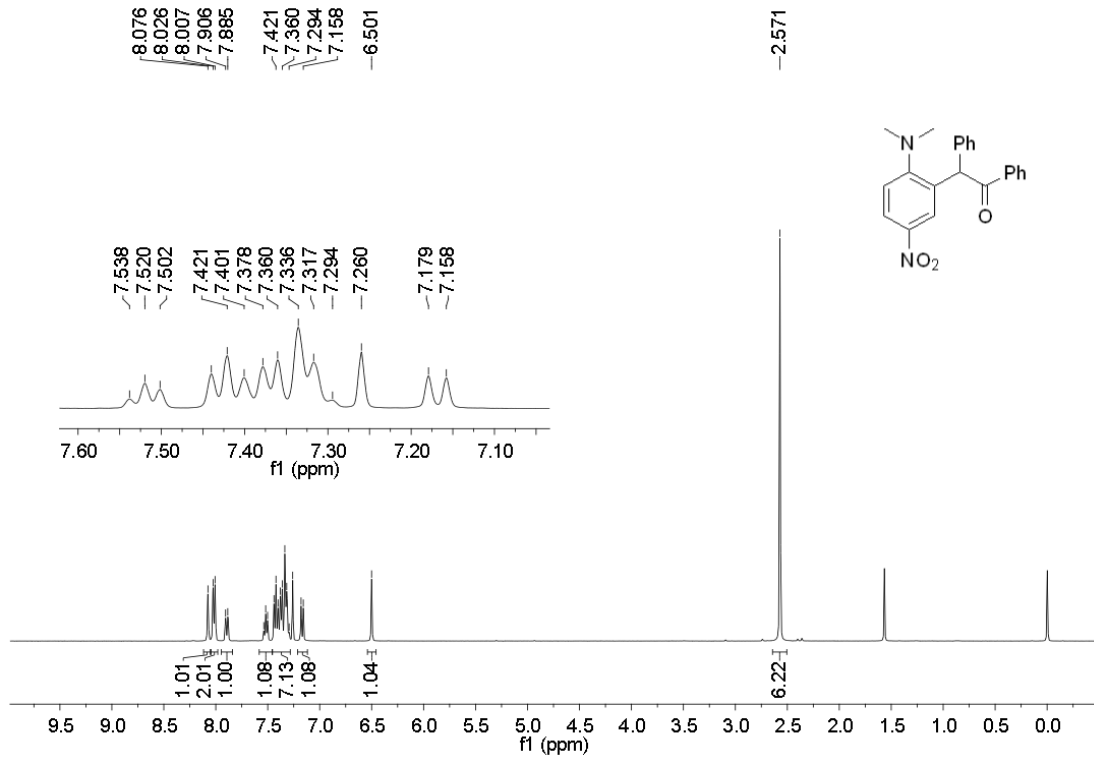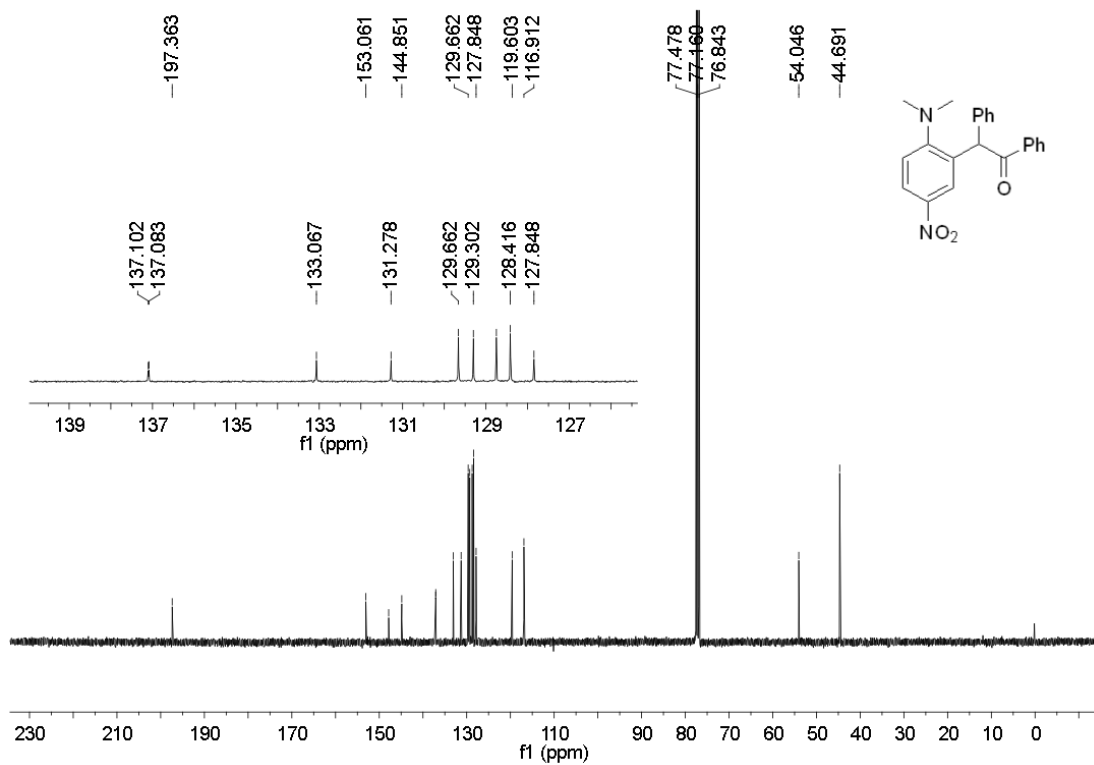

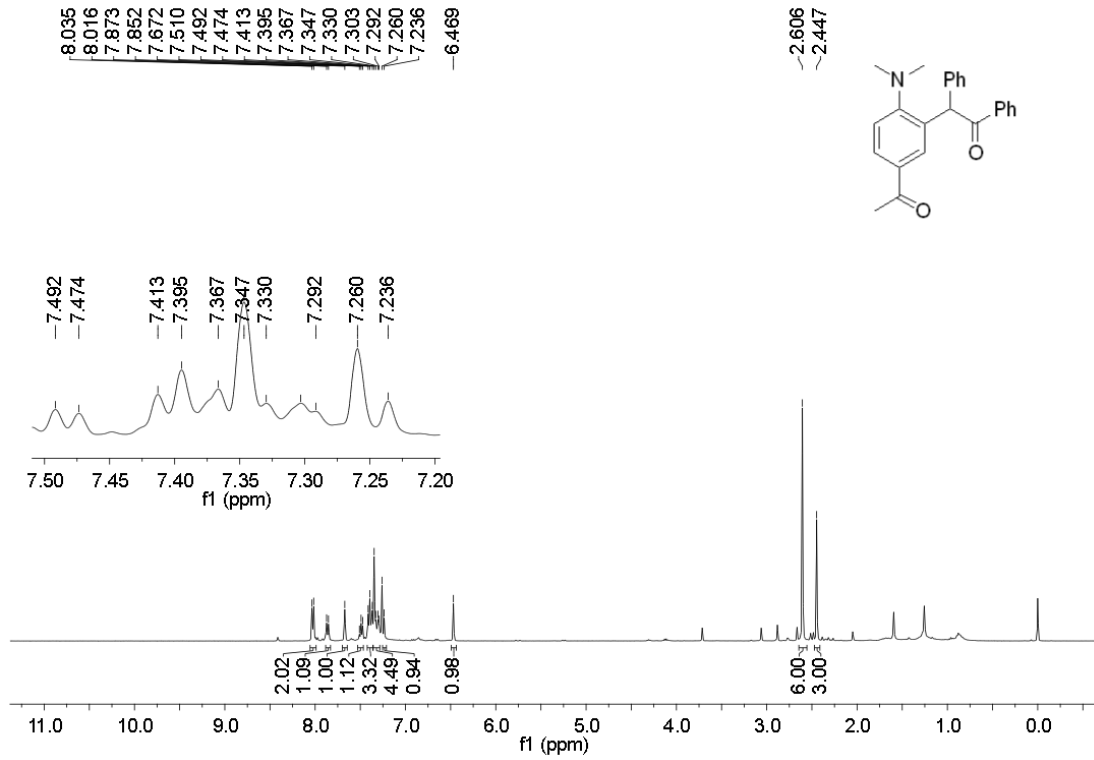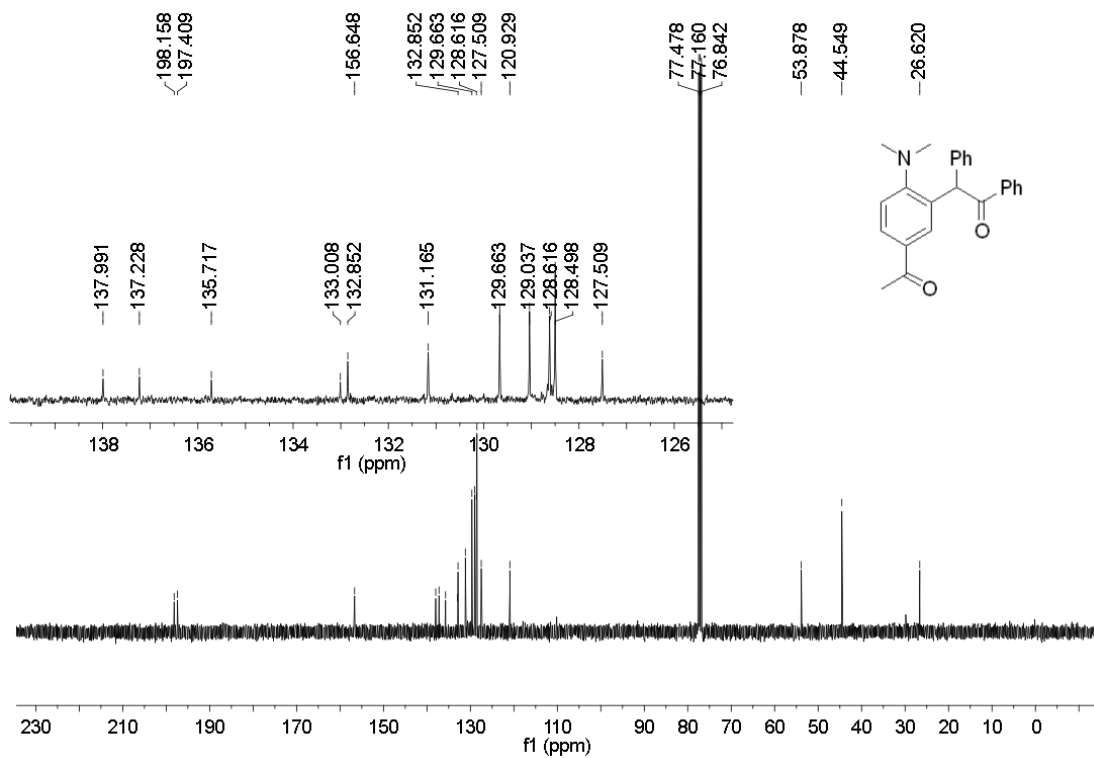

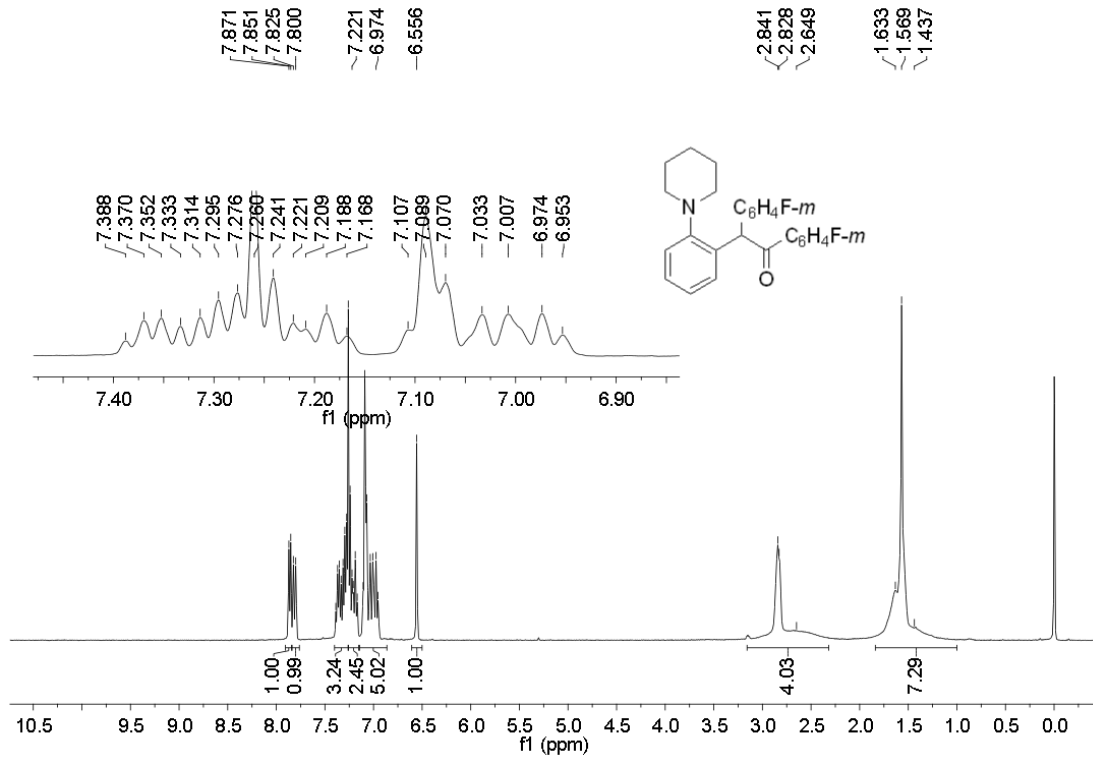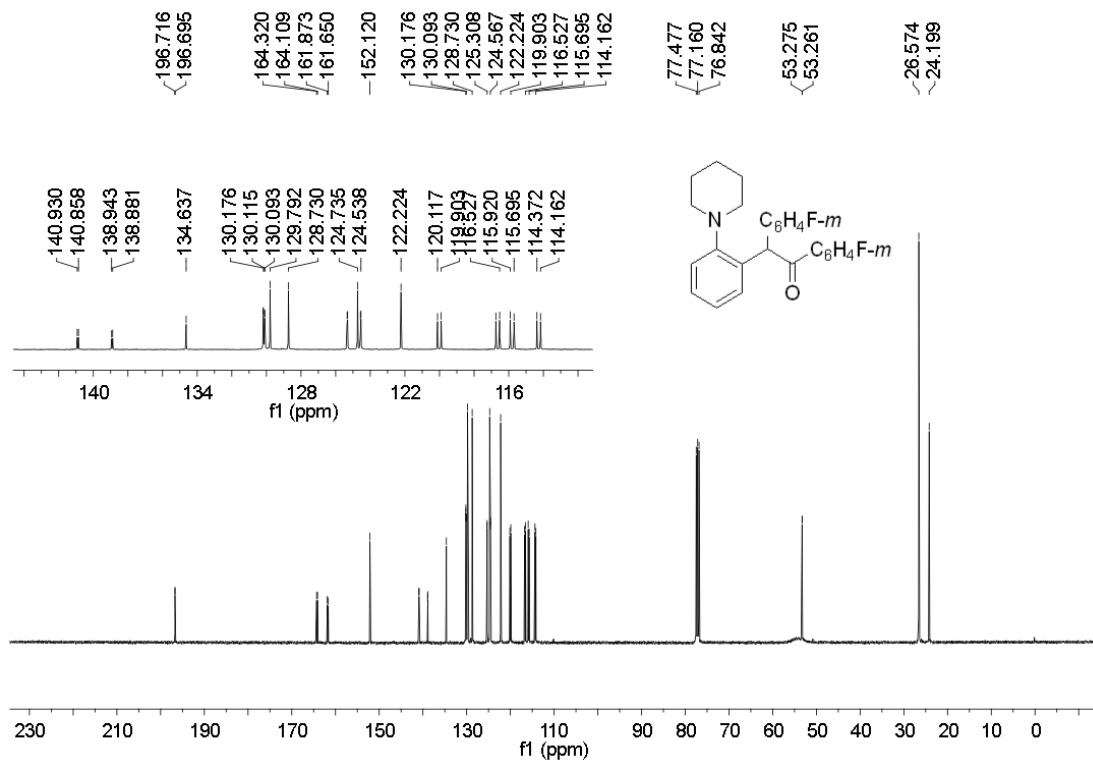

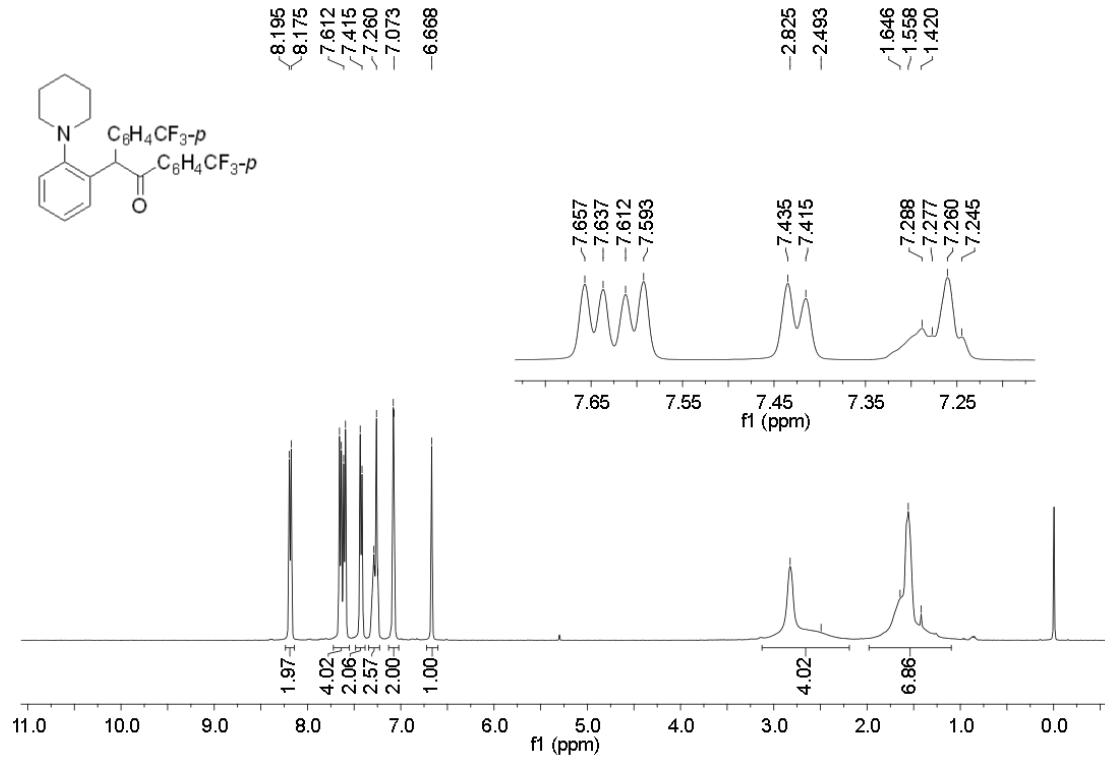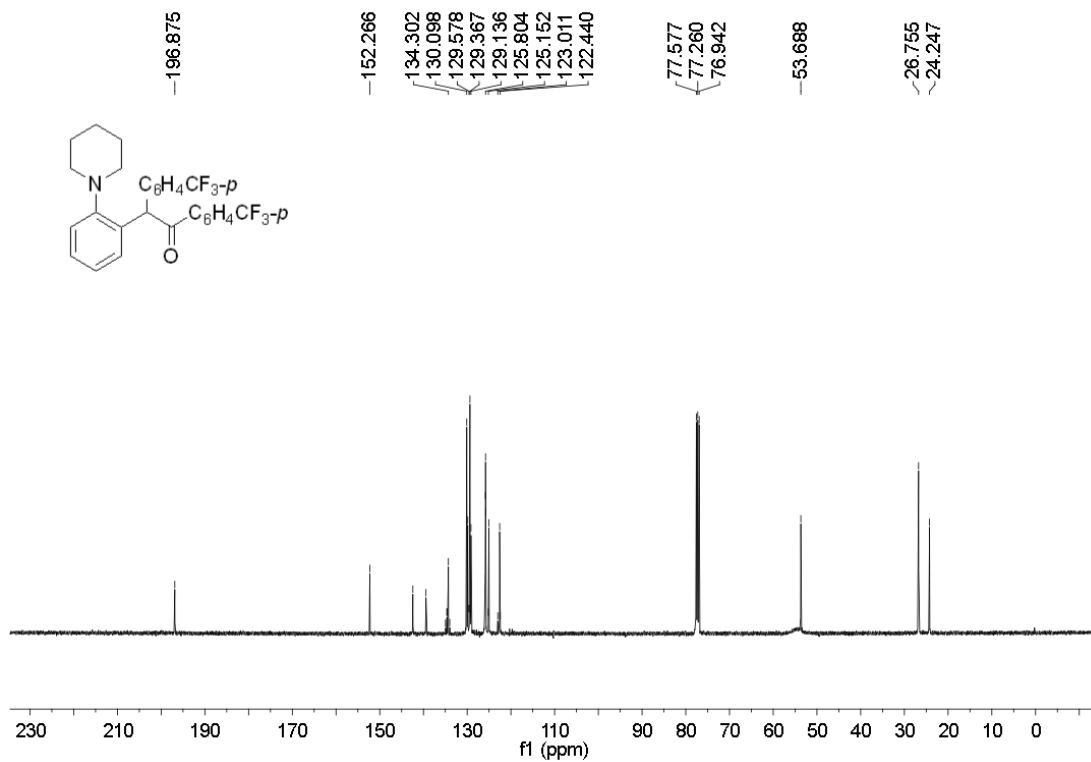

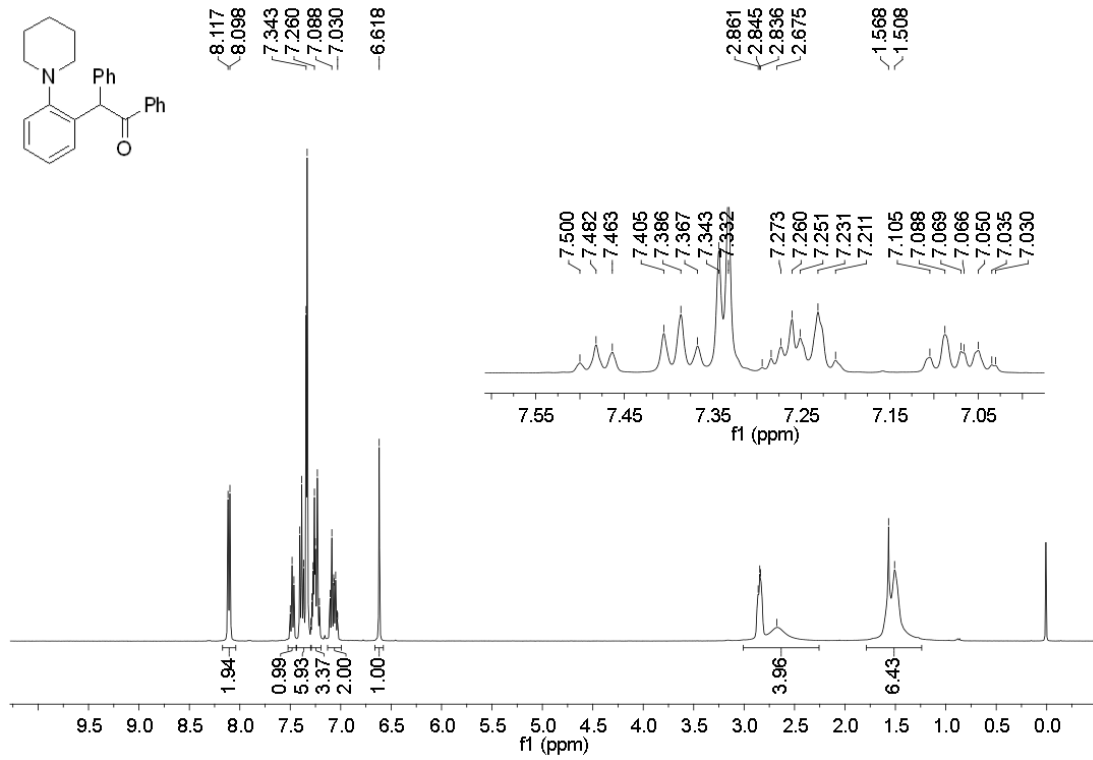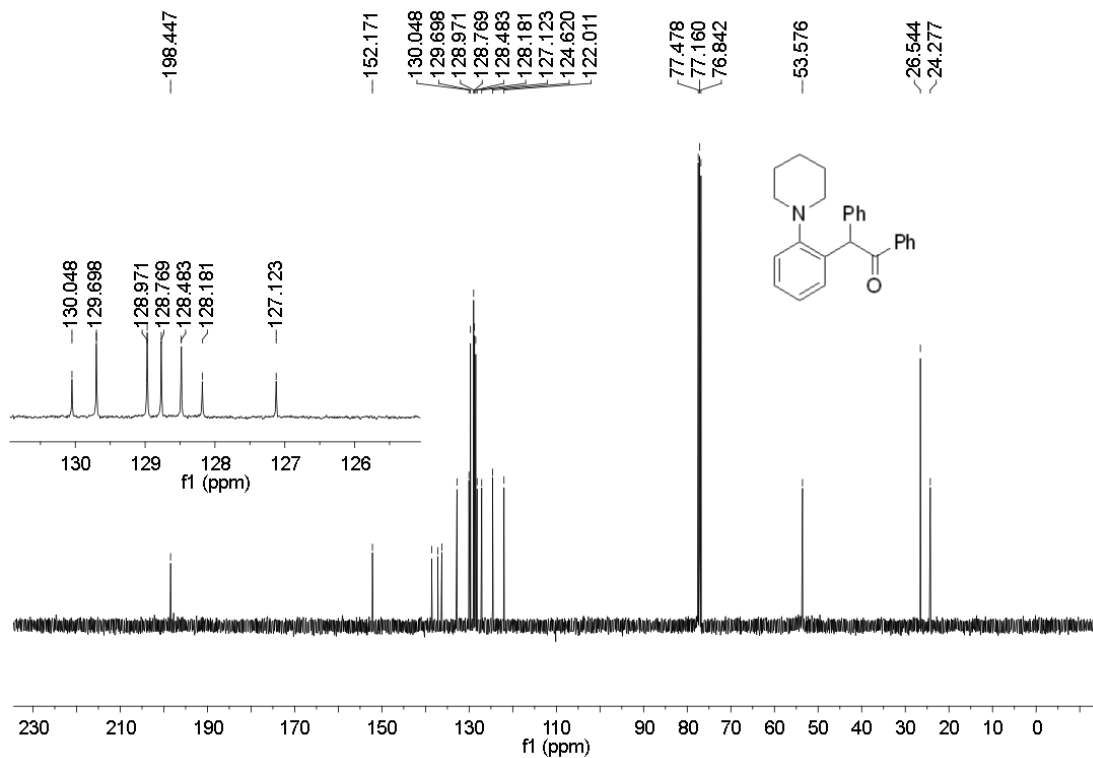



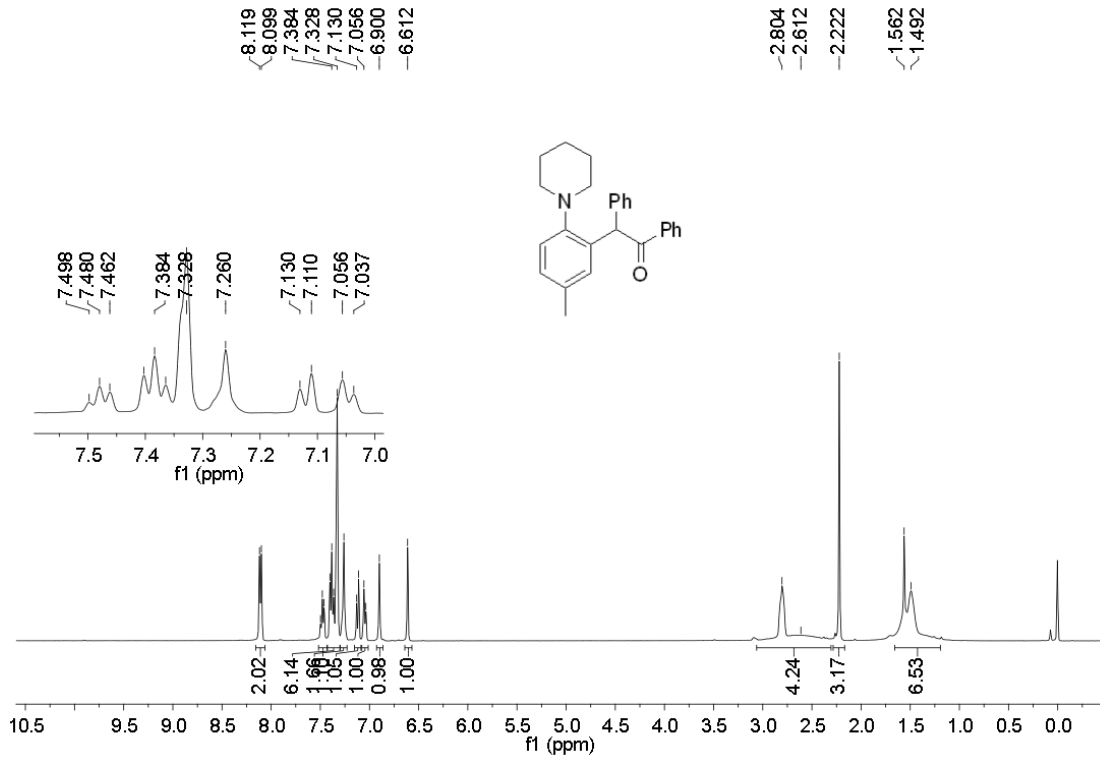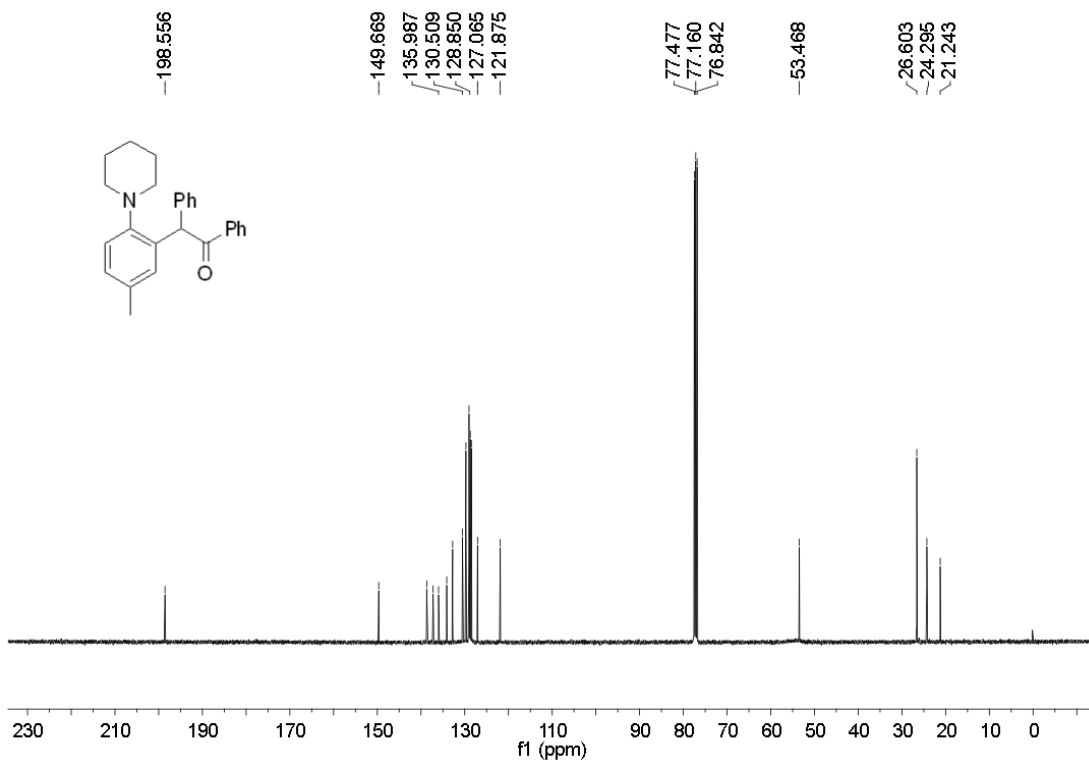

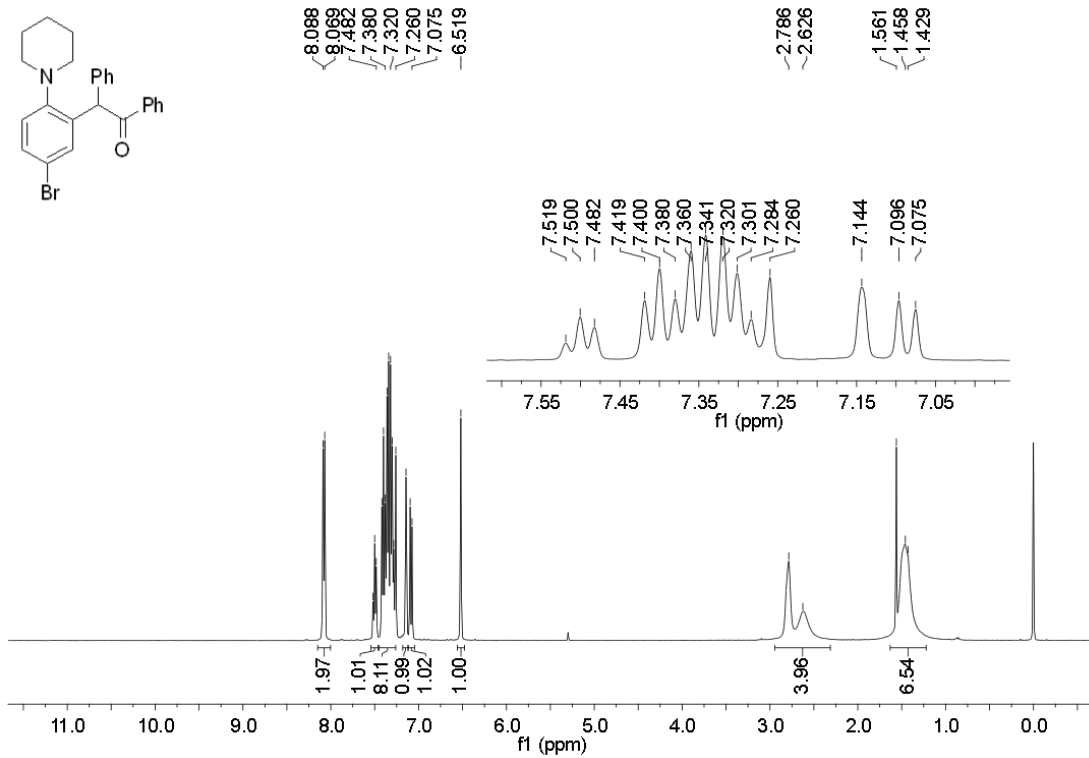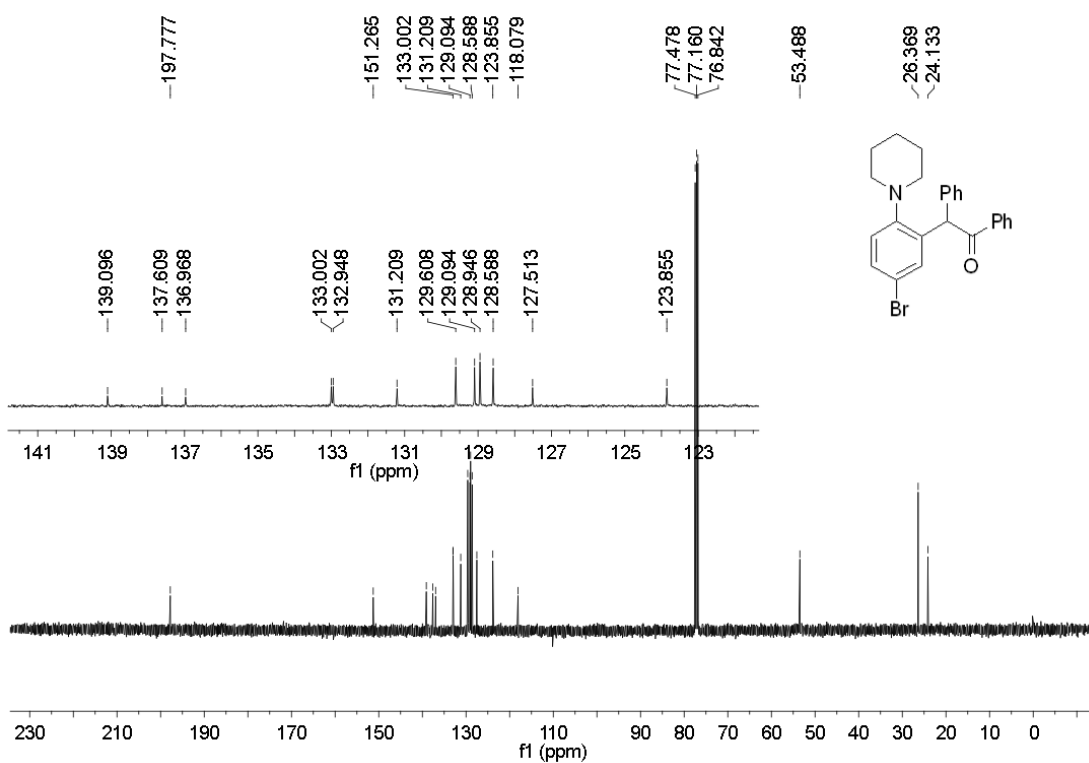

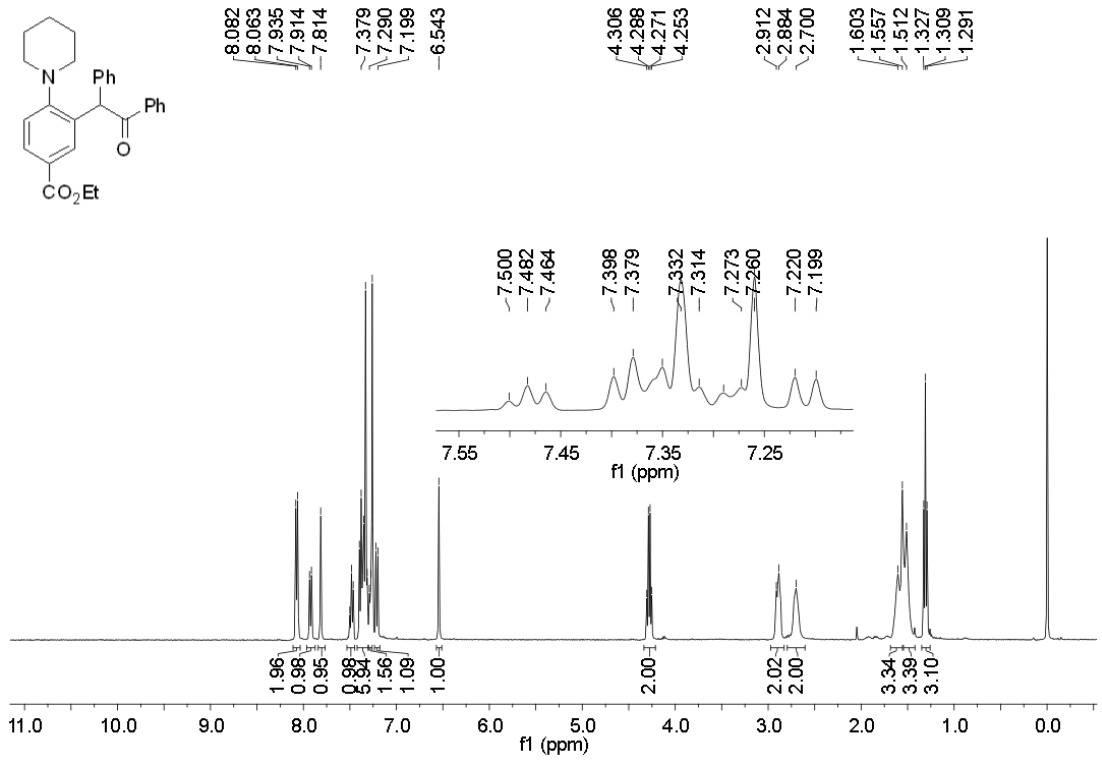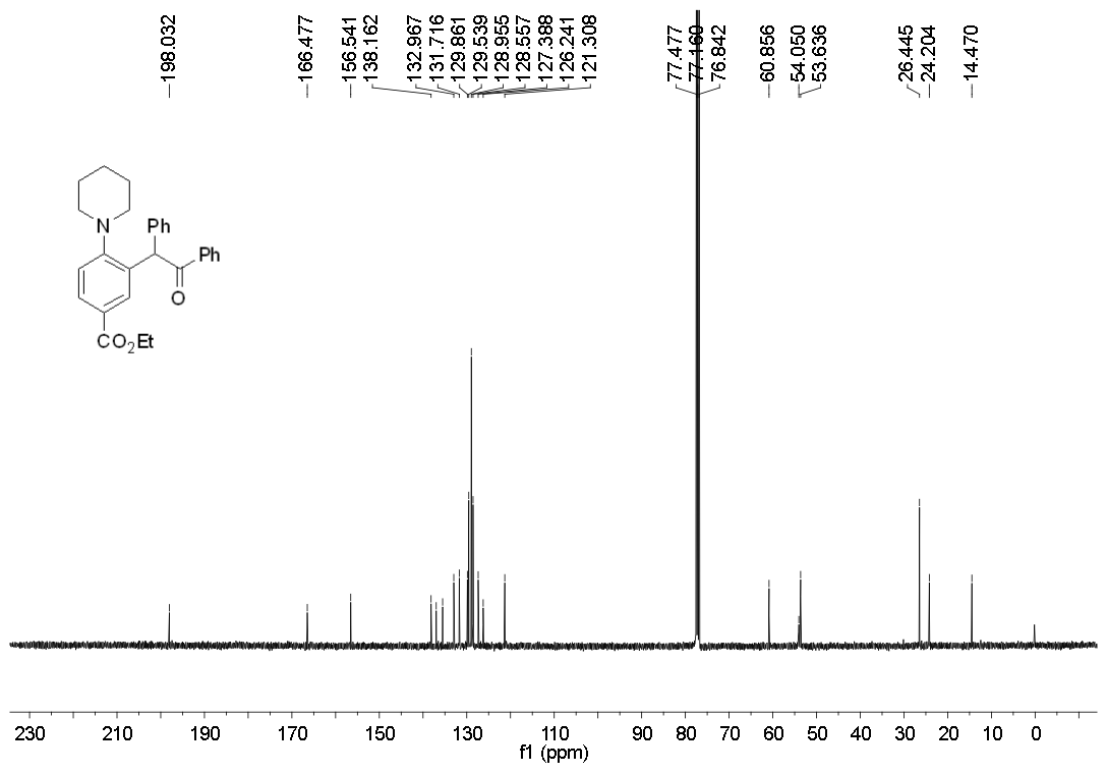

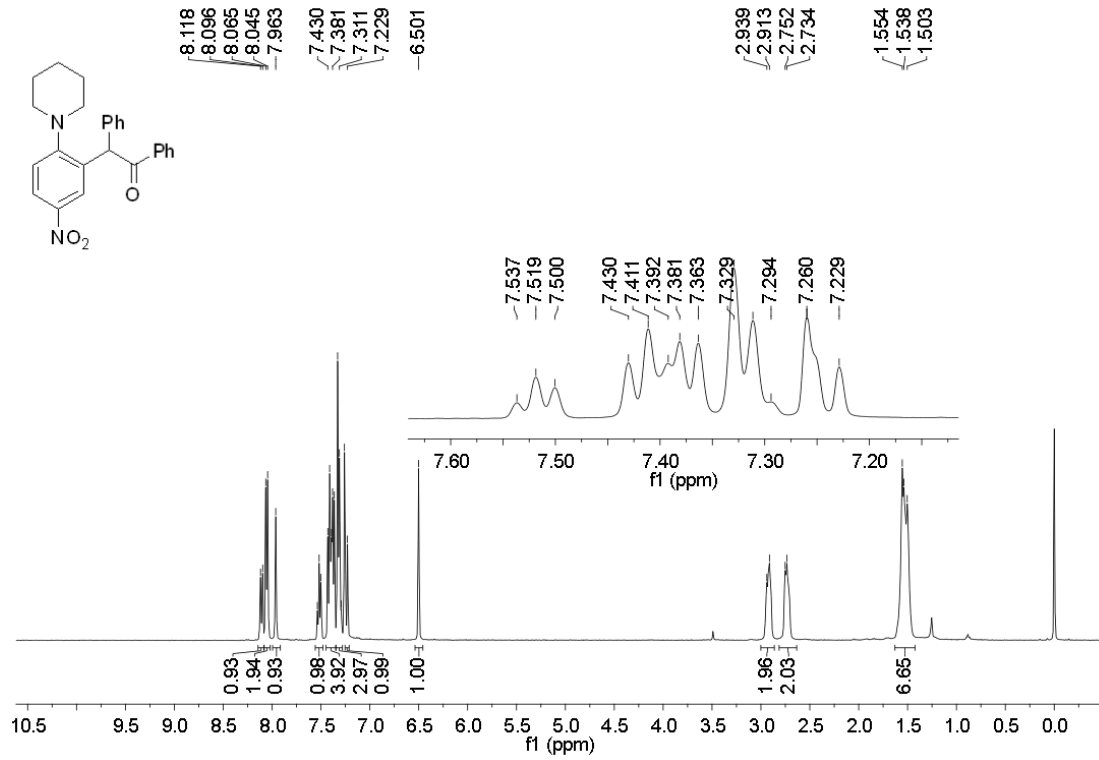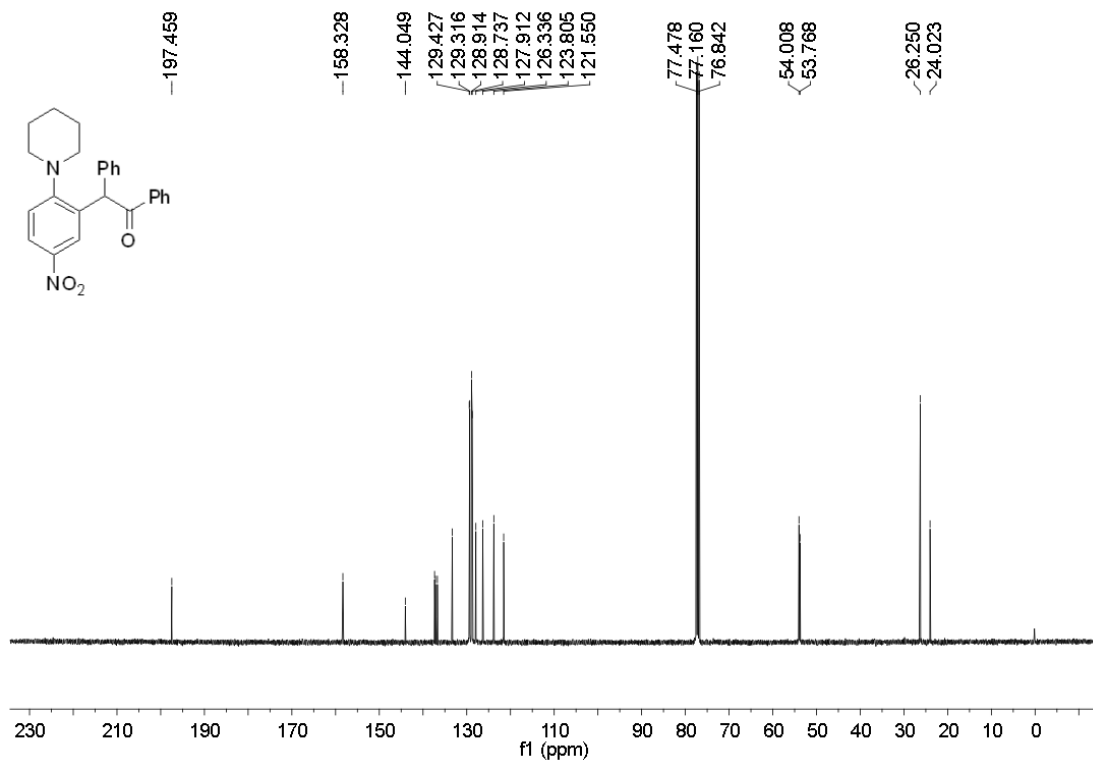

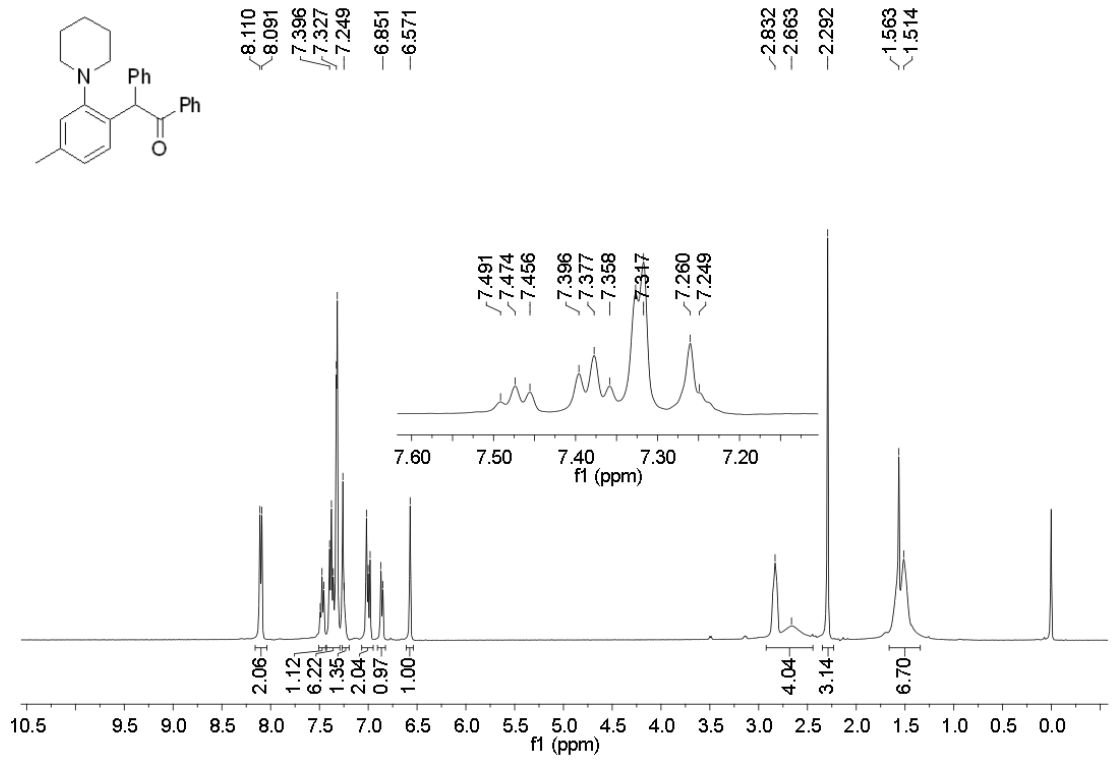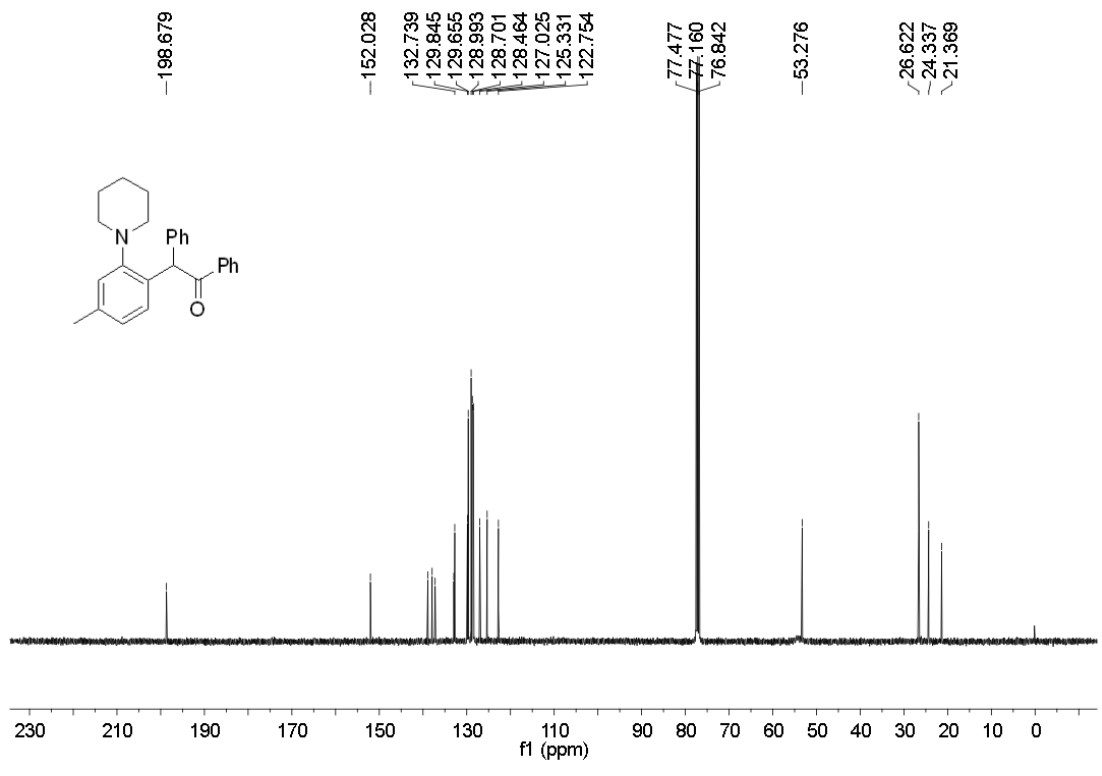

Supplement: c6cc02217k1.pdf [file c6cc02217k1.pdf]
